# Supplementary material for: Identification of RCC Subtype-Specific microRNAs–Meta-Analysis of High-Throughput RCC Tumor microRNA Expression Data
Source: Cancers (Basel). 2021 Feb 1;13(3):548. doi: 10.3390/cancers13030548 (PMC7867039; doi:10.3390/cancers13030548)
Supplement: Supplementary file 1 [file cancers-13-00548-s001.zip]

Archive with 4 entries (4 files):
- Supplementary_Figures.pdf
- Supplementary_File_S1.xlsx
- Supplementary_File_S2.xlsx
- Supplementary_Tables.pdf
