# Supplementary material for: Identification of RCC Subtype-Specific microRNAs–Meta-Analysis of High-Throughput RCC Tumor microRNA Expression Data
Source: Cancers (Basel). 2021 Feb 1;13(3):548. doi: 10.3390/cancers13030548 (PMC7867039; doi:10.3390/cancers13030548)
Supplement: Supplementary file 1 [file cancers-13-00548-s001.zip › Supplementary_Figures.pdf]

# Identification of RCC Subtype-Specific microRNAs–Meta-Analysis of High-Throughput RCC Tumor microRNA Expression Data

Arkadiusz Kajdasz, Weronika Majer, Katarzyna Kluzek, Jacek Sobkowiak, Tomasz Milecki, Natalia Derebecka, Zbigniew Kwias, Hans A.R. Bluysen and Joanna Wesoly

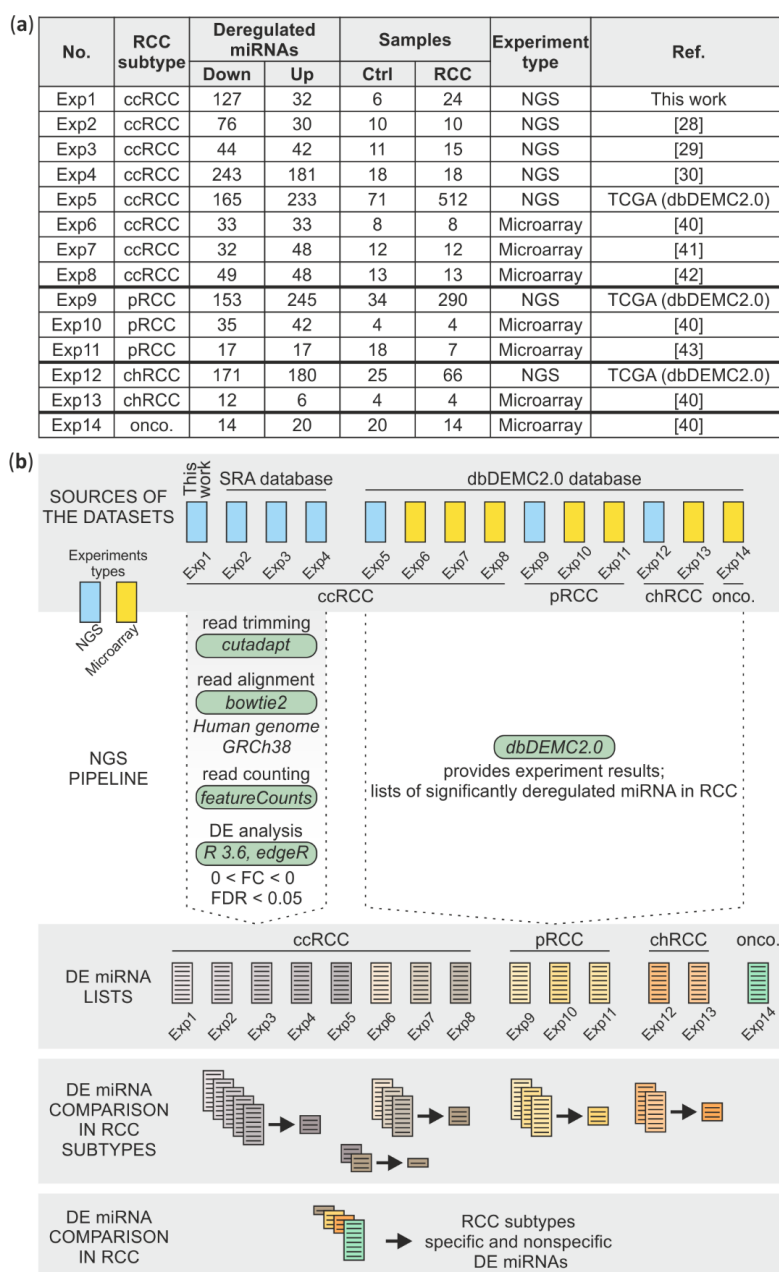

**Figure S1. The meta-analysis workflow.** (a) List of data sets used in the meta-analysis; (b) Analysis workflow. Raw NGS data was re-analyzed using identical data processing pipeline. Microarray and The Cancer Genome Atlas (TCGA) results were obtained in a form of a list of deregulated miRNAs from the dbDEMC2.0 database. ccRCC, clear renal cell carcinoma; pRCC, papillary renal cell carcinoma; chRCC, chromophobe renal cell carcinoma; onco., oncocytoma; FDR, the false discovery rate; FC, fold change; DE, differential expression; Exp1-8, experiments 1-8.

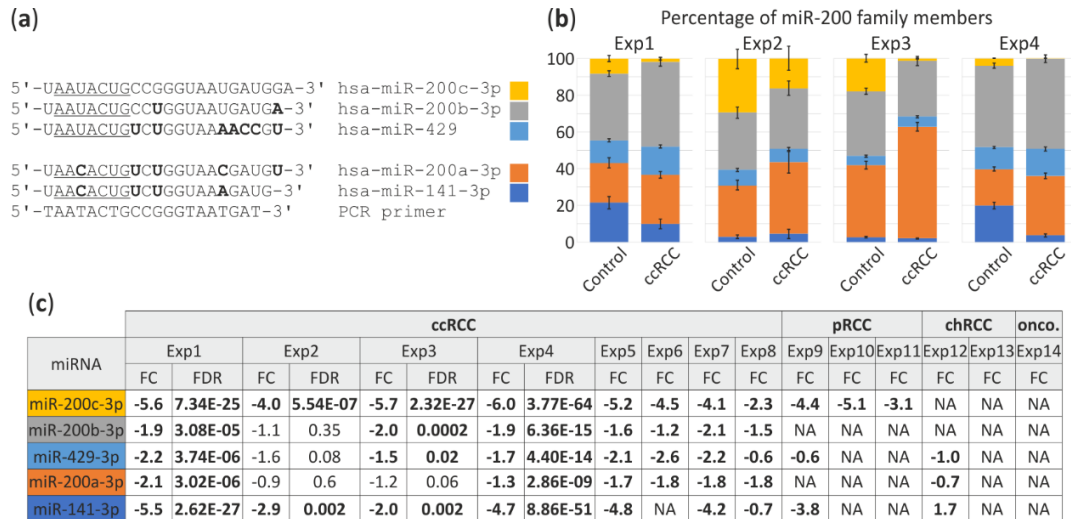

**Figure S2. miRNA-200-3p family.** (a) Sequence of miRNA-200-3p family members. Underline, seed sequence; bold, differences in miRNA sequences according to miRNA-200c-3p; (b) The percentage contribution of miRNA-200-3p family members in control and ccRCC tissues in NGS experiments; (c) Expression levels of miRNA-200-3p family members in studies used in the meta-analysis. Bold, significantly deregulated miRNA (FDR < 0.05). FC, fold change; FDR, the false discovery rate.

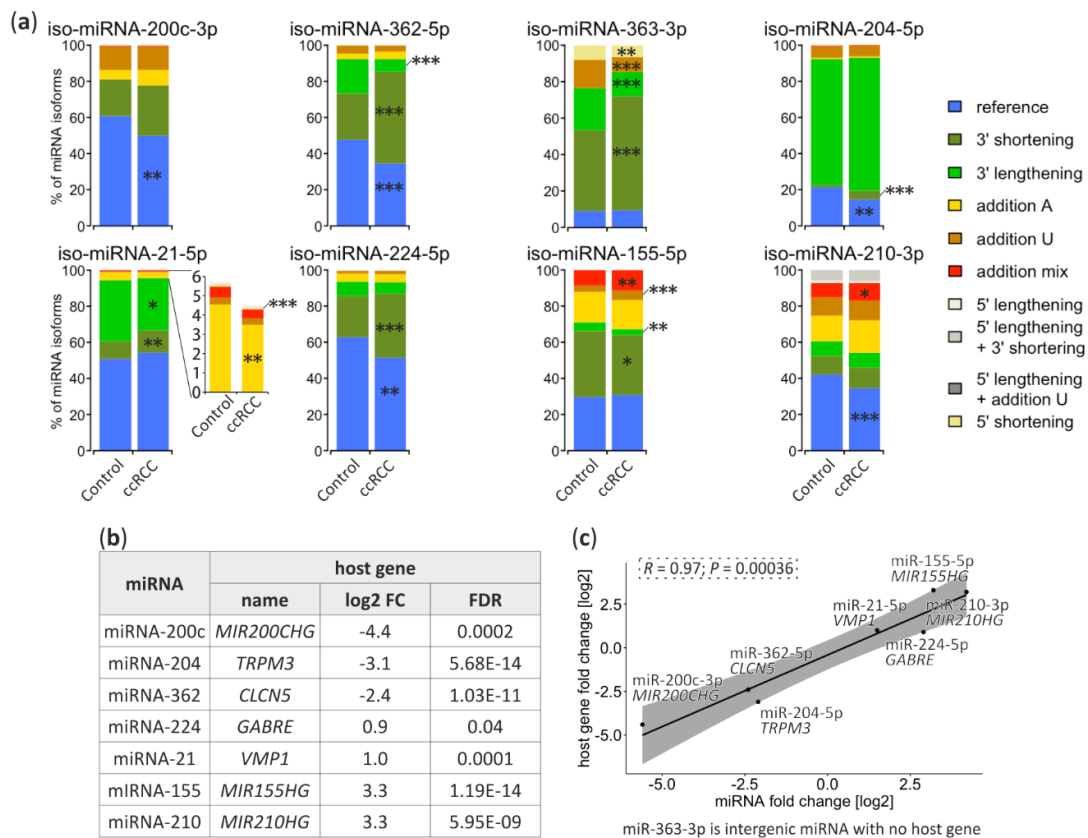

**Figure S3. Potential reasons of miRNA deregulation in ccRCC tumors.** (a) Isoforms of miRNA in ccRCC from Exp4 data set. Percentage of 8 commonly deregulated miRNA isoforms (iso-miRNA) in control and ccRCC tissues based on Exp4. Part of the chart represents the percentage of iso-miRNA-21-5p is magnified to show more accurately 3' tailing of miRNA-21-5p; (b, c) Co-transcriptional reason of miRNA deregulation in ccRCC. (a) Deregulation of host genes of 8 commonly deregulated miRNA in ccRCC based on RNA-Seq data. (b) Correlation of miRNA host genes and mature miRNA expression in ccRCC based on RNA-Seq and small RNA-Seq (Exp1) with exception of intergenic miRNA-363. FC, fold change; FDR, the false discovery rate.

(a) Targets of downregulated miRNA in ccRCC

miR-200c-3p targets

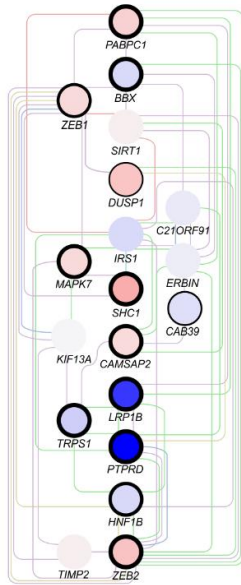

miR-362-5p targets

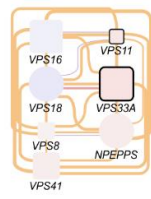

miR-363-3p targets

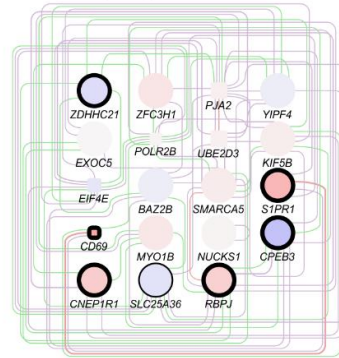

miR-204-5p targets

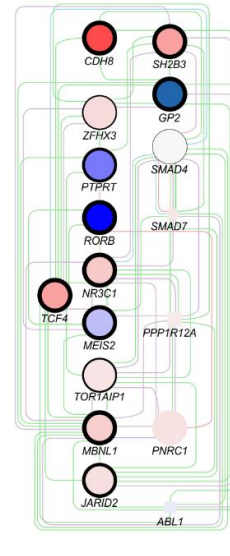

(b) Targets of upregulated miRNA in ccRCC

miR-21-5p targets

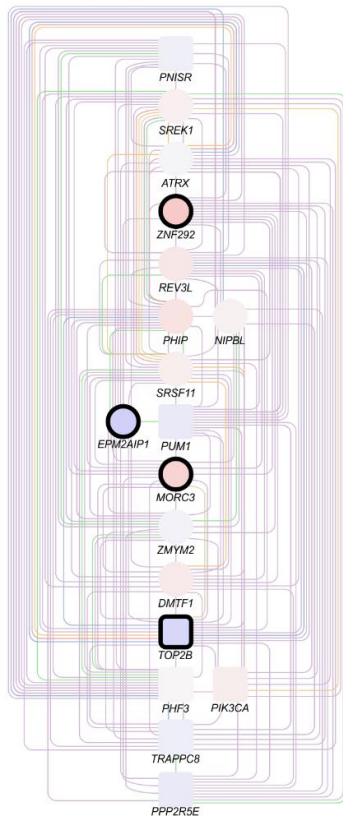

miR-224-5p targets

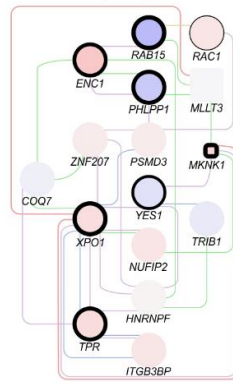

miR-210-3p targets

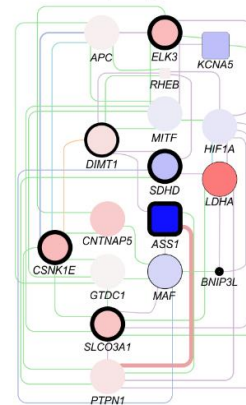

miR-155-5p targets

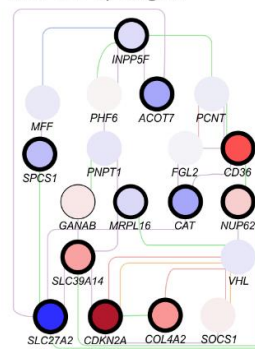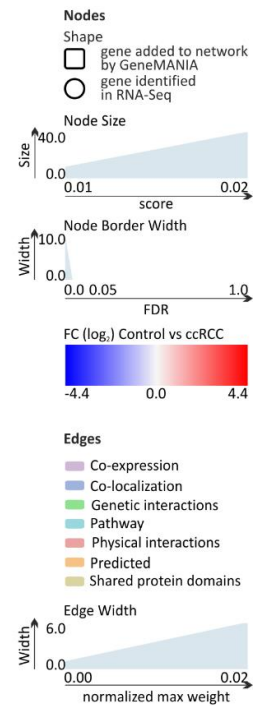

**Figure S4. miRNA function in ccRCC tumor.** The most probable clusters created with potential miRNA targets by GeneMANIA and MCODE. Clusters of targets of commonly downregulated (a) or upregulated (b) miRNA in ccRCC. Nodes, genes with expression level and FDR values based on RNA-Seq in ccRCC tumors; circle, potential miRNA targets (query genes); square, genes added by GeneMANIA to the network. Node size score, prediction of the genes relation provided by GeneMANIA; edge, line links two nodes, color and thickness represent kind and weight of the interaction, respectively.
