# Supplementary material for: Identification of RCC Subtype-Specific microRNAs–Meta-Analysis of High-Throughput RCC Tumor microRNA Expression Data
Source: Cancers (Basel). 2021 Feb 1;13(3):548. doi: 10.3390/cancers13030548 (PMC7867039; doi:10.3390/cancers13030548)
Supplement: Supplementary file 1 [file cancers-13-00548-s001.zip › Supplementary_File_S1.xlsx]

## Sheet: all_EXP_supp_table_1
Supplementary File S1. Differentialy expressed miRNA in all experiments used in the meta-analysis; red, upregulated; blue, downregulated
	ccRCC												pRCC			chRCC		Oncocytoma
miRNA.ID	logFC_EXP1	FDR_EXP1	logFC_EXP2	FDR_EXP2	logFC_EXP3	FDR_EXP3	logFC_EXP4	FDR_EXP4	logFC_EXP5	logFC_EXP6	logFC_EXP7	logFC_EXP8	logFC_EXP9	logFC_EXP10	logFC_EXP11	logFC_EXP12	logFC_EXP13	logFC_EXP14
hsa-let-7a-2-3p	NA	NA	NA	NA	NA	NA	NA	NA	-0.29285	NA	NA	NA	-0.510129	NA	NA	NA	NA	NA
hsa-let-7a-3p	NA	NA	NA	NA	NA	NA	-0.583644	0.0272203	0.318082	NA	NA	NA	NA	NA	NA	NA	NA	NA
hsa-let-7a-5p	NA	NA	NA	NA	NA	NA	-0.521683	0.0328021	-0.927645	NA	-0.42	NA	NA	NA	NA	-0.404576	NA	NA
hsa-let-7b-3p	NA	NA	NA	NA	NA	NA	-0.559102	0.0418262	0.236602	NA	NA	NA	NA	NA	NA	NA	NA	NA
hsa-let-7b-5p	-1.17302	0.0214166	NA	NA	NA	NA	-0.87804	1.35803e-05	0.727659	NA	NA	NA	-0.410975	NA	NA	-1.30954	NA	NA
hsa-let-7c-3p	NA	NA	NA	NA	NA	NA	-0.982239	0.00276112	-0.949171	NA	NA	NA	NA	NA	NA	-0.915233	NA	NA
hsa-let-7c-5p	-1.84494	4.69292e-05	NA	NA	NA	NA	-1.09377	1.37269e-06	-0.649729	NA	-0.46	NA	NA	NA	NA	-1.50135	NA	NA
hsa-let-7d-3p	NA	NA	NA	NA	NA	NA	NA	NA	0.188407	NA	NA	NA	0.247762	NA	NA	0.565755	NA	NA
hsa-let-7d-5p	NA	NA	NA	NA	NA	NA	NA	NA	-0.164341	NA	NA	NA	NA	NA	NA	NA	NA	NA
hsa-let-7e-3p	NA	NA	NA	NA	NA	NA	-1.02571	3.40959e-05	-1.09461	NA	NA	NA	-0.60756	NA	NA	-0.290821	NA	NA
hsa-let-7e-5p	NA	NA	NA	NA	NA	NA	-0.570403	0.0217403	-1.44815	NA	NA	NA	NA	NA	NA	NA	NA	NA
hsa-let-7f-1-3p	NA	NA	NA	NA	NA	NA	NA	NA	0.284854	NA	NA	NA	0.239822	NA	NA	0.383314	NA	NA
hsa-let-7f-5p	NA	NA	NA	NA	NA	NA	NA	NA	-1.27366	NA	NA	NA	0.411026	NA	NA	NA	NA	NA
hsa-let-7g-3p	NA	NA	NA	NA	NA	NA	NA	NA	NA	NA	NA	NA	0.366977	NA	NA	0.765537	NA	NA
hsa-let-7g-5p	-1.25623	0.0109391	NA	NA	NA	NA	-0.810066	9.48352e-05	-0.910936	NA	-0.35	NA	0.260549	0.52	NA	0.667329	NA	NA
hsa-let-7i-3p	NA	NA	NA	NA	NA	NA	0.956742	0.000367174	0.752105	NA	NA	NA	NA	NA	NA	NA	NA	NA
hsa-let-7i-5p	NA	NA	NA	NA	1.74005	0.00439886	0.889346	3.0099e-05	1.05155	0.63	0.59	NA	1.10937	0.88	NA	0.510001	NA	NA
hsa-miR-1	NA	NA	NA	NA	NA	NA	-1.79304	5.27312e-06	NA	NA	NA	NA	NA	NA	NA	NA	NA	NA
hsa-miR-1-3p	-1.84375	0.0207233	NA	NA	NA	NA	NA	NA	-1.14885	NA	NA	NA	-1.37094	NA	NA	-1.28783	NA	NA
hsa-miR-100--5p	NA	NA	NA	NA	NA	NA	NA	NA	NA	NA	NA	NA	NA	-1.35	NA	NA	NA	NA
hsa-miR-100-5p	NA	NA	NA	NA	NA	NA	NA	NA	NA	NA	NA	NA	-1.0085	NA	NA	-0.57743	NA	NA
hsa-miR-101-3p	NA	NA	NA	NA	NA	NA	NA	NA	0.710745	NA	NA	NA	NA	NA	NA	NA	NA	NA
hsa-miR-101-5p	NA	NA	NA	NA	NA	NA	NA	NA	-0.632854	NA	NA	NA	-0.676887	NA	NA	-0.398686	NA	NA
hsa-miR-103a-2-5p	NA	NA	NA	NA	NA	NA	NA	NA	0.190573	NA	NA	NA	NA	NA	NA	NA	NA	NA
hsa-miR-103a-3p	NA	NA	NA	NA	NA	NA	NA	NA	0.297988	NA	NA	NA	0.782763	NA	NA	-0.658978	NA	NA
hsa-miR-106a-3p	NA	NA	-2.38718	0.0323507	NA	NA	-1.60895	0.032179	NA	NA	NA	NA	NA	NA	NA	NA	NA	NA
hsa-miR-106a-5p	-3.42479	3.47684e-07	-2.23198	0.00550261	NA	NA	-1.70469	2.75832e-10	NA	0.77	NA	NA	NA	0.88	NA	-0.592415	NA	NA
hsa-miR-106b-3p	1.58521	0.00223898	NA	NA	NA	NA	1.38252	5.92866e-10	1.48737	NA	NA	NA	1.2544	NA	NA	1.43777	NA	NA
hsa-miR-106b-5p	NA	NA	NA	NA	1.61785	0.00439886	1.07916	2.09907e-06	1.07988	1.55	0.99	1.83	1.13745	2.06	NA	NA	NA	NA
hsa-miR-107	-1.26735	0.018911	NA	NA	NA	NA	NA	NA	0.450591	NA	NA	NA	0.379602	NA	NA	0.414351	NA	NA
hsa-miR-10a-3p	-1.63844	0.00443389	NA	NA	NA	NA	-1.36342	6.65099e-06	-0.615046	NA	NA	NA	NA	NA	NA	0.842382	NA	NA
hsa-miR-10a-5p	-1.87316	2.38144e-05	NA	NA	-1.5305	0.00950817	-1.53965	4.77898e-07	-1.56913	-1.12	-1.55	-0.74	NA	NA	NA	0.936242	NA	0.823129
hsa-miR-10b	NA	NA	NA	NA	NA	NA	NA	NA	NA	NA	NA	-0.83	NA	NA	NA	NA	NA	NA
hsa-miR-10b-3p	-1.52404	0.00571932	-1.78344	0.022445	NA	NA	-1.03159	8.9382e-05	-0.830697	NA	NA	NA	-1.79597	NA	NA	NA	NA	NA
hsa-miR-10b-5p	-1.46818	0.00117271	-1.58081	0.0424917	NA	NA	-1.17943	2.92256e-06	-0.700835	-1.34	-1.02	NA	-2.79897	-2.68	NA	-0.768826	NA	NA
hsa-miR-1180-3p	NA	NA	NA	NA	NA	NA	-0.756397	0.00571953	NA	NA	NA	NA	1.4877	NA	NA	-0.904208	NA	NA
hsa-miR-1183	NA	NA	NA	NA	-3.72239	0.0444759	NA	NA	NA	NA	NA	NA	NA	NA	NA	NA	NA	NA
hsa-miR-1185-5p	-5.06563	0.00101506	NA	NA	NA	NA	-1.57941	0.00972724	NA	NA	NA	NA	NA	NA	NA	NA	NA	NA
hsa-miR-122-5p	NA	NA	NA	NA	NA	NA	NA	NA	1.66543	NA	NA	2.81	NA	NA	NA	NA	NA	NA
hsa-miR-1226-3p	NA	NA	NA	NA	NA	NA	NA	NA	NA	NA	NA	NA	0.313128	NA	NA	NA	NA	NA
hsa-miR-1228-3p	NA	NA	NA	NA	NA	NA	1.85951	0.0023326	NA	NA	NA	NA	0.139624	NA	NA	NA	NA	NA
hsa-miR-1228-5p	NA	NA	NA	NA	NA	NA	NA	NA	NA	NA	NA	NA	0.103976	NA	NA	NA	NA	NA
hsa-miR-122a-5p	NA	NA	NA	NA	NA	NA	NA	NA	NA	NA	3.57	NA	NA	NA	NA	NA	NA	NA
hsa-miR-124-3-3p	NA	NA	NA	NA	NA	NA	NA	NA	NA	NA	NA	-1.19	NA	NA	NA	NA	NA	NA
hsa-miR-124-3p	-3.14543	0.00240574	NA	NA	-1.96364	0.0348387	-2.57471	0.00038067	NA	NA	NA	NA	NA	NA	NA	NA	NA	NA
hsa-miR-1247-3p	NA	NA	NA	NA	NA	NA	-1.22731	0.0233665	NA	NA	NA	NA	NA	NA	NA	-1.09048	NA	NA
hsa-miR-1247-5p	NA	NA	-2.65575	0.00287015	NA	NA	-1.24019	0.030645	NA	NA	NA	NA	NA	NA	NA	-0.496462	NA	NA
hsa-miR-1248	-1.93543	0.0262476	NA	NA	NA	NA	-3.44774	7.39766e-07	NA	NA	NA	1.04	NA	NA	NA	NA	NA	NA
hsa-miR-1249-3p	NA	NA	NA	NA	NA	NA	NA	NA	0.15791	NA	NA	NA	0.251886	NA	NA	0.187629	NA	NA
hsa-miR-1251-5p	-5.20444	1.39285e-09	-3.77294	0.000220459	NA	NA	-3.15345	2.61728e-05	-1.35321	NA	NA	NA	-1.5002	NA	NA	-1.88204	NA	NA
hsa-miR-1252-5p	NA	NA	NA	NA	NA	NA	-3.17643	0.00039961	NA	NA	NA	NA	NA	NA	NA	NA	NA	NA
hsa-miR-1254	NA	NA	NA	NA	NA	NA	NA	NA	NA	NA	NA	NA	0.191976	NA	NA	NA	NA	NA
hsa-miR-1255a	NA	NA	NA	NA	NA	NA	1.11507	0.0149516	NA	NA	NA	NA	NA	NA	NA	NA	NA	NA
hsa-miR-1255b-5p	NA	NA	3.15498	0.0432389	NA	NA	NA	NA	NA	NA	NA	NA	NA	NA	NA	NA	NA	NA
hsa-miR-1257	NA	NA	NA	NA	NA	NA	NA	NA	NA	NA	NA	NA	NA	NA	0.46	NA	NA	NA
hsa-miR-1258	NA	NA	NA	NA	NA	NA	NA	NA	NA	NA	NA	NA	NA	NA	NA	0.677914	NA	NA
hsa-miR-125a-3p	NA	NA	NA	NA	NA	NA	NA	NA	NA	NA	NA	NA	-0.340529	NA	NA	NA	NA	NA
hsa-miR-125a-5p	NA	NA	NA	NA	NA	NA	NA	NA	-0.899284	NA	-0.37	NA	-0.486163	-0.57	NA	NA	NA	NA
hsa-miR-125b-1-3p	NA	NA	NA	NA	NA	NA	-0.661823	0.0391021	NA	NA	NA	NA	NA	NA	NA	NA	NA	NA
hsa-miR-125b-2-3p	NA	NA	NA	NA	NA	NA	NA	NA	NA	NA	NA	NA	0.411915	NA	NA	NA	NA	NA
hsa-miR-125b-5p	NA	NA	NA	NA	NA	NA	-0.693656	0.00272618	-1.08488	NA	NA	NA	-0.656904	-0.66	NA	NA	NA	NA
hsa-miR-126-3p	NA	NA	NA	NA	NA	NA	0.901818	0.000679488	0.30865	NA	0.74	NA	-2.53921	-1.86	NA	-0.875836	NA	NA
hsa-miR-126-5p	NA	NA	NA	NA	NA	NA	1.04338	8.64146e-05	1.03606	NA	0.9	NA	-1.65856	NA	NA	NA	NA	NA
hsa-miR-1262	NA	NA	NA	NA	NA	NA	NA	NA	0.110133	NA	NA	NA	NA	NA	NA	NA	NA	NA
hsa-miR-1263	NA	NA	NA	NA	NA	NA	-4.1157	7.41056e-07	NA	NA	NA	NA	NA	NA	1.28	NA	NA	NA
hsa-miR-1266-5p	NA	NA	NA	NA	NA	NA	NA	NA	NA	NA	NA	NA	0.602314	NA	NA	0.765487	NA	NA
hsa-miR-1269a	NA	NA	-3.0563	0.00947737	NA	NA	-3.07252	0.0342801	NA	NA	NA	NA	NA	NA	NA	NA	NA	NA
hsa-miR-127-3p	-1.63834	0.00060499	NA	NA	NA	NA	-1.67152	0.0246679	-1.47046	-1.22	NA	-0.54	-2.10224	-2.42	-1.21	-1.82911	NA	NA
hsa-miR-127-5p	NA	NA	NA	NA	NA	NA	-1.44241	0.00121333	-1.03849	NA	NA	NA	-2.00927	NA	NA	-1.93876	NA	NA
hsa-miR-1270	2.3545	0.000109348	NA	NA	NA	NA	2.01259	1.026e-12	1.13806	NA	NA	2.46	0.77948	NA	NA	NA	NA	NA
hsa-miR-1271-5p	2.79758	0.000442376	NA	NA	NA	NA	1.70201	1.37269e-06	0.87042	NA	NA	1.63	NA	NA	NA	-0.505924	NA	NA
hsa-miR-1276	NA	NA	NA	NA	NA	NA	-1.14005	0.032745	NA	NA	NA	NA	NA	NA	NA	NA	NA	NA
hsa-miR-1277-3p	NA	NA	2.00387	0.0110356	NA	NA	NA	NA	0.241599	NA	NA	NA	0.132381	NA	NA	NA	NA	NA
hsa-miR-1277-5p	NA	NA	NA	NA	NA	NA	1.25258	0.023792	NA	NA	NA	NA	NA	NA	NA	NA	NA	NA
hsa-miR-128-1-5p	NA	NA	NA	NA	NA	NA	NA	NA	NA	NA	NA	NA	0.173382	NA	NA	-0.318153	NA	NA
hsa-miR-128-3p	NA	NA	NA	NA	NA	NA	NA	NA	0.387042	NA	NA	NA	0.753852	1.23	NA	NA	NA	NA
hsa-miR-1281	NA	NA	NA	NA	NA	NA	NA	NA	NA	NA	NA	0.95	NA	NA	2.62	NA	NA	NA
hsa-miR-1284	NA	NA	NA	NA	NA	NA	NA	NA	NA	NA	NA	NA	NA	NA	0.67	NA	NA	NA
hsa-miR-1285-3p	NA	NA	NA	NA	NA	NA	1.02872	0.037301	NA	NA	NA	NA	NA	NA	NA	NA	NA	NA
hsa-miR-1287-3p	NA	NA	NA	NA	NA	NA	NA	NA	0.325783	NA	NA	NA	0.69055	NA	NA	-0.499557	NA	NA
hsa-miR-1287-5p	NA	NA	NA	NA	NA	NA	NA	NA	0.501663	NA	NA	-0.65	1.06605	NA	NA	-1.17114	NA	NA
hsa-miR-1288-3p	NA	NA	NA	NA	NA	NA	NA	NA	NA	NA	NA	NA	0.15165	NA	NA	NA	NA	NA
hsa-miR-128b	NA	NA	NA	NA	NA	NA	NA	NA	NA	NA	NA	NA	NA	1.27	NA	NA	NA	NA
hsa-miR-129-1-3p	-4.45976	0.0120515	-5.54621	2.93733e-08	-3.51364	0.00235567	-4.79563	1.906e-15	NA	NA	NA	NA	NA	NA	NA	NA	NA	NA
hsa-miR-129-2-3p	NA	NA	-2.65971	0.00306681	-2.07724	0.0051647	-1.81385	0.0153234	NA	NA	NA	NA	NA	NA	NA	NA	NA	NA
hsa-miR-129-5p	NA	NA	-3.31807	0.000223648	-3.4474	0.00218552	-3.48482	2.85063e-16	-2.13	NA	NA	NA	-1.83854	NA	NA	NA	NA	NA
hsa-miR-1293	NA	NA	5.18719	9.09098e-05	NA	NA	NA	NA	NA	NA	NA	NA	NA	NA	NA	NA	NA	NA
hsa-miR-1295a	NA	NA	NA	NA	NA	NA	NA	NA	0.13348	NA	NA	NA	0.315683	NA	NA	NA	NA	NA
hsa-miR-1296-5p	NA	NA	NA	NA	NA	NA	-0.609886	0.0345579	-0.654293	NA	NA	NA	-0.473506	NA	NA	NA	NA	NA
hsa-miR-1301-3p	NA	NA	NA	NA	NA	NA	NA	NA	0.216545	NA	NA	NA	0.393941	NA	NA	0.252805	NA	NA
hsa-miR-1304-3p	NA	NA	NA	NA	NA	NA	0.908406	0.00753172	NA	NA	NA	NA	NA	NA	NA	NA	NA	NA
hsa-miR-1305	NA	NA	NA	NA	NA	NA	NA	NA	NA	NA	NA	NA	0.219529	NA	NA	NA	NA	NA
hsa-miR-1306-3p	NA	NA	NA	NA	NA	NA	NA	NA	NA	NA	NA	NA	0.060814	NA	NA	NA	NA	NA
hsa-miR-1306-5p	NA	NA	NA	NA	NA	NA	NA	NA	NA	NA	NA	NA	NA	NA	NA	0.564091	NA	NA
hsa-miR-1307-3p	NA	NA	NA	NA	NA	NA	NA	NA	-0.228583	NA	NA	NA	1.1617	NA	NA	0.665362	NA	NA
hsa-miR-1307-5p	NA	NA	NA	NA	NA	NA	0.73568	0.0136839	1.86564	NA	NA	NA	1.71761	NA	NA	0.514202	NA	NA
hsa-miR-1308	NA	NA	NA	NA	NA	NA	NA	NA	NA	NA	NA	NA	NA	NA	1.55	NA	NA	NA
hsa-miR-130a-3p	NA	NA	NA	NA	NA	NA	NA	NA	-0.676856	-1.11	NA	NA	NA	NA	NA	-2.35296	-2.64	NA
hsa-miR-130a-5p	NA	NA	NA	NA	NA	NA	NA	NA	-0.153873	NA	NA	NA	-0.153963	NA	NA	-0.277045	NA	NA
hsa-miR-130b-3p	1.82526	0.00172891	NA	NA	2.18917	0.000559055	1.24204	6.15742e-08	0.791693	1.43	1.55	0.63	0.821	0.92	NA	NA	NA	NA
hsa-miR-130b-5p	NA	NA	NA	NA	NA	NA	1.00317	6.77495e-05	0.664382	NA	NA	NA	0.774116	NA	NA	NA	NA	NA
hsa-miR-132-3p	NA	NA	NA	NA	NA	NA	NA	NA	NA	NA	NA	NA	0.640659	NA	NA	-0.706305	NA	NA
hsa-miR-132-5p	NA	NA	NA	NA	NA	NA	NA	NA	-0.153829	NA	NA	NA	NA	NA	NA	-0.474011	NA	NA
hsa-miR-1323	NA	NA	NA	NA	NA	NA	NA	NA	NA	NA	NA	NA	NA	NA	1.41	NA	NA	NA
hsa-miR-133a-3p	NA	NA	NA	NA	NA	NA	NA	NA	-0.35321	NA	NA	NA	-0.771375	NA	NA	-0.750861	NA	NA
hsa-miR-133b	NA	NA	NA	NA	NA	NA	-1.81609	0.0285101	NA	NA	NA	NA	NA	NA	NA	NA	NA	NA
hsa-miR-134-3p	NA	NA	NA	NA	NA	NA	-2.33755	0.000438327	NA	NA	NA	NA	NA	NA	NA	NA	NA	NA
hsa-miR-134-5p	-2.24035	0.0014185	NA	NA	NA	NA	-2.15363	3.13494e-07	-0.524072	NA	NA	NA	-1.50337	-1.12	NA	-1.57261	NA	NA
hsa-miR-1343-3p	NA	NA	NA	NA	NA	NA	NA	NA	NA	NA	NA	NA	NA	NA	NA	0.184886	NA	NA
hsa-miR-135a-5p	-4.68251	3.38184e-19	-3.4973	8.21244e-05	-1.84651	0.0444759	-3.24286	1.81014e-07	-0.851766	NA	-2.12	NA	-0.792266	NA	NA	-0.737961	NA	NA
hsa-miR-135b-3p	NA	NA	NA	NA	NA	NA	-1.46084	0.0110034	NA	NA	NA	NA	0.140204	NA	NA	NA	NA	NA
hsa-miR-135b-5p	-2.47489	0.000942639	NA	NA	NA	NA	-1.36826	0.00272618	NA	NA	NA	NA	1.39118	NA	NA	NA	NA	NA
hsa-miR-136-3p	-2.94308	8.0819e-09	NA	NA	NA	NA	-2.14947	0.000206937	-0.464217	NA	NA	NA	-0.949356	NA	NA	-1.1533	NA	NA
hsa-miR-136-5p	-3.06293	7.88562e-08	NA	NA	NA	NA	-2.06678	0.000482852	-1.09331	NA	NA	NA	-1.30874	NA	NA	-1.57354	NA	NA
hsa-miR-138-1-3p	-5.59474	1.53083e-05	-2.28785	0.0426697	-2.71351	0.0171471	-5.28313	9.42424e-09	NA	NA	NA	NA	-0.227622	NA	NA	NA	NA	NA
hsa-miR-138-2-3p	NA	NA	NA	NA	NA	NA	-2.18441	0.00313168	NA	NA	NA	-1.12	NA	NA	NA	NA	NA	NA
hsa-miR-138-5p	-4.94098	8.0318e-18	NA	NA	-3.54107	1.24505e-07	-4.60311	6.36053e-15	NA	NA	-2.95	NA	NA	NA	NA	NA	NA	NA
hsa-miR-139-3p	-2.1866	0.0145818	NA	NA	NA	NA	NA	NA	-0.654393	NA	NA	NA	-2.21525	NA	NA	-0.660576	NA	NA
hsa-miR-139-5p	NA	NA	NA	NA	-1.49601	0.0255402	-1.12595	0.00035016	-0.719736	NA	NA	NA	-2.11586	-4.2	-1.33	NA	NA	NA
hsa-miR-140-3p	NA	NA	NA	NA	NA	NA	NA	NA	0.570459	NA	NA	NA	NA	NA	NA	-0.334073	NA	NA
hsa-miR-140-5p	NA	NA	NA	NA	NA	NA	NA	NA	0.447521	NA	NA	0.55	-0.359423	NA	NA	NA	NA	NA
hsa-miR-141-3p	-5.46552	2.62405e-27	-2.90492	0.00194745	-2.00231	0.00184732	-4.74076	8.86408e-51	-4.84363	NA	-4.16	-0.71	-3.78028	NA	NA	1.72532	NA	NA
hsa-miR-141-5p	-6.25413	4.09906e-08	NA	NA	NA	NA	-5.63883	6.56684e-21	-3.99004	NA	NA	NA	-3.66957	NA	NA	1.84439	NA	NA
hsa-miR-142-3p	1.40815	0.0110022	2.03318	0.00704277	2.57383	0.000375883	2.09047	1.85522e-12	2.32046	NA	1.44	NA	0.956328	NA	NA	NA	NA	NA
hsa-miR-142-5p	1.67664	0.000256532	1.69407	0.0323507	1.46156	0.0309704	2.0114	2.53472e-10	1.7401	NA	1.55	NA	1.21727	NA	NA	0.568612	NA	NA
hsa-miR-143-3p	NA	NA	NA	NA	NA	NA	NA	NA	0.668828	NA	0.57	NA	-1.82073	-2.97	-1.62	-1.30688	-1.51	NA
hsa-miR-143-5p	NA	NA	NA	NA	NA	NA	0.903183	0.000548437	0.603974	NA	NA	NA	-1.80384	NA	NA	-1.25791	NA	NA
hsa-miR-144-3p	NA	NA	1.85027	0.0323507	NA	NA	1.24704	0.00618469	1.06619	NA	NA	NA	NA	NA	NA	0.894017	NA	NA
hsa-miR-144-5p	NA	NA	NA	NA	NA	NA	1.04623	0.0149516	1.60784	NA	NA	NA	NA	NA	NA	1.1787	NA	NA
hsa-miR-145-3p	NA	NA	NA	NA	NA	NA	NA	NA	0.394647	NA	NA	NA	-1.43135	NA	NA	-1.00407	NA	NA
hsa-miR-145-5p	NA	NA	NA	NA	NA	NA	NA	NA	-0.463991	-1.14	NA	NA	-2.62525	-3.73	-1.2	-1.82336	NA	-1.98126
hsa-miR-1468-5p	NA	NA	NA	NA	NA	NA	NA	NA	-0.329877	NA	NA	NA	NA	NA	NA	1.05882	NA	NA
hsa-miR-146a-5p	NA	NA	NA	NA	NA	NA	NA	NA	1.21895	NA	0.94	0.55	1.73578	1.79	NA	-0.546928	NA	NA
hsa-miR-146b-3p	NA	NA	NA	NA	NA	NA	0.998825	0.0483636	0.962366	NA	NA	NA	0.98984	NA	NA	-0.717566	NA	NA
hsa-miR-146b-5p	NA	NA	NA	NA	1.80782	0.00809846	NA	NA	1.36617	NA	NA	NA	1.41251	NA	NA	-0.581376	NA	-2.39203
hsa-miR-147b	NA	NA	NA	NA	NA	NA	2.29247	1.11451e-12	NA	NA	NA	NA	NA	NA	NA	NA	NA	NA
hsa-miR-148a-3p	NA	NA	NA	NA	1.46194	0.0406553	NA	NA	NA	NA	NA	NA	NA	1.17	NA	NA	NA	NA
hsa-miR-148a-5p	NA	NA	NA	NA	NA	NA	NA	NA	0.600302	NA	NA	NA	0.478334	NA	NA	0.462657	NA	NA
hsa-miR-148b-3p	NA	NA	NA	NA	NA	NA	NA	NA	NA	NA	NA	NA	0.753431	NA	NA	0.565172	NA	NA
hsa-miR-148b-5p	NA	NA	NA	NA	NA	NA	NA	NA	0.0887143	NA	NA	NA	NA	NA	NA	NA	NA	NA
hsa-miR-149-5p	NA	NA	NA	NA	NA	NA	-1.57602	7.08499e-08	-1.37534	NA	NA	NA	NA	NA	NA	-0.718427	NA	NA
hsa-miR-150-3p	NA	NA	NA	NA	NA	NA	0.970905	0.0328021	0.175467	NA	NA	NA	NA	NA	NA	NA	NA	NA
hsa-miR-150-5p	1.68517	0.00122716	NA	NA	NA	NA	1.49108	1.02135e-05	0.788871	NA	NA	NA	NA	1.13	NA	-0.67282	NA	NA
hsa-miR-151-3p	NA	NA	NA	NA	NA	NA	NA	NA	NA	NA	NA	NA	NA	0.48	NA	NA	NA	NA
hsa-miR-151a-3p	NA	NA	NA	NA	NA	NA	NA	NA	0.624156	0.59	NA	0.27	0.523266	NA	NA	0.576349	NA	NA
hsa-miR-151a-5p	NA	NA	NA	NA	NA	NA	NA	NA	NA	NA	NA	NA	0.287894	NA	NA	NA	NA	NA
hsa-miR-151b	NA	NA	NA	NA	NA	NA	0.715568	0.0110055	0.668247	NA	NA	NA	NA	NA	NA	NA	NA	NA
hsa-miR-152-3p	NA	NA	NA	NA	NA	NA	NA	NA	0.252874	NA	NA	NA	NA	NA	NA	-0.725763	NA	NA
hsa-miR-152-5p	NA	NA	NA	NA	NA	NA	NA	NA	NA	NA	NA	NA	0.0924488	NA	NA	NA	NA	NA
hsa-miR-153-3p	NA	NA	NA	NA	NA	NA	1.09127	0.000620403	0.107713	NA	NA	NA	NA	NA	NA	NA	NA	NA
hsa-miR-153-5p	NA	NA	NA	NA	NA	NA	NA	NA	1.03891	NA	NA	NA	NA	NA	NA	0.498899	NA	NA
hsa-miR-1538	NA	NA	NA	NA	NA	NA	0.967321	0.0153045	NA	NA	NA	NA	NA	NA	NA	NA	NA	NA
hsa-miR-154-5p	NA	NA	NA	NA	NA	NA	-2.61751	8.80866e-09	-0.725109	NA	NA	NA	-0.822314	NA	NA	-0.700752	NA	NA
hsa-miR-155-5p	3.15834	1.02619e-12	2.38189	0.00223301	3.68998	2.14248e-08	3.19657	1.8962e-19	3.3251	2.56	2.3	1.24	1.6319	2.05	NA	NA	NA	NA
hsa-miR-15a-5p	NA	NA	NA	NA	1.8019	0.00212339	1.31729	5.57124e-10	1.23714	1.23	0.84	0.47	0.880047	NA	NA	0.753819	NA	1.48067
hsa-miR-15b-3p	NA	NA	NA	NA	NA	NA	1.33453	2.9247e-05	1.48267	NA	NA	NA	0.800552	NA	NA	1.28446	NA	NA
hsa-miR-15b-5p	NA	NA	NA	NA	NA	NA	0.793771	0.000504523	0.508508	1.22	0.78	0.66	0.770344	NA	NA	1.40591	NA	1.18976
hsa-miR-16-1-3p	NA	NA	1.80759	0.0426697	NA	NA	NA	NA	0.761883	NA	NA	NA	0.596575	NA	NA	0.577377	NA	NA
hsa-miR-16-2-3p	NA	NA	NA	NA	1.86784	0.00637598	1.41196	1.70808e-08	0.750054	NA	NA	NA	0.27273	NA	NA	0.748053	NA	NA
hsa-miR-16-5p	NA	NA	NA	NA	1.2891	0.0497314	1.03425	9.41735e-07	1.2025	NA	0.77	NA	NA	NA	NA	0.721113	NA	NA
hsa-miR-17-3p	NA	NA	NA	NA	1.63819	0.00710968	0.547155	0.0497886	0.427403	0.85	0.56	NA	0.863168	0.83	NA	-0.232876	NA	NA
hsa-miR-17-5p	NA	NA	NA	NA	NA	NA	NA	NA	0.445231	0.75	NA	NA	0.925249	0.8	NA	NA	NA	NA
hsa-miR-181a-2-3p	NA	NA	NA	NA	NA	NA	0.633203	0.0402068	0.2427	NA	NA	NA	0.347639	NA	NA	NA	NA	NA
hsa-miR-181a-3p	NA	NA	NA	NA	1.56047	0.0384894	0.822437	0.00263659	0.875221	NA	0.75	NA	0.718407	NA	NA	-1.16677	NA	NA
hsa-miR-181a-5p	NA	NA	NA	NA	1.36719	0.0378157	0.797511	0.000472857	1.0982	0.49	0.76	NA	0.461003	NA	NA	-0.735211	NA	NA
hsa-miR-181b-2-3p	NA	NA	NA	NA	NA	NA	NA	NA	0.398326	NA	NA	NA	NA	NA	NA	NA	NA	NA
hsa-miR-181b-3p	NA	NA	NA	NA	NA	NA	0.749723	0.0412153	1.19622	NA	NA	NA	0.401226	NA	NA	-0.286024	NA	NA
hsa-miR-181b-5p	1.13748	0.0332091	NA	NA	2.14296	0.000375883	1.07207	3.518e-07	1.36239	0.82	0.98	NA	0.727439	NA	NA	-0.593117	NA	NA
hsa-miR-181c-3p	NA	NA	NA	NA	NA	NA	NA	NA	0.258484	NA	NA	NA	1.61622	NA	NA	-1.15961	NA	NA
hsa-miR-181c-5p	NA	NA	NA	NA	2.47473	0.00218552	0.989093	0.00035016	0.689874	NA	0.84	NA	1.46658	NA	NA	-0.992785	NA	NA
hsa-miR-181d-5p	NA	NA	NA	NA	NA	NA	0.987268	0.000417302	0.60186	NA	0.98	0.86	1.19845	0.75	NA	-0.966491	NA	NA
hsa-miR-182-5p	NA	NA	NA	NA	NA	NA	-1.40175	1.20539e-06	NA	NA	NA	NA	2.01095	2.77	NA	2.66453	4.16	4.78255
hsa-miR-1825	NA	NA	NA	NA	NA	NA	NA	NA	NA	NA	NA	NA	NA	NA	2.11	NA	NA	NA
hsa-miR-1826	NA	NA	NA	NA	NA	NA	NA	NA	NA	NA	NA	-0.72	NA	NA	NA	NA	NA	NA
hsa-miR-183-3p	NA	NA	NA	NA	NA	NA	-1.30023	0.0207653	NA	NA	NA	NA	NA	NA	NA	0.18764	NA	NA
hsa-miR-183-5p	NA	NA	NA	NA	NA	NA	-1.78993	1.54576e-09	-0.996263	NA	NA	NA	1.8297	2.75	NA	2.91029	NA	5.12437
hsa-miR-184	-5.25774	6.66437e-17	-4.77754	2.22279e-09	-4.45764	0.00010862	-6.84578	7.9392e-51	NA	NA	-1.83	-2.83	NA	NA	NA	-2.17992	NA	NA
hsa-miR-185-3p	NA	NA	NA	NA	NA	NA	NA	NA	0.606302	NA	NA	NA	0.695573	NA	NA	1.58544	NA	NA
hsa-miR-185-5p	NA	NA	NA	NA	1.66471	0.00530956	NA	NA	0.895607	0.83	NA	0.32	1.4239	1.22	NA	1.95827	1.43	2.48692
hsa-miR-186-5p	NA	NA	NA	NA	NA	NA	NA	NA	0.717085	NA	NA	NA	0.406869	NA	NA	NA	NA	NA
hsa-miR-187-3p	-4.54454	1.07371e-11	-3.47858	0.000304686	-2.33264	0.00268935	-3.45806	6.89698e-11	-1.95638	-2.61	NA	-2.14	-2.32464	-4.11	NA	3.34775	NA	NA
hsa-miR-187-5p	NA	NA	-2.58629	0.0136604	NA	NA	-2.22254	0.0402068	NA	NA	NA	NA	NA	NA	NA	0.192956	NA	NA
hsa-miR-188-3p	-5.09417	0.000459891	-2.81938	0.0377414	NA	NA	-1.74116	9.99273e-06	-1.0067	NA	NA	NA	-0.614487	NA	NA	NA	NA	NA
hsa-miR-188-5p	-1.69796	0.00664378	-1.96829	0.0179117	NA	NA	-1.30399	5.62066e-06	-1.06816	NA	-0.92	NA	-0.572361	NA	NA	0.573338	2.92	1.55795
hsa-miR-18a-3p	NA	NA	NA	NA	2.80556	0.00382216	1.29629	1.81737e-06	0.112383	NA	0.7	NA	0.0765031	NA	NA	0.0711169	NA	NA
hsa-miR-18a-5p	NA	NA	NA	NA	1.84223	0.00268935	NA	NA	0.561068	2.23	1.13	0.78	0.515609	1.67	NA	NA	NA	NA
hsa-miR-18b-5p	NA	NA	NA	NA	NA	NA	NA	NA	NA	NA	NA	NA	NA	NA	NA	0.0994563	NA	NA
hsa-miR-1908-3p	NA	NA	NA	NA	NA	NA	1.60078	0.0330523	NA	NA	NA	NA	NA	NA	NA	NA	NA	NA
hsa-miR-190a-3p	-2.27261	0.000833476	NA	NA	NA	NA	-1.40832	5.48441e-05	NA	NA	NA	NA	-0.259967	NA	NA	NA	NA	NA
hsa-miR-190a-5p	-3.48356	1.10359e-13	NA	NA	NA	NA	-2.25375	2.99157e-14	0.295007	NA	NA	NA	NA	NA	NA	-1.31913	NA	NA
hsa-miR-191-3p	NA	NA	NA	NA	NA	NA	NA	NA	-0.125079	NA	NA	NA	NA	1.51	NA	NA	NA	NA
hsa-miR-191-5p	NA	NA	NA	NA	NA	NA	NA	NA	-0.358233	NA	NA	NA	0.73924	1.11	NA	1.00686	NA	NA
hsa-miR-1910-5p	NA	NA	NA	NA	NA	NA	3.34254	8.25316e-12	NA	NA	NA	NA	NA	NA	NA	NA	NA	NA
hsa-miR-1915-5p	NA	NA	NA	NA	NA	NA	-2.37244	0.0140795	NA	NA	NA	NA	NA	NA	NA	NA	NA	NA
hsa-miR-192-3p	-2.01063	0.00117271	NA	NA	NA	NA	NA	NA	NA	NA	NA	NA	-1.02064	NA	NA	-1.99853	NA	NA
hsa-miR-192-5p	-2.21506	1.28445e-07	NA	NA	NA	NA	NA	NA	NA	-1.64	NA	NA	-1.50416	-2.14	NA	-2.93406	-6.33	-6.67363
hsa-miR-193a-3p	NA	NA	NA	NA	2.57078	6.0127e-06	1.39153	1.04327e-08	0.660571	NA	1.21	1.66	0.353589	NA	NA	-0.558995	NA	NA
hsa-miR-193a-5p	NA	NA	NA	NA	NA	NA	NA	NA	1.02245	NA	NA	NA	1.04702	NA	NA	-0.60875	NA	NA
hsa-miR-193b-3p	NA	NA	NA	NA	NA	NA	NA	NA	-0.327722	NA	NA	NA	NA	NA	NA	0.652243	NA	2.37424
hsa-miR-193b-5p	NA	NA	NA	NA	NA	NA	NA	NA	0.272617	NA	NA	NA	0.335668	NA	NA	0.651194	NA	NA
hsa-miR-194-3p	-2.60484	1.01019e-05	NA	NA	NA	NA	-1.96776	0.000397467	NA	NA	NA	NA	-0.975316	NA	NA	-1.6645	NA	NA
hsa-miR-194-5p	-2.3603	1.27248e-07	NA	NA	NA	NA	NA	NA	0.630604	-2.31	NA	NA	-1.10882	-2.37	NA	-2.57092	-6.38	-6.43629
hsa-miR-195-3p	NA	NA	NA	NA	NA	NA	0.880956	0.000878931	0.384836	NA	NA	NA	-0.387398	NA	NA	-0.496111	NA	NA
hsa-miR-195-5p	NA	NA	NA	NA	NA	NA	NA	NA	0.258077	NA	NA	0.55	-1.58128	-1.32	NA	-1.06877	-1.58	-1.04382
hsa-miR-196a-3p	-1.34496	0.0454981	NA	NA	NA	NA	NA	NA	NA	NA	NA	NA	NA	NA	NA	NA	NA	NA
hsa-miR-196a-5p	NA	NA	NA	NA	NA	NA	NA	NA	0.667211	NA	NA	NA	NA	NA	NA	-1.91444	NA	NA
hsa-miR-196b-3p	NA	NA	NA	NA	NA	NA	NA	NA	NA	NA	NA	NA	0.183182	NA	NA	NA	NA	NA
hsa-miR-196b-5p	NA	NA	NA	NA	NA	NA	NA	NA	0.629423	NA	NA	NA	1.17941	NA	NA	-0.836464	NA	NA
hsa-miR-197-3p	1.21798	0.0368015	NA	NA	NA	NA	NA	NA	NA	NA	0.54	1.06	0.302698	NA	NA	NA	NA	NA
hsa-miR-1976	NA	NA	NA	NA	NA	NA	NA	NA	NA	NA	NA	NA	0.74744	NA	NA	0.502878	NA	NA
hsa-miR-199a-3p	-2.06472	5.84014e-06	NA	NA	NA	NA	-1.44289	2.9247e-05	-1.26094	-1.21	NA	NA	-2.6621	-3.7	NA	-2.92362	-2.85	-2.78869
hsa-miR-199a-5p	-1.59725	0.00162681	NA	NA	NA	NA	-1.48834	1.26476e-05	-1.64983	-2.94	NA	NA	-2.13141	-4.83	NA	-2.86099	-4.51	-3.65838
hsa-miR-199b-3p	-2.02193	1.34383e-05	NA	NA	NA	NA	-1.44292	3.16266e-05	-1.23823	NA	NA	NA	-2.68702	NA	NA	-2.96216	NA	NA
hsa-miR-199b-5p	-1.93445	0.0093926	NA	NA	-2.05426	0.00291546	-2.53764	6.93128e-05	-1.52691	NA	NA	-0.44	-1.15703	NA	-1.53	-1.14402	NA	NA
hsa-miR-19a-3p	NA	NA	NA	NA	1.32832	0.0438709	NA	NA	0.908702	NA	NA	NA	0.926619	NA	NA	NA	NA	NA
hsa-miR-19a-5p	NA	NA	NA	NA	NA	NA	1.63219	0.00811155	NA	NA	NA	NA	NA	NA	NA	NA	NA	NA
hsa-miR-19b-1-5p	NA	NA	NA	NA	NA	NA	NA	NA	0.494122	NA	NA	NA	0.846468	NA	NA	NA	NA	NA
hsa-miR-19b-3p	NA	NA	NA	NA	NA	NA	NA	NA	0.368913	NA	NA	NA	0.648922	NA	NA	-0.340516	NA	NA
hsa-miR-200a-3p	-2.14263	3.02303e-06	NA	NA	NA	NA	-1.30384	2.85584e-09	-1.65373	-1.77	-1.76	-1.79	NA	NA	NA	-0.723302	NA	NA
hsa-miR-200a-5p	-2.54544	8.64076e-06	NA	NA	NA	NA	-1.79978	2.74458e-13	-1.50857	-0.82	-1.21	NA	NA	0.5	NA	NA	NA	NA
hsa-miR-200b-3p	-1.8988	3.08406e-05	NA	NA	-2.0426	0.000216717	-1.86754	6.36053e-15	-1.62555	-1.21	-2.09	-1.46	NA	NA	NA	NA	NA	NA
hsa-miR-200b-5p	NA	NA	NA	NA	-1.59171	0.0277086	-1.66123	1.95195e-09	-0.972684	NA	NA	NA	NA	NA	NA	NA	NA	NA
hsa-miR-200c-3p	-5.62162	7.34143e-25	-4.0081	5.53591e-07	-5.70622	2.32272e-27	-6.00919	3.76738e-64	-5.19918	-4.45	-4.12	-2.26	-4.44346	-5.13	-3.12	NA	NA	NA
hsa-miR-200c-5p	NA	NA	NA	NA	NA	NA	-4.3525	2.75832e-10	NA	NA	NA	NA	NA	NA	NA	1.1804	NA	NA
hsa-miR-202-3p	NA	NA	NA	NA	NA	NA	NA	NA	NA	NA	NA	NA	NA	NA	0.74	NA	NA	NA
hsa-miR-203a-3p	NA	NA	NA	NA	NA	NA	NA	NA	-1.88553	NA	NA	NA	-2.51973	NA	-0.68	-1.72226	NA	NA
hsa-miR-203b-3p	NA	NA	NA	NA	NA	NA	-2.49587	0.00177605	-1.71095	NA	NA	NA	-1.09156	NA	NA	-0.693643	NA	NA
hsa-miR-204-3p	NA	NA	-2.5157	0.00223301	-2.64039	6.0127e-06	-1.87279	8.45379e-08	-0.410713	NA	NA	NA	NA	NA	NA	NA	NA	NA
hsa-miR-204-5p	-2.11314	1.11778e-06	-3.41961	7.9299e-06	-2.61172	4.37419e-06	-1.8127	9.36422e-08	-2.15516	-3.31	-1.85	-1.92	-0.933799	NA	NA	-5.44471	-6.85	-7.58793
hsa-miR-205-5p	NA	NA	NA	NA	-3.83389	0.00145825	-2.98712	0.00255324	NA	NA	NA	NA	NA	NA	NA	NA	NA	NA
hsa-miR-206	NA	NA	-4.11663	1.4266e-06	-4.34413	0.000174248	-4.04642	2.2705e-06	NA	NA	NA	-1.14	-1.70624	NA	-0.58	NA	NA	NA
hsa-miR-208b-3p	NA	NA	NA	NA	NA	NA	-2.27734	0.0128858	NA	NA	NA	NA	NA	NA	NA	NA	NA	NA
hsa-miR-20a-5p	-1.1507	0.0492115	NA	NA	NA	NA	NA	NA	0.45486	0.88	NA	NA	1.05832	0.89	NA	NA	NA	NA
hsa-miR-20b-3p	NA	NA	-2.18614	0.0147999	NA	NA	-2.07112	4.54268e-05	-0.848814	NA	NA	NA	-0.37562	NA	NA	-0.588389	NA	NA
hsa-miR-20b-5p	-3.57316	2.04757e-10	-2.62713	0.000431077	-1.5502	0.0159134	-2.24546	7.53116e-12	-1.27483	0.86	NA	-0.57	-0.621037	1.02	-1.01	-0.820281	NA	NA
hsa-miR-21-3p	1.39466	0.00819956	1.96386	0.0147587	2.94595	2.28795e-06	1.9613	9.00723e-17	1.45393	NA	NA	NA	2.0295	NA	NA	-1.42919	NA	NA
hsa-miR-21-5p	1.45074	0.00162681	2.09837	0.00287015	2.98729	2.25024e-08	1.95344	3.06698e-17	2.47615	1.91	1.06	1.94	3.42836	2.55	NA	NA	NA	NA
hsa-miR-210-3p	4.15102	2.35385e-19	3.03047	9.09098e-05	4.15377	1.34057e-14	3.95567	1.1404e-42	3.56789	3.53	3.3	3.78	2.23623	2.58	NA	NA	NA	NA
hsa-miR-210-5p	3.27897	4.94429e-09	NA	NA	2.77955	1.06566e-05	3.37251	8.18492e-28	0.260483	NA	NA	NA	0.2446	NA	NA	NA	NA	NA
hsa-miR-211-5p	-4.22296	6.18033e-05	NA	NA	NA	NA	NA	NA	NA	NA	NA	NA	0.78293	NA	NA	NA	NA	NA
hsa-miR-2114-3p	NA	NA	NA	NA	NA	NA	1.01216	0.0230419	NA	NA	NA	NA	NA	NA	NA	NA	NA	NA
hsa-miR-2116-3p	NA	NA	NA	NA	NA	NA	NA	NA	NA	NA	NA	NA	0.0946393	NA	NA	NA	NA	NA
hsa-miR-212-3p	NA	NA	NA	NA	NA	NA	NA	NA	NA	0.67	0.64	NA	-0.325857	NA	NA	-0.599489	NA	NA
hsa-miR-214-3p	NA	NA	NA	NA	NA	NA	NA	NA	-0.621788	NA	NA	-1.03	-0.954853	-2.72	-1.75	-0.775739	-1.68	-1.87628
hsa-miR-214-5p	NA	NA	NA	NA	NA	NA	NA	NA	-0.977315	NA	NA	NA	-1.47864	NA	NA	-1.81423	NA	NA
hsa-miR-215-5p	-1.67728	0.000761768	NA	NA	NA	NA	NA	NA	1.91115	-2.33	NA	NA	-1.4419	-3.62	NA	-1.45958	-7.88	-7.92827
hsa-miR-216a-3p	-4.51832	0.0196477	NA	NA	NA	NA	-1.57696	0.0397836	NA	NA	NA	NA	NA	NA	NA	NA	NA	NA
hsa-miR-216a-5p	-4.708	5.84014e-06	NA	NA	NA	NA	-1.65128	0.0231341	NA	NA	NA	NA	NA	NA	NA	NA	NA	NA
hsa-miR-216b-5p	-6.84524	6.3581e-09	-5.79444	1.33452e-09	-3.80771	0.000534952	-4.91814	6.44398e-22	NA	NA	NA	NA	NA	NA	0.72	NA	NA	NA
hsa-miR-217	-6.55683	5.01252e-08	-2.50507	0.0228722	NA	NA	-2.89603	3.4067e-06	-1.25677	NA	NA	-0.88	-3.22663	NA	NA	-2.12434	NA	NA
hsa-miR-218-1-3p	-2.96847	1.29947e-06	NA	NA	NA	NA	-1.94813	0.000703118	NA	NA	NA	NA	NA	NA	NA	0.829915	NA	NA
hsa-miR-218-5p	-3.08202	1.6081e-09	NA	NA	NA	NA	-1.75185	8.98356e-06	-0.356295	NA	NA	NA	NA	NA	NA	2.24836	NA	3.00462
hsa-miR-219a-1-3p	NA	NA	NA	NA	NA	NA	NA	NA	0.160591	NA	NA	NA	0.806134	NA	NA	-0.20185	NA	NA
hsa-miR-219a-5p	NA	NA	NA	NA	NA	NA	NA	NA	NA	NA	NA	NA	0.298959	NA	NA	NA	NA	NA
hsa-miR-22-3p	NA	NA	NA	NA	NA	NA	NA	NA	-0.217365	NA	NA	NA	NA	NA	NA	1.05841	NA	1.07543
hsa-miR-22-5p	NA	NA	NA	NA	NA	NA	NA	NA	NA	NA	NA	NA	NA	NA	NA	1.00654	NA	NA
hsa-miR-221-3p	NA	NA	NA	NA	1.41257	0.0242546	-0.667818	0.0139476	NA	NA	NA	NA	NA	NA	NA	3.99503	3.15	3.62075
hsa-miR-221-5p	NA	NA	NA	NA	NA	NA	-0.886409	0.0191117	0.114907	NA	NA	NA	NA	NA	NA	1.73026	NA	NA
hsa-miR-222-3p	NA	NA	NA	NA	NA	NA	NA	NA	0.801505	NA	NA	NA	0.689271	NA	NA	3.20185	3.77	4.12699
hsa-miR-222-5p	NA	NA	NA	NA	NA	NA	-0.963724	0.0492285	0.300657	NA	NA	NA	NA	NA	NA	2.77496	NA	NA
hsa-miR-223-3p	NA	NA	NA	NA	NA	NA	1.03029	0.000367174	1.30746	1.02	NA	NA	1.5921	2.13	NA	NA	NA	NA
hsa-miR-223-5p	NA	NA	NA	NA	NA	NA	1.08554	0.000360632	0.24027	NA	NA	NA	0.218268	NA	NA	NA	NA	NA
hsa-miR-224-3p	4.05501	3.74297e-06	NA	NA	NA	NA	2.28216	1.01598e-10	0.52675	NA	NA	NA	NA	NA	NA	-0.17216	NA	NA
hsa-miR-224-5p	2.90795	1.2864e-07	2.46886	0.00283062	2.78968	2.41468e-06	2.91931	5.51933e-32	2.0367	3.21	2.28	1.7	0.593615	NA	NA	0.568106	NA	1.57113
hsa-miR-2277-3p	NA	NA	NA	NA	3.98945	0.00779555	1.62874	0.000281503	NA	NA	NA	NA	NA	NA	NA	NA	NA	NA
hsa-miR-2277-5p	NA	NA	NA	NA	NA	NA	2.03445	1.55501e-11	0.368731	NA	NA	NA	NA	NA	NA	NA	NA	NA
hsa-miR-2355-3p	NA	NA	NA	NA	NA	NA	1.15092	0.0193002	0.441402	NA	NA	NA	0.142439	NA	NA	NA	NA	NA
hsa-miR-2355-5p	NA	NA	NA	NA	NA	NA	1.78243	1.42531e-09	1.52569	NA	NA	NA	1.13327	NA	NA	0.708424	NA	NA
hsa-miR-2392	NA	NA	-3.0706	0.00546785	NA	NA	NA	NA	NA	NA	NA	NA	NA	NA	NA	NA	NA	NA
hsa-miR-23a-3p	NA	NA	NA	NA	NA	NA	0.569168	0.0231341	0.750595	NA	0.8	0.61	0.702238	NA	NA	-0.66958	NA	NA
hsa-miR-23a-5p	-2.10765	0.00812737	NA	NA	NA	NA	NA	NA	0.248421	NA	NA	NA	NA	NA	NA	NA	NA	NA
hsa-miR-23b-3p	NA	NA	NA	NA	NA	NA	-1.17537	8.54315e-07	-0.391929	NA	NA	NA	-0.28861	NA	NA	-0.970316	NA	NA
hsa-miR-23b-5p	NA	NA	NA	NA	NA	NA	NA	NA	-0.109602	NA	NA	NA	-0.097562	NA	NA	NA	NA	NA
hsa-miR-23c	NA	NA	NA	NA	NA	NA	NA	NA	0.255047	NA	NA	NA	0.170317	NA	NA	-0.128268	NA	NA
hsa-miR-24-1-5p	NA	NA	NA	NA	NA	NA	NA	NA	-1.02678	NA	NA	NA	-1.26895	NA	NA	-1.09228	NA	NA
hsa-miR-24-2-5p	NA	NA	NA	NA	NA	NA	1.14145	2.34749e-07	0.373052	NA	NA	NA	NA	NA	NA	-0.858067	NA	NA
hsa-miR-24-3p	NA	NA	NA	NA	NA	NA	NA	NA	0.215753	NA	0.47	NA	0.330236	0.8	NA	-0.346689	NA	NA
hsa-miR-25-3p	NA	NA	NA	NA	1.47028	0.0308896	1.04111	7.60603e-07	0.794795	1.47	0.78	0.81	0.913333	2.1	NA	NA	NA	NA
hsa-miR-25-5p	NA	NA	NA	NA	NA	NA	1.11487	1.08465e-05	NA	NA	NA	NA	NA	NA	NA	NA	NA	NA
hsa-miR-2681-3p	NA	NA	NA	NA	NA	NA	2.32405	0.0183249	NA	NA	NA	NA	NA	NA	NA	NA	NA	NA
hsa-miR-26a-1-3p	NA	NA	NA	NA	NA	NA	NA	NA	-0.66463	NA	NA	NA	NA	NA	NA	0.27694	NA	NA
hsa-miR-26a-5p	NA	NA	NA	NA	NA	NA	NA	NA	-0.41111	-0.53	NA	NA	-0.851289	NA	NA	NA	NA	NA
hsa-miR-26b-3p	NA	NA	NA	NA	NA	NA	NA	NA	0.353037	NA	NA	NA	NA	NA	NA	-0.675315	NA	NA
hsa-miR-26b-5p	NA	NA	NA	NA	NA	NA	NA	NA	-0.308342	NA	NA	NA	-0.808048	NA	NA	-0.963308	NA	NA
hsa-miR-27a-3p	NA	NA	NA	NA	1.92147	0.000376175	1.11886	1.29055e-07	0.47306	NA	0.9	NA	0.41007	NA	NA	-0.716109	NA	NA
hsa-miR-27a-5p	NA	NA	NA	NA	NA	NA	NA	NA	0.433301	NA	NA	NA	NA	NA	NA	-1.13407	NA	NA
hsa-miR-27b-3p	NA	NA	NA	NA	NA	NA	NA	NA	-1.13591	NA	NA	-0.85	-0.911838	NA	NA	-1.41284	NA	NA
hsa-miR-27b-5p	NA	NA	NA	NA	NA	NA	-0.614437	0.0378023	-0.553903	NA	NA	NA	NA	NA	NA	-0.858124	NA	NA
hsa-miR-28-3p	NA	NA	NA	NA	NA	NA	0.914556	3.14067e-06	0.788202	NA	NA	NA	0.94214	NA	NA	NA	NA	NA
hsa-miR-28-5p	NA	NA	NA	NA	NA	NA	0.665056	0.00166082	0.567626	0.6	NA	0.81	0.999542	1.14	NA	NA	NA	NA
hsa-miR-296-3p	NA	NA	NA	NA	NA	NA	NA	NA	NA	NA	NA	NA	0.183454	NA	NA	NA	NA	NA
hsa-miR-296-5p	NA	NA	NA	NA	NA	NA	NA	NA	0.351297	NA	NA	NA	0.43437	NA	NA	NA	NA	NA
hsa-miR-299-3p	NA	NA	NA	NA	NA	NA	-1.56256	0.000277441	NA	NA	NA	NA	NA	NA	NA	NA	NA	NA
hsa-miR-299-5p	NA	NA	NA	NA	NA	NA	NA	NA	NA	NA	NA	NA	-0.251716	NA	NA	NA	NA	NA
hsa-miR-29a-3p	NA	NA	NA	NA	NA	NA	NA	NA	-0.716328	NA	NA	NA	-0.757198	NA	NA	NA	NA	NA
hsa-miR-29a-5p	NA	NA	NA	NA	NA	NA	NA	NA	-0.186061	NA	NA	NA	0.417966	NA	NA	0.630227	NA	NA
hsa-miR-29b-1-5p	NA	NA	NA	NA	NA	NA	-0.922402	0.000914563	0.239912	NA	NA	NA	0.207827	NA	NA	0.526433	NA	NA
hsa-miR-29b-2-5p	NA	NA	NA	NA	NA	NA	NA	NA	-0.283562	NA	NA	NA	NA	NA	NA	-0.796788	NA	NA
hsa-miR-29b-3p	-1.36001	0.0166878	NA	NA	NA	NA	NA	NA	NA	NA	NA	NA	-0.364602	-1.23	NA	1.03389	NA	2.03961
hsa-miR-29c-3p	NA	NA	NA	NA	NA	NA	NA	NA	-0.393604	NA	NA	NA	-1.30989	NA	NA	-0.830933	NA	NA
hsa-miR-29c-5p	-1.55089	0.00702922	NA	NA	NA	NA	NA	NA	-0.389551	NA	NA	NA	-0.425013	NA	NA	NA	NA	NA
hsa-miR-301a-3p	NA	NA	NA	NA	NA	NA	NA	NA	0.558148	NA	0.54	NA	0.592827	NA	NA	-0.341668	NA	NA
hsa-miR-301a-5p	NA	NA	NA	NA	NA	NA	NA	NA	0.170919	NA	NA	NA	NA	NA	NA	-0.423855	NA	NA
hsa-miR-301b	NA	NA	NA	NA	NA	NA	1.20489	9.87206e-06	NA	NA	NA	NA	NA	NA	NA	NA	NA	NA
hsa-miR-301b-3p	NA	NA	NA	NA	NA	NA	NA	NA	NA	NA	NA	NA	0.114161	NA	NA	NA	NA	NA
hsa-miR-302b-3p	NA	NA	NA	NA	NA	NA	-1.92966	0.0424244	NA	NA	NA	NA	NA	NA	NA	NA	NA	NA
hsa-miR-3065-3p	NA	NA	NA	NA	NA	NA	1.64495	0.0342801	-1.70495	NA	NA	NA	-1.5561	NA	NA	-3.07771	NA	NA
hsa-miR-3065-5p	NA	NA	NA	NA	NA	NA	NA	NA	-0.616666	NA	NA	NA	-0.635506	NA	NA	NA	NA	NA
hsa-miR-3074-5p	NA	NA	NA	NA	NA	NA	NA	NA	NA	NA	NA	NA	0.523029	NA	NA	-0.349565	NA	NA
hsa-miR-30a-3p	-2.00077	5.84014e-06	NA	NA	NA	NA	-1.4788	4.71266e-11	-0.978768	NA	-1.28	NA	NA	NA	NA	-0.598491	NA	NA
hsa-miR-30a-5p	-1.74933	4.35373e-05	NA	NA	NA	NA	-1.32366	2.75832e-10	-0.34859	-0.99	-1.25	-1.25	NA	-0.58	NA	-0.962445	NA	NA
hsa-miR-30b-3p	-2.52209	2.54035e-05	NA	NA	NA	NA	-1.7878	3.62857e-12	-0.892162	NA	NA	NA	NA	NA	NA	1.92135	NA	NA
hsa-miR-30b-5p	-2.33544	1.27248e-07	NA	NA	NA	NA	-0.689606	0.00378075	-1.11896	-0.71	NA	NA	-1.03123	NA	NA	0.495125	NA	NA
hsa-miR-30c-1-3p	NA	NA	NA	NA	NA	NA	-0.950841	7.02268e-05	-0.435528	NA	NA	NA	-0.236433	NA	NA	0.405951	NA	NA
hsa-miR-30c-2-3p	-1.86571	0.000135792	-1.63174	0.0432389	NA	NA	-1.31069	2.00062e-08	-1.40659	NA	NA	NA	-0.518165	NA	NA	-0.617579	NA	NA
hsa-miR-30c-5p	-1.90051	1.34383e-05	NA	NA	NA	NA	-1.12676	4.70173e-08	-0.945532	-0.88	-1.21	-0.83	NA	NA	NA	-0.415155	NA	NA
hsa-miR-30d-3p	-1.2123	0.041173	NA	NA	NA	NA	-0.606844	0.0186259	NA	NA	NA	NA	NA	NA	NA	1.1579	NA	NA
hsa-miR-30d-5p	NA	NA	NA	NA	NA	NA	-0.833583	6.15621e-05	-0.191391	-0.94	-0.62	-0.35	0.611707	NA	NA	0.578574	NA	NA
hsa-miR-30e-3p	NA	NA	NA	NA	NA	NA	NA	NA	-0.416156	NA	-0.9	NA	NA	NA	NA	0.360965	NA	NA
hsa-miR-30e-5p	NA	NA	NA	NA	NA	NA	NA	NA	NA	NA	NA	-0.44	NA	NA	NA	1.00076	NA	NA
hsa-miR-31-3p	NA	NA	NA	NA	NA	NA	NA	NA	NA	NA	NA	NA	2.18486	NA	NA	NA	NA	NA
hsa-miR-31-5p	-2.00257	0.000833476	NA	NA	NA	NA	-1.97715	0.0107485	-0.783522	NA	NA	NA	1.71253	3.97	1.52	NA	NA	-2.38162
hsa-miR-3118	NA	NA	3.12925	0.0323507	NA	NA	2.94635	0.000505238	NA	NA	NA	NA	NA	NA	NA	NA	NA	NA
hsa-miR-3127-5p	NA	NA	NA	NA	NA	NA	NA	NA	0.339225	NA	NA	NA	0.602022	NA	NA	NA	NA	NA
hsa-miR-3130-5p	NA	NA	NA	NA	NA	NA	NA	NA	0.817879	NA	NA	NA	0.428792	NA	NA	NA	NA	NA
hsa-miR-3143	NA	NA	NA	NA	NA	NA	1.4296	0.030645	NA	NA	NA	NA	NA	NA	NA	NA	NA	NA
hsa-miR-3151-5p	NA	NA	3.54441	0.020814	NA	NA	NA	NA	NA	NA	NA	NA	NA	NA	NA	NA	NA	NA
hsa-miR-3152-5p	NA	NA	NA	NA	NA	NA	-1.77092	0.0107485	NA	NA	NA	NA	NA	NA	NA	NA	NA	NA
hsa-miR-3154	NA	NA	NA	NA	-4.68575	0.00323976	-3.49524	3.20774e-05	NA	NA	NA	NA	NA	NA	NA	NA	NA	NA
hsa-miR-3155b	NA	NA	NA	NA	NA	NA	1.76485	0.0285315	NA	NA	NA	NA	NA	NA	NA	NA	NA	NA
hsa-miR-3170	NA	NA	NA	NA	NA	NA	NA	NA	0.726651	NA	NA	NA	0.839343	NA	NA	NA	NA	NA
hsa-miR-3174	NA	NA	NA	NA	NA	NA	2.73242	2.71322e-07	NA	NA	NA	NA	NA	NA	NA	NA	NA	NA
hsa-miR-3176	NA	NA	NA	NA	NA	NA	1.34008	6.35746e-05	NA	NA	NA	NA	NA	NA	NA	NA	NA	NA
hsa-miR-3177-3p	NA	NA	NA	NA	NA	NA	1.44746	0.00830069	NA	NA	NA	NA	NA	NA	NA	NA	NA	NA
hsa-miR-3191-3p	NA	NA	NA	NA	NA	NA	NA	NA	NA	NA	NA	NA	NA	NA	NA	0.134948	NA	NA
hsa-miR-3194-5p	NA	NA	NA	NA	NA	NA	2.05725	2.17211e-06	NA	NA	NA	NA	NA	NA	NA	NA	NA	NA
hsa-miR-3199	NA	NA	NA	NA	NA	NA	NA	NA	NA	NA	NA	NA	-0.0707335	NA	NA	NA	NA	NA
hsa-miR-32-3p	-2.08443	0.00207752	NA	NA	NA	NA	-1.08708	0.00166082	-0.0836388	NA	NA	NA	NA	NA	NA	NA	NA	NA
hsa-miR-32-5p	NA	NA	NA	NA	NA	NA	0.600502	0.044307	0.508981	NA	NA	NA	NA	NA	NA	NA	NA	NA
hsa-miR-3200-3p	NA	NA	NA	NA	NA	NA	NA	NA	-0.435003	NA	NA	NA	0.259745	NA	NA	NA	NA	NA
hsa-miR-320a	NA	NA	NA	NA	NA	NA	NA	NA	0.287382	0.64	NA	NA	NA	NA	NA	NA	NA	NA
hsa-miR-320b	NA	NA	NA	NA	NA	NA	1.01662	2.9374e-05	0.275025	NA	NA	NA	-0.215755	NA	NA	-0.294943	NA	NA
hsa-miR-320c	NA	NA	NA	NA	NA	NA	1.09538	1.72188e-05	0.068206	NA	NA	NA	NA	NA	NA	NA	NA	NA
hsa-miR-320d	NA	NA	NA	NA	NA	NA	1.50455	1.88169e-06	0.12111	NA	NA	NA	NA	NA	NA	NA	NA	NA
hsa-miR-323a-3p	-3.19736	0.041747	NA	NA	NA	NA	-2.52822	2.9247e-05	-0.463428	NA	NA	NA	-0.5591	NA	NA	NA	NA	NA
hsa-miR-323b-3p	-3.17551	0.0329808	NA	NA	NA	NA	-2.84295	0.000288994	-0.649376	NA	NA	NA	-0.670421	NA	NA	NA	NA	NA
hsa-miR-324-3p	NA	NA	NA	NA	NA	NA	NA	NA	-0.419377	NA	NA	NA	0.997941	0.99	NA	0.288064	NA	NA
hsa-miR-324-5p	NA	NA	NA	NA	NA	NA	-1.11343	0.000132974	-0.661793	-0.73	NA	NA	0.435923	NA	NA	-0.368762	NA	NA
hsa-miR-326	NA	NA	NA	NA	NA	NA	NA	NA	NA	NA	NA	NA	NA	NA	NA	-0.511301	NA	NA
hsa-miR-328-3p	NA	NA	NA	NA	-1.56766	0.0164062	NA	NA	-0.193157	NA	NA	NA	0.778306	NA	0.68	0.411075	NA	NA
hsa-miR-329-3p	NA	NA	NA	NA	NA	NA	-2.04962	0.000302994	NA	NA	NA	NA	NA	NA	NA	NA	NA	NA
hsa-miR-330-3p	NA	NA	NA	NA	NA	NA	1.17574	2.37664e-07	0.223285	1.32	NA	NA	NA	1.17	NA	NA	NA	NA
hsa-miR-330-5p	NA	NA	NA	NA	NA	NA	1.15273	4.82324e-07	1.12428	NA	NA	NA	0.686515	NA	NA	0.583422	NA	NA
hsa-miR-331-3p	NA	NA	NA	NA	NA	NA	NA	NA	0.71634	-0.7	NA	0.81	0.773921	NA	NA	0.621361	NA	NA
hsa-miR-331-5p	NA	NA	NA	NA	NA	NA	NA	NA	0.0969013	NA	NA	NA	0.1695	NA	NA	0.214131	NA	NA
hsa-miR-335-3p	-1.55818	0.0113042	NA	NA	NA	NA	-1.24541	0.0414087	-1.2812	NA	NA	NA	NA	NA	NA	-1.72772	NA	NA
hsa-miR-335-5p	-1.95891	0.000158511	NA	NA	NA	NA	-1.88214	2.61261e-06	-1.11683	-2.92	NA	NA	NA	-2.54	NA	-1.14289	-5.63	-4.08548
hsa-miR-337-3p	NA	NA	NA	NA	NA	NA	-1.89703	8.40165e-06	-0.78083	NA	NA	NA	-0.825775	NA	NA	-0.987637	NA	NA
hsa-miR-337-5p	NA	NA	NA	NA	NA	NA	-1.763	0.00380662	NA	NA	NA	NA	NA	NA	NA	NA	NA	NA
hsa-miR-338-3p	NA	NA	NA	NA	NA	NA	NA	NA	0.773398	NA	NA	NA	-1.194	NA	0.62	-0.818426	NA	NA
hsa-miR-338-5p	NA	NA	NA	NA	NA	NA	NA	NA	0.307318	NA	NA	NA	-0.669352	NA	NA	-0.449087	NA	NA
hsa-miR-339-3p	NA	NA	NA	NA	NA	NA	0.680765	0.00447753	0.118548	NA	NA	NA	0.509553	NA	NA	NA	NA	NA
hsa-miR-339-5p	NA	NA	NA	NA	NA	NA	0.606543	0.0432402	NA	NA	0.88	0.79	0.812699	1.41	NA	NA	NA	NA
hsa-miR-33a-3p	NA	NA	NA	NA	NA	NA	NA	NA	-0.135508	NA	NA	NA	-0.171443	NA	NA	0.213344	NA	NA
hsa-miR-33a-5p	NA	NA	NA	NA	NA	NA	NA	NA	-0.70479	NA	NA	NA	-2.20025	NA	NA	NA	NA	NA
hsa-miR-33b-5p	NA	NA	NA	NA	2.82936	0.00611021	2.31874	2.99407e-14	0.355884	NA	NA	NA	-0.156828	NA	NA	0.257977	NA	NA
hsa-miR-340-3p	NA	NA	NA	NA	NA	NA	0.952287	2.51082e-05	0.578847	NA	NA	NA	0.644621	NA	NA	0.273338	NA	NA
hsa-miR-340-5p	NA	NA	NA	NA	NA	NA	0.732967	0.00203094	0.563265	NA	NA	NA	1.33265	NA	NA	0.579661	NA	NA
hsa-miR-342-3p	NA	NA	NA	NA	NA	NA	1.48153	4.14402e-11	1.44488	1.17	0.97	0.68	0.845449	0.94	NA	0.525531	NA	NA
hsa-miR-342-5p	NA	NA	NA	NA	NA	NA	1.69731	1.65639e-10	0.786295	NA	NA	NA	0.604181	NA	NA	0.277451	NA	NA
hsa-miR-345-5p	NA	NA	NA	NA	NA	NA	NA	NA	-0.69912	NA	NA	NA	NA	NA	NA	NA	NA	NA
hsa-miR-346	NA	NA	NA	NA	NA	NA	NA	NA	NA	NA	NA	NA	NA	NA	2.12	NA	NA	NA
hsa-miR-34a-3p	3.4911	0.00531348	2.12567	0.0179117	2.6356	1.7998e-06	2.23274	2.88096e-06	0.0857517	NA	NA	NA	0.200678	NA	NA	NA	NA	NA
hsa-miR-34a-5p	NA	NA	1.97817	0.0166676	2.8398	3.66522e-08	1.09372	0.000288994	0.944651	1.84	1.89	1.37	1.58559	3.66	NA	NA	NA	2.2154
hsa-miR-34b-3p	NA	NA	NA	NA	NA	NA	NA	NA	NA	NA	2.11	NA	NA	NA	NA	NA	NA	NA
hsa-miR-34b-5p	3.67915	0.00162681	2.24683	0.0318905	NA	NA	NA	NA	NA	NA	NA	NA	NA	NA	NA	NA	NA	NA
hsa-miR-34c-3p	NA	NA	NA	NA	3.77219	0.0149392	NA	NA	NA	NA	NA	NA	0.366104	NA	NA	0.38623	NA	NA
hsa-miR-34c-5p	3.31951	2.56573e-06	NA	NA	NA	NA	NA	NA	NA	NA	NA	NA	0.585989	NA	NA	NA	NA	NA
hsa-miR-3605-3p	NA	NA	NA	NA	NA	NA	0.562962	0.0475589	NA	NA	NA	NA	NA	NA	NA	-0.240746	NA	NA
hsa-miR-3607-3p	NA	NA	NA	NA	NA	NA	NA	NA	NA	NA	NA	NA	NA	NA	NA	0.988443	NA	NA
hsa-miR-361-3p	NA	NA	NA	NA	NA	NA	1.07023	3.17704e-07	0.732999	NA	NA	NA	0.70043	NA	NA	0.572822	NA	NA
hsa-miR-361-5p	NA	NA	NA	NA	NA	NA	NA	NA	-0.409105	0.55	NA	0.32	0.244636	NA	NA	0.547147	NA	NA
hsa-miR-3613-3p	NA	NA	NA	NA	NA	NA	NA	NA	0.0946309	NA	NA	NA	NA	NA	NA	NA	NA	NA
hsa-miR-3613-5p	NA	NA	1.88965	0.019749	NA	NA	NA	NA	1.35984	NA	NA	NA	0.54334	NA	NA	0.355618	NA	NA
hsa-miR-3614-3p	NA	NA	NA	NA	NA	NA	NA	NA	NA	NA	NA	NA	0.102568	NA	NA	NA	NA	NA
hsa-miR-3614-5p	NA	NA	2.45327	0.038481	NA	NA	1.20151	0.0111783	NA	NA	NA	NA	0.182718	NA	NA	NA	NA	NA
hsa-miR-3615	NA	NA	NA	NA	NA	NA	0.744094	0.00233855	0.42629	NA	NA	NA	0.499391	NA	NA	NA	NA	NA
hsa-miR-3616-3p	NA	NA	NA	NA	NA	NA	-2.33486	0.0119166	NA	NA	NA	NA	NA	NA	NA	NA	NA	NA
hsa-miR-362-3p	NA	NA	-1.79967	0.0283456	NA	NA	NA	NA	-0.288784	NA	NA	NA	-0.465134	NA	NA	NA	NA	NA
hsa-miR-362-5p	-2.43206	3.02303e-06	-2.07641	0.0103948	-1.62269	0.0118694	-2.44891	6.84887e-20	-2.61725	-1.45	-1.48	-0.69	-1.41173	-1.06	-1.27	NA	NA	0.962054
hsa-miR-363-3p	-2.40105	2.68703e-07	-2.79143	6.58527e-05	-1.85223	0.00265529	-1.74185	1.29749e-08	-1.32757	-2.19	-1.99	-0.76	-0.756398	-2.98	NA	-1.0584	NA	-2.95589
hsa-miR-363-5p	NA	NA	NA	NA	NA	NA	-2.25614	6.82008e-05	NA	NA	NA	NA	NA	NA	NA	NA	NA	NA
hsa-miR-365-3p	NA	NA	NA	NA	NA	NA	NA	NA	NA	NA	NA	NA	NA	2.31	NA	NA	NA	NA
hsa-miR-3651	NA	NA	NA	NA	NA	NA	NA	NA	NA	NA	NA	NA	NA	NA	NA	0.102683	NA	NA
hsa-miR-3653-3p	NA	NA	NA	NA	NA	NA	NA	NA	0.445288	NA	NA	NA	NA	NA	NA	0.699256	NA	NA
hsa-miR-3653-5p	NA	NA	NA	NA	NA	NA	NA	NA	NA	NA	NA	NA	NA	NA	NA	0.357848	NA	NA
hsa-miR-365a-3p	NA	NA	NA	NA	NA	NA	NA	NA	0.991484	1.45	NA	NA	0.979094	NA	NA	0.475089	NA	3.58256
hsa-miR-365a-5p	NA	NA	NA	NA	NA	NA	-1.50974	0.00339046	NA	NA	NA	NA	NA	NA	NA	0.158342	NA	NA
hsa-miR-365b-3p	NA	NA	NA	NA	NA	NA	NA	NA	0.991484	NA	NA	NA	0.979094	NA	NA	0.475089	NA	NA
hsa-miR-365b-5p	NA	NA	NA	NA	NA	NA	1.40612	0.000213398	NA	NA	NA	NA	NA	NA	NA	NA	NA	NA
hsa-miR-3677-3p	NA	NA	NA	NA	NA	NA	1.04578	0.0493104	0.511768	NA	NA	NA	0.333161	NA	NA	0.2773	NA	NA
hsa-miR-3677-5p	NA	NA	NA	NA	NA	NA	NA	NA	NA	NA	NA	NA	0.352248	NA	NA	0.233378	NA	NA
hsa-miR-3678-5p	NA	NA	NA	NA	NA	NA	1.52398	0.0448948	NA	NA	NA	NA	NA	NA	NA	NA	NA	NA
hsa-miR-3681-3p	NA	NA	NA	NA	NA	NA	-2.12689	0.0249063	NA	NA	NA	NA	NA	NA	NA	NA	NA	NA
hsa-miR-3681-5p	NA	NA	NA	NA	NA	NA	2.19599	0.0107315	NA	NA	NA	NA	NA	NA	NA	NA	NA	NA
hsa-miR-3682-3p	NA	NA	NA	NA	NA	NA	NA	NA	NA	NA	NA	NA	0.102844	NA	NA	NA	NA	NA
hsa-miR-3684	NA	NA	NA	NA	NA	NA	NA	NA	NA	NA	NA	NA	NA	NA	NA	0.0748528	NA	NA
hsa-miR-369-3p	-2.58243	0.00129754	NA	NA	NA	NA	-1.81316	0.0251864	NA	NA	NA	NA	-0.553869	NA	NA	-0.438915	NA	NA
hsa-miR-369-5p	-2.21332	0.00612497	NA	NA	NA	NA	-1.39765	0.00644614	-0.339144	NA	NA	NA	-0.55672	NA	NA	NA	NA	NA
hsa-miR-3690	NA	NA	NA	NA	NA	NA	NA	NA	NA	NA	NA	NA	0.177615	NA	NA	0.071739	NA	NA
hsa-miR-370-3p	NA	NA	NA	NA	NA	NA	-1.80507	0.00028007	-0.205018	NA	NA	NA	-0.38689	NA	NA	-0.334624	NA	NA
hsa-miR-370-5p	NA	NA	NA	NA	NA	NA	NA	NA	-0.135622	NA	NA	NA	-0.225696	NA	NA	-0.282624	NA	NA
hsa-miR-374a-3p	NA	NA	NA	NA	NA	NA	NA	NA	1.13678	NA	NA	NA	0.689845	NA	NA	0.321985	NA	NA
hsa-miR-374a-5p	NA	NA	NA	NA	NA	NA	NA	NA	0.625938	NA	NA	NA	0.76673	NA	NA	0.276263	NA	NA
hsa-miR-374b-3p	NA	NA	NA	NA	NA	NA	NA	NA	0.299186	NA	NA	NA	0.276981	NA	NA	NA	NA	NA
hsa-miR-374b-5p	NA	NA	NA	NA	NA	NA	NA	NA	0.747065	NA	NA	0.35	NA	NA	NA	0.317523	NA	NA
hsa-miR-375	-2.4477	3.14307e-05	NA	NA	NA	NA	-2.43872	5.13352e-05	-1.38721	NA	NA	NA	-0.788708	NA	NA	NA	NA	NA
hsa-miR-376a-2-5p	NA	NA	NA	NA	NA	NA	-1.66492	0.0209384	NA	NA	NA	NA	NA	NA	NA	NA	NA	NA
hsa-miR-376a-3p	-3.04552	0.0352143	NA	NA	NA	NA	-2.06053	3.04665e-05	NA	NA	NA	NA	NA	NA	NA	NA	NA	NA
hsa-miR-376a-5p	NA	NA	NA	NA	NA	NA	-1.10181	0.0246679	NA	NA	NA	NA	NA	NA	NA	NA	NA	NA
hsa-miR-376b-3p	NA	NA	NA	NA	NA	NA	-1.78549	0.000472857	NA	NA	NA	NA	NA	NA	NA	NA	NA	NA
hsa-miR-376c-3p	-2.59741	0.000324292	NA	NA	NA	NA	-2.23161	2.23887e-05	-0.461744	NA	NA	NA	-0.853568	NA	NA	-0.811442	NA	NA
hsa-miR-377-3p	-2.81489	0.0225898	NA	NA	NA	NA	-1.20885	0.00378333	NA	NA	NA	NA	NA	NA	NA	NA	NA	NA
hsa-miR-377-5p	-4.10398	0.0352143	NA	NA	NA	NA	-1.8461	4.96777e-05	NA	NA	NA	NA	NA	NA	NA	NA	NA	NA
hsa-miR-378a-3p	-1.66784	0.000365159	NA	NA	NA	NA	NA	NA	NA	-0.65	NA	-0.7	NA	NA	-1.68	NA	NA	NA
hsa-miR-378a-5p	-1.58411	0.00888065	-1.75677	0.0489323	NA	NA	NA	NA	-0.501194	NA	NA	NA	-0.86926	NA	NA	NA	NA	NA
hsa-miR-378c	-1.84616	0.00247644	NA	NA	NA	NA	NA	NA	0.733184	NA	NA	NA	NA	NA	NA	NA	NA	NA
hsa-miR-378d	-1.91849	0.00342593	NA	NA	NA	NA	NA	NA	0.0851072	NA	NA	NA	-0.151048	NA	NA	NA	NA	NA
hsa-miR-379-3p	NA	NA	NA	NA	NA	NA	-1.52081	0.0052955	NA	NA	NA	NA	NA	NA	NA	NA	NA	NA
hsa-miR-379-5p	-2.62115	0.000540264	NA	NA	NA	NA	-1.91088	2.39014e-05	-0.620467	NA	NA	NA	-1.87934	NA	NA	-2.07455	NA	NA
hsa-miR-381-3p	-1.79799	0.000776275	NA	NA	NA	NA	-1.73735	0.000114357	-0.311866	NA	NA	NA	-0.888069	NA	0.67	-1.30101	NA	NA
hsa-miR-382-5p	-2.39813	0.0486319	NA	NA	NA	NA	-1.92859	0.00112967	NA	NA	NA	-1.02	-0.475699	-1.37	NA	-0.693883	NA	NA
hsa-miR-3909	NA	NA	NA	NA	NA	NA	NA	NA	NA	NA	NA	NA	NA	NA	NA	0.144573	NA	NA
hsa-miR-3910	NA	NA	2.55089	0.0462601	NA	NA	NA	NA	NA	NA	NA	NA	NA	NA	NA	NA	NA	NA
hsa-miR-3912-3p	NA	NA	NA	NA	NA	NA	1.2046	6.40292e-07	0.154454	NA	NA	NA	NA	NA	NA	0.30645	NA	NA
hsa-miR-3913-5p	NA	NA	NA	NA	NA	NA	NA	NA	NA	NA	NA	NA	0.185603	NA	NA	NA	NA	NA
hsa-miR-3922-3p	NA	NA	NA	NA	NA	NA	NA	NA	NA	NA	NA	NA	0.16574	NA	NA	NA	NA	NA
hsa-miR-3927-5p	NA	NA	NA	NA	NA	NA	-2.23714	0.0111023	NA	NA	NA	NA	NA	NA	NA	NA	NA	NA
hsa-miR-3928-3p	NA	NA	NA	NA	NA	NA	0.837617	0.011498	0.23466	NA	NA	NA	NA	NA	NA	-0.204748	NA	NA
hsa-miR-3934-3p	NA	NA	NA	NA	NA	NA	NA	NA	NA	NA	NA	NA	0.602131	NA	NA	NA	NA	NA
hsa-miR-3934-5p	NA	NA	NA	NA	NA	NA	NA	NA	NA	NA	NA	NA	0.207812	NA	NA	NA	NA	NA
hsa-miR-3939	NA	NA	NA	NA	NA	NA	1.64276	0.0228146	NA	NA	NA	NA	NA	NA	NA	NA	NA	NA
hsa-miR-3941	NA	NA	NA	NA	NA	NA	2.13829	0.0279164	NA	NA	NA	NA	NA	NA	NA	NA	NA	NA
hsa-miR-3942-5p	NA	NA	NA	NA	NA	NA	NA	NA	NA	NA	NA	NA	0.0645352	NA	NA	NA	NA	NA
hsa-miR-409-3p	NA	NA	NA	NA	NA	NA	NA	NA	NA	NA	NA	NA	NA	-0.83	NA	-0.358813	NA	NA
hsa-miR-409-5p	NA	NA	NA	NA	NA	NA	-1.97998	0.0198681	-0.48139	NA	NA	NA	-1.14407	NA	NA	-0.833907	NA	NA
hsa-miR-410-3p	NA	NA	NA	NA	NA	NA	-1.32792	0.0454204	NA	NA	NA	NA	-0.752865	NA	NA	-0.629011	NA	NA
hsa-miR-411-3p	NA	NA	NA	NA	3.513	0.0358705	NA	NA	NA	NA	NA	NA	NA	NA	NA	NA	NA	NA
hsa-miR-411-5p	-2.0719	2.65123e-05	NA	NA	NA	NA	-1.77888	9.24792e-05	-0.399102	NA	NA	NA	-0.606732	NA	NA	-0.39575	NA	NA
hsa-miR-412-5p	NA	NA	NA	NA	NA	NA	NA	NA	NA	NA	NA	NA	-0.282717	NA	NA	NA	NA	NA
hsa-miR-421	NA	NA	NA	NA	NA	NA	NA	NA	NA	NA	NA	-0.7	0.318171	NA	NA	NA	NA	NA
hsa-miR-422a	NA	NA	NA	NA	NA	NA	NA	NA	NA	-1.99	NA	-0.82	NA	NA	NA	NA	NA	NA
hsa-miR-422b	NA	NA	NA	NA	NA	NA	NA	NA	NA	-1.17	NA	NA	NA	NA	NA	NA	NA	NA
hsa-miR-423-3p	NA	NA	NA	NA	NA	NA	NA	NA	NA	0.64	NA	0.46	1.10577	1.99	NA	-0.219572	1.51	1.66348
hsa-miR-423-5p	NA	NA	NA	NA	NA	NA	NA	NA	NA	NA	NA	NA	1.12195	NA	NA	0.356931	NA	NA
hsa-miR-424-3p	NA	NA	NA	NA	NA	NA	NA	NA	NA	NA	NA	NA	-0.658813	NA	NA	NA	NA	NA
hsa-miR-424-5p	NA	NA	NA	NA	NA	NA	NA	NA	-0.317585	NA	NA	NA	-2.18722	-5.02	NA	NA	NA	-3.07644
hsa-miR-425-3p	NA	NA	NA	NA	NA	NA	NA	NA	NA	NA	NA	NA	0.758626	NA	NA	0.289748	NA	NA
hsa-miR-425-5p	NA	NA	NA	NA	NA	NA	NA	NA	0.359046	NA	NA	NA	1.01128	1.22	NA	1.16489	NA	1.22051
hsa-miR-429	-2.19018	3.74297e-06	NA	NA	-1.5446	0.0200348	-1.7307	4.39902e-14	-2.08662	-2.64	-2.23	-0.58	-0.639394	NA	NA	-1.00913	NA	NA
hsa-miR-431-3p	NA	NA	NA	NA	NA	NA	-1.77515	0.000927259	-0.13846	NA	NA	NA	-0.336688	NA	NA	NA	NA	NA
hsa-miR-432-5p	-2.13547	0.00357082	NA	NA	NA	NA	-1.98955	0.00369467	NA	NA	NA	NA	-0.32646	-1.92	NA	NA	NA	NA
hsa-miR-4326	NA	NA	NA	NA	NA	NA	0.921189	0.00564669	0.258017	NA	NA	NA	0.701122	NA	NA	0.285443	NA	NA
hsa-miR-433-3p	NA	NA	NA	NA	NA	NA	-1.75418	5.48441e-05	NA	NA	NA	NA	NA	NA	NA	NA	NA	NA
hsa-miR-4422	NA	NA	4.14103	0.00223301	3.71906	0.040162	NA	NA	NA	NA	NA	NA	NA	NA	NA	NA	NA	NA
hsa-miR-4423-5p	NA	NA	NA	NA	NA	NA	NA	NA	NA	NA	NA	NA	0.178377	NA	NA	NA	NA	NA
hsa-miR-4435	NA	NA	NA	NA	NA	NA	2.27643	0.000131166	NA	NA	NA	NA	NA	NA	NA	NA	NA	NA
hsa-miR-4444	NA	NA	NA	NA	NA	NA	NA	NA	0.0488216	NA	NA	NA	NA	NA	NA	NA	NA	NA
hsa-miR-4445-3p	NA	NA	-4.06028	0.00342175	NA	NA	NA	NA	NA	NA	NA	NA	NA	NA	NA	NA	NA	NA
hsa-miR-4445-5p	NA	NA	-4.65099	0.000249189	NA	NA	-2.32548	0.0117082	NA	NA	NA	NA	NA	NA	NA	NA	NA	NA
hsa-miR-4461	NA	NA	NA	NA	NA	NA	-3.35831	5.20624e-07	NA	NA	NA	NA	NA	NA	NA	0.209993	NA	NA
hsa-miR-4473	NA	NA	NA	NA	NA	NA	NA	NA	0.1168	NA	NA	NA	0.103781	NA	NA	NA	NA	NA
hsa-miR-4484	NA	NA	NA	NA	NA	NA	NA	NA	NA	NA	NA	NA	NA	NA	NA	0.818529	NA	NA
hsa-miR-4492	NA	NA	NA	NA	NA	NA	2.93814	8.22248e-06	NA	NA	NA	NA	NA	NA	NA	NA	NA	NA
hsa-miR-449a	4.24975	0.0140457	NA	NA	NA	NA	NA	NA	NA	NA	NA	NA	NA	NA	NA	NA	NA	NA
hsa-miR-4501	NA	NA	NA	NA	NA	NA	NA	NA	NA	NA	NA	NA	NA	NA	NA	1.33199	NA	NA
hsa-miR-4508	4.18801	0.0340629	NA	NA	NA	NA	NA	NA	NA	NA	NA	NA	NA	NA	NA	NA	NA	NA
hsa-miR-450a-5p	NA	NA	NA	NA	NA	NA	NA	NA	NA	NA	NA	NA	-0.599918	NA	NA	-0.350349	NA	NA
hsa-miR-450b-5p	NA	NA	NA	NA	NA	NA	NA	NA	0.426656	NA	NA	NA	NA	NA	NA	-0.513264	NA	NA
hsa-miR-4510	-2.45788	0.00876265	NA	NA	NA	NA	-1.09427	0.000152952	NA	NA	NA	NA	NA	NA	NA	NA	NA	NA
hsa-miR-4517	NA	NA	2.69672	0.0426697	NA	NA	1.50111	0.0103217	NA	NA	NA	NA	NA	NA	NA	NA	NA	NA
hsa-miR-451a	NA	NA	NA	NA	NA	NA	NA	NA	0.990543	NA	NA	NA	NA	NA	NA	0.674436	NA	NA
hsa-miR-452-3p	2.45773	0.00101506	NA	NA	NA	NA	1.98596	1.21857e-13	0.835924	NA	1.44	NA	NA	NA	NA	NA	NA	NA
hsa-miR-452-5p	2.14923	0.000113249	NA	NA	2.049	0.00211704	1.59983	2.86049e-11	1.55297	1.74	0.8	NA	NA	NA	NA	NA	NA	NA
hsa-miR-4536-3p	NA	NA	NA	NA	NA	NA	NA	NA	NA	NA	NA	NA	NA	NA	NA	0.0743522	NA	NA
hsa-miR-454-3p	NA	NA	NA	NA	NA	NA	NA	NA	0.414265	NA	NA	NA	0.577984	NA	NA	NA	NA	NA
hsa-miR-455-3p	1.5219	0.00488653	NA	NA	NA	NA	NA	NA	0.323637	NA	NA	NA	NA	NA	NA	-3.2381	NA	NA
hsa-miR-455-5p	NA	NA	NA	NA	NA	NA	0.717728	0.00656716	0.757255	NA	NA	0.74	0.651848	NA	NA	-2.88023	NA	NA
hsa-miR-4634	3.87469	3.49241e-07	NA	NA	NA	NA	1.67713	0.00237789	NA	NA	NA	NA	NA	NA	NA	NA	NA	NA
hsa-miR-4636	NA	NA	NA	NA	NA	NA	NA	NA	0.0561917	NA	NA	NA	0.289383	NA	NA	NA	NA	NA
hsa-miR-4638-3p	NA	NA	NA	NA	NA	NA	NA	NA	0.187129	NA	NA	NA	NA	NA	NA	NA	NA	NA
hsa-miR-4645-3p	NA	NA	NA	NA	NA	NA	1.23957	7.54324e-05	NA	NA	NA	NA	NA	NA	NA	NA	NA	NA
hsa-miR-4652-3p	NA	NA	NA	NA	NA	NA	2.41342	0.0168897	NA	NA	NA	NA	NA	NA	NA	NA	NA	NA
hsa-miR-4652-5p	NA	NA	NA	NA	NA	NA	2.85919	0.00204018	NA	NA	NA	NA	NA	NA	NA	NA	NA	NA
hsa-miR-4660	NA	NA	NA	NA	NA	NA	NA	NA	NA	NA	NA	NA	0.147822	NA	NA	NA	NA	NA
hsa-miR-4661-5p	NA	NA	NA	NA	NA	NA	NA	NA	0.389437	NA	NA	NA	0.490366	NA	NA	0.879705	NA	NA
hsa-miR-4662a-5p	NA	NA	NA	NA	NA	NA	NA	NA	-0.932736	NA	NA	NA	-1.47194	NA	NA	1.68201	NA	NA
hsa-miR-4668-3p	NA	NA	NA	NA	NA	NA	NA	NA	0.478989	NA	NA	NA	0.766737	NA	NA	NA	NA	NA
hsa-miR-4671-3p	NA	NA	NA	NA	NA	NA	1.76363	0.00232538	NA	NA	NA	NA	NA	NA	NA	NA	NA	NA
hsa-miR-4676-5p	NA	NA	NA	NA	NA	NA	NA	NA	NA	NA	NA	NA	0.117825	NA	NA	0.0771732	NA	NA
hsa-miR-4677-3p	NA	NA	NA	NA	NA	NA	1.04545	5.62916e-05	0.985109	NA	NA	NA	1.0331	NA	NA	NA	NA	NA
hsa-miR-4677-5p	NA	NA	NA	NA	NA	NA	2.27654	7.49705e-05	NA	NA	NA	NA	NA	NA	NA	NA	NA	NA
hsa-miR-4695-3p	NA	NA	NA	NA	NA	NA	-1.84343	0.0377001	NA	NA	NA	NA	NA	NA	NA	NA	NA	NA
hsa-miR-4695-5p	NA	NA	-2.5183	0.0323507	NA	NA	NA	NA	NA	NA	NA	NA	NA	NA	NA	NA	NA	NA
hsa-miR-4697-3p	NA	NA	NA	NA	NA	NA	2.68261	0.00467016	NA	NA	NA	NA	NA	NA	NA	NA	NA	NA
hsa-miR-4700-5p	NA	NA	2.9506	0.038481	NA	NA	NA	NA	NA	NA	NA	NA	NA	NA	NA	NA	NA	NA
hsa-miR-4705	NA	NA	NA	NA	NA	NA	1.81677	0.0342801	NA	NA	NA	NA	NA	NA	NA	NA	NA	NA
hsa-miR-4709-3p	NA	NA	NA	NA	NA	NA	-1.65254	0.000614613	0.138789	NA	NA	NA	0.215002	NA	NA	0.411406	NA	NA
hsa-miR-4724-5p	NA	NA	NA	NA	NA	NA	NA	NA	NA	NA	NA	NA	0.0900493	NA	NA	NA	NA	NA
hsa-miR-4728-3p	NA	NA	NA	NA	NA	NA	NA	NA	-0.0662242	NA	NA	NA	NA	NA	NA	NA	NA	NA
hsa-miR-4728-5p	NA	NA	NA	NA	NA	NA	-3.3456	0.000149988	NA	NA	NA	NA	NA	NA	NA	NA	NA	NA
hsa-miR-4732-3p	NA	NA	NA	NA	NA	NA	NA	NA	NA	NA	NA	NA	NA	NA	NA	0.54848	NA	NA
hsa-miR-4746-5p	NA	NA	NA	NA	NA	NA	1.73819	7.07525e-06	0.239045	NA	NA	NA	0.403366	NA	NA	0.237507	NA	NA
hsa-miR-4758-3p	NA	NA	NA	NA	NA	NA	1.66255	0.0123236	NA	NA	NA	NA	NA	NA	NA	NA	NA	NA
hsa-miR-4767	NA	NA	NA	NA	NA	NA	1.43158	0.00012464	NA	NA	NA	NA	NA	NA	NA	NA	NA	NA
hsa-miR-4768-5p	NA	NA	NA	NA	NA	NA	NA	NA	NA	NA	NA	NA	0.182962	NA	NA	NA	NA	NA
hsa-miR-4772-3p	NA	NA	NA	NA	NA	NA	1.64268	0.00849019	0.794226	NA	NA	NA	0.599746	NA	NA	0.300749	NA	NA
hsa-miR-4772-5p	NA	NA	NA	NA	NA	NA	2.315	4.80302e-06	0.0906408	NA	NA	NA	0.120364	NA	NA	NA	NA	NA
hsa-miR-4773	NA	NA	NA	NA	NA	NA	4.95196	2.4623e-19	NA	NA	NA	NA	NA	NA	NA	NA	NA	NA
hsa-miR-4787-3p	NA	NA	NA	NA	NA	NA	NA	NA	NA	NA	NA	NA	0.15172	NA	NA	NA	NA	NA
hsa-miR-4796-5p	NA	NA	NA	NA	NA	NA	NA	NA	NA	NA	NA	NA	0.123616	NA	NA	NA	NA	NA
hsa-miR-4802-3p	NA	NA	NA	NA	NA	NA	-1.28852	0.000878931	NA	NA	NA	NA	NA	NA	NA	NA	NA	NA
hsa-miR-483-3p	NA	NA	-2.9221	0.0264934	NA	NA	-2.77765	0.0032162	NA	NA	NA	NA	NA	NA	NA	-0.835912	NA	NA
hsa-miR-483-5p	NA	NA	NA	NA	-2.94043	0.0108301	-4.32498	2.48157e-07	NA	NA	NA	NA	NA	NA	NA	NA	NA	NA
hsa-miR-484	NA	NA	NA	NA	NA	NA	0.73939	0.0015831	0.319318	0.81	0.7	NA	0.534029	NA	NA	NA	NA	NA
hsa-miR-485-3p	-2.3787	0.0341095	NA	NA	NA	NA	-2.19718	0.000109263	-0.48947	NA	NA	NA	-0.595422	NA	NA	-0.303461	NA	NA
hsa-miR-485-5p	NA	NA	NA	NA	NA	NA	-1.98994	1.8452e-05	NA	NA	NA	NA	NA	NA	NA	NA	NA	NA
hsa-miR-486-3p	NA	NA	NA	NA	NA	NA	NA	NA	0.234364	NA	NA	NA	0.27991	NA	NA	0.116603	NA	NA
hsa-miR-486-5p	NA	NA	NA	NA	NA	NA	NA	NA	0.733917	NA	NA	1.39	NA	NA	NA	1.20163	NA	NA
hsa-miR-487a-3p	NA	NA	NA	NA	NA	NA	-1.81187	0.0342801	NA	NA	NA	NA	NA	NA	NA	NA	NA	NA
hsa-miR-487b-3p	-2.3081	0.00162681	NA	NA	NA	NA	-1.75721	0.00523388	-0.170332	NA	NA	NA	-0.392323	NA	NA	-0.353455	NA	NA
hsa-miR-488-3p	NA	NA	NA	NA	NA	NA	-2.25938	0.000632838	NA	NA	NA	NA	NA	NA	NA	NA	NA	NA
hsa-miR-489-3p	NA	NA	NA	NA	NA	NA	NA	NA	NA	NA	NA	NA	NA	-2.14	NA	NA	NA	NA
hsa-miR-491-3p	NA	NA	NA	NA	NA	NA	2.24792	0.0241166	NA	NA	NA	NA	NA	NA	NA	0.173702	NA	NA
hsa-miR-491-5p	NA	NA	NA	NA	NA	NA	NA	NA	NA	NA	NA	NA	0.228809	NA	NA	NA	NA	NA
hsa-miR-493-3p	NA	NA	NA	NA	NA	NA	-1.78561	0.000213398	-0.191012	NA	NA	NA	-0.37551	NA	NA	-0.544155	NA	NA
hsa-miR-493-5p	-2.20117	0.000442376	NA	NA	NA	NA	-2.0501	0.00963193	-0.640444	NA	NA	NA	-0.477926	NA	NA	-0.537327	NA	NA
hsa-miR-494-3p	NA	NA	NA	NA	NA	NA	-1.85112	0.0042903	NA	-0.79	NA	NA	NA	-1.43	NA	NA	NA	NA
hsa-miR-495-3p	NA	NA	NA	NA	NA	NA	-2.41057	2.37664e-07	-0.243997	NA	NA	NA	-0.456022	-0.88	NA	-0.491481	NA	NA
hsa-miR-497-3p	NA	NA	NA	NA	NA	NA	NA	NA	0.189608	NA	NA	NA	NA	NA	NA	NA	NA	NA
hsa-miR-497-5p	NA	NA	NA	NA	1.38642	0.0444759	0.861668	0.000882706	0.256581	NA	NA	0.45	-1.0885	-2.15	NA	-1.23981	-2.26	NA
hsa-miR-498	NA	NA	NA	NA	NA	NA	NA	NA	NA	NA	NA	NA	NA	2.63	1.05	NA	NA	NA
hsa-miR-4999-5p	NA	NA	NA	NA	NA	NA	NA	NA	NA	NA	NA	NA	0.167512	NA	NA	0.357793	NA	NA
hsa-miR-5000-3p	NA	NA	NA	NA	NA	NA	1.14599	0.00236057	0.47155	NA	NA	NA	0.166246	NA	NA	NA	NA	NA
hsa-miR-5001-5p	NA	NA	NA	NA	NA	NA	1.81815	0.0149516	NA	NA	NA	NA	0.0348175	NA	NA	NA	NA	NA
hsa-miR-5002-5p	NA	NA	NA	NA	NA	NA	1.8417	0.0434103	NA	NA	NA	NA	NA	NA	NA	NA	NA	NA
hsa-miR-500a-3p	-1.48086	0.00295782	-2.21853	0.00287015	NA	NA	-1.89276	5.28356e-17	-1.38864	NA	NA	NA	-0.601796	NA	NA	-0.667088	NA	NA
hsa-miR-500a-5p	NA	NA	-2.36946	0.00612818	NA	NA	-1.80817	7.90027e-09	-0.868674	-1.47	-1.15	-1.2	-0.515464	NA	-2.26	NA	NA	NA
hsa-miR-500b-3p	NA	NA	NA	NA	NA	NA	NA	NA	-0.227019	NA	NA	NA	NA	NA	NA	NA	NA	NA
hsa-miR-500b-5p	-2.94496	0.00112376	-2.09117	0.0204333	NA	NA	-1.62264	1.41605e-05	-0.868674	NA	NA	NA	-0.515464	NA	NA	NA	NA	NA
hsa-miR-501-3p	NA	NA	-1.77411	0.028676	-2.01309	0.0008267	-1.44722	4.47203e-10	-1.44752	NA	NA	NA	-0.860009	NA	NA	-0.613191	NA	NA
hsa-miR-501-5p	-1.93813	0.014709	-1.95086	0.0327604	-1.61777	0.0251047	-2.32488	4.26494e-14	-0.523087	-0.84	NA	-1.41	-0.27398	-0.85	-1.04	NA	NA	NA
hsa-miR-5010-3p	NA	NA	NA	NA	NA	NA	NA	NA	NA	NA	NA	NA	0.336761	NA	NA	-0.138707	NA	NA
hsa-miR-5010-5p	NA	NA	NA	NA	NA	NA	0.969359	0.0329503	NA	NA	NA	NA	NA	NA	NA	NA	NA	NA
hsa-miR-502-3p	NA	NA	-1.87787	0.0177682	-1.61219	0.00611021	-1.38903	2.70225e-08	-0.615395	NA	NA	NA	-0.345879	NA	NA	0.500647	NA	NA
hsa-miR-502-5p	NA	NA	-1.9562	0.0323507	NA	NA	-1.70174	1.64532e-07	-0.131699	NA	-1.19	-0.71	-0.229303	NA	-1.64	NA	NA	1.82152
hsa-miR-503-3p	NA	NA	NA	NA	NA	NA	NA	NA	0.517602	NA	NA	NA	-0.13828	NA	NA	NA	NA	NA
hsa-miR-503-5p	NA	NA	NA	NA	2.10176	0.0129554	NA	NA	NA	NA	1.1	NA	-0.530369	-2	NA	NA	NA	NA
hsa-miR-505-3p	NA	NA	NA	NA	NA	NA	NA	NA	0.214187	NA	NA	NA	0.334608	1.52	NA	-0.443666	NA	NA
hsa-miR-505-5p	NA	NA	NA	NA	NA	NA	NA	NA	NA	NA	NA	NA	NA	NA	NA	-0.543715	NA	NA
hsa-miR-506-3p	-4.58169	0.00812737	-5.04761	4.76808e-07	NA	NA	-5.30658	2.29341e-11	NA	NA	-1.12	NA	NA	NA	NA	NA	NA	NA
hsa-miR-506-5p	NA	NA	NA	NA	NA	NA	-3.74395	3.37297e-05	NA	NA	NA	NA	NA	NA	NA	NA	NA	NA
hsa-miR-507	NA	NA	-4.09071	0.00704277	NA	NA	-4.47499	1.02572e-07	NA	NA	-1.14	NA	NA	NA	NA	NA	NA	NA
hsa-miR-508-3p	-6.91969	3.89775e-17	-4.46561	6.95295e-07	-2.73043	0.0129554	-5.86067	1.59579e-11	-3.24328	NA	NA	-0.4	-2.69418	NA	NA	-1.17952	NA	NA
hsa-miR-508-5p	-3.22129	0.00199602	-3.95443	2.14997e-05	NA	NA	-4.8371	6.28573e-19	NA	NA	NA	NA	NA	NA	NA	-0.426671	NA	NA
hsa-miR-509-3-5p	-3.81814	3.47057e-05	-3.86446	3.14783e-05	-2.66608	0.0497314	-5.9108	2.52561e-08	NA	NA	NA	NA	NA	NA	NA	NA	NA	NA
hsa-miR-509-3p	-8.36722	6.78411e-18	-3.19086	0.000449244	NA	NA	-5.30019	7.88781e-10	-0.967778	NA	NA	NA	-0.809571	NA	NA	NA	NA	NA
hsa-miR-509-5p	-5.10471	0.000840129	-4.11429	4.33738e-06	NA	NA	-5.58375	3.67762e-23	NA	NA	NA	NA	NA	NA	NA	NA	NA	NA
hsa-miR-510-3p	NA	NA	-4.21473	0.000248138	NA	NA	-4.65202	8.47481e-10	NA	NA	NA	NA	NA	NA	NA	NA	NA	NA
hsa-miR-510-5p	-4.45509	0.0139837	-3.51745	0.000193946	-2.91163	0.0275649	-6.36896	1.64469e-18	NA	NA	-2.24	NA	NA	NA	NA	NA	NA	NA
hsa-miR-513a-3p	NA	NA	-3.37724	0.00343253	NA	NA	NA	NA	NA	NA	NA	NA	NA	NA	NA	NA	NA	NA
hsa-miR-513a-5p	-2.74695	0.00691855	-3.30963	0.000431077	NA	NA	-5.09227	4.04187e-15	NA	NA	NA	NA	NA	NA	NA	NA	NA	NA
hsa-miR-513b-5p	NA	NA	NA	NA	NA	NA	-5.58632	2.25418e-15	NA	NA	NA	NA	NA	NA	NA	NA	NA	NA
hsa-miR-513c-3p	NA	NA	NA	NA	NA	NA	-3.63258	7.87854e-05	NA	NA	NA	NA	NA	NA	NA	NA	NA	NA
hsa-miR-513c-5p	NA	NA	-2.83244	0.00263851	NA	NA	-4.44009	4.70546e-05	NA	NA	NA	NA	NA	NA	NA	NA	NA	NA
hsa-miR-514a-3p	-5.89677	2.22301e-17	-4.67652	1.82743e-07	-3.17585	0.000280807	-5.58117	4.1329e-09	-2.551	NA	-3.26	NA	-1.83316	NA	NA	-1.08075	NA	NA
hsa-miR-514a-5p	-5.35218	0.000158129	-4.86218	3.9316e-07	-3.24853	0.00154901	-5.35663	3.45e-24	NA	NA	NA	NA	NA	NA	NA	NA	NA	NA
hsa-miR-514b-3p	NA	NA	-4.93622	4.76273e-05	NA	NA	-5.00964	9.31093e-13	NA	NA	NA	NA	NA	NA	NA	NA	NA	NA
hsa-miR-514b-5p	NA	NA	-4.28759	5.93529e-06	NA	NA	-2.52663	0.00326518	NA	NA	NA	NA	NA	NA	NA	NA	NA	NA
hsa-miR-519e-5p	NA	NA	NA	NA	NA	NA	NA	NA	NA	NA	0.95	NA	NA	NA	NA	NA	NA	NA
hsa-miR-532-3p	-1.36746	0.0249032	-2.65549	0.00025486	-2.30028	1.52863e-05	-1.67276	1.5561e-10	-1.99961	NA	NA	NA	-1.16195	NA	NA	NA	NA	NA
hsa-miR-532-5p	-1.42914	0.00412877	NA	NA	-1.54737	0.0118694	-1.08187	9.17464e-06	-1.26633	NA	-1.62	-1.37	-0.475242	NA	-2.23	NA	NA	NA
hsa-miR-539-3p	-2.05525	0.0117353	NA	NA	NA	NA	-1.8427	0.00806749	NA	NA	NA	NA	NA	NA	NA	NA	NA	NA
hsa-miR-539-5p	NA	NA	NA	NA	NA	NA	-2.38861	0.000632838	-0.553245	NA	NA	NA	-0.646725	NA	NA	-0.475861	NA	NA
hsa-miR-542-3p	NA	NA	NA	NA	NA	NA	NA	NA	0.240018	NA	NA	NA	-0.97115	NA	NA	-0.913172	NA	NA
hsa-miR-542-5p	NA	NA	NA	NA	NA	NA	NA	NA	NA	NA	NA	NA	-0.509653	NA	NA	-0.433852	NA	NA
hsa-miR-543	NA	NA	NA	NA	NA	NA	-1.3578	0.00130501	NA	NA	NA	NA	NA	NA	NA	NA	NA	NA
hsa-miR-545-3p	NA	NA	NA	NA	NA	NA	NA	NA	NA	NA	0.7	NA	NA	NA	NA	NA	NA	NA
hsa-miR-545-5p	NA	NA	NA	NA	NA	NA	NA	NA	0.0621608	NA	NA	NA	NA	NA	NA	NA	NA	NA
hsa-miR-548ah-5p	NA	NA	NA	NA	NA	NA	-2.7653	1.20881e-07	NA	NA	NA	NA	NA	NA	NA	NA	NA	NA
hsa-miR-548al	NA	NA	NA	NA	NA	NA	0.841367	0.0111758	NA	NA	NA	NA	NA	NA	NA	NA	NA	NA
hsa-miR-548an	NA	NA	NA	NA	NA	NA	2.51739	0.00589863	NA	NA	NA	NA	NA	NA	NA	NA	NA	NA
hsa-miR-548b-3p	NA	NA	NA	NA	NA	NA	NA	NA	NA	NA	NA	NA	-0.271588	NA	NA	NA	NA	NA
hsa-miR-548ba	-3.22691	0.0173498	-2.33313	0.0283456	NA	NA	-1.91341	6.23026e-07	NA	NA	NA	NA	NA	NA	NA	NA	NA	NA
hsa-miR-548d-3p	NA	NA	NA	NA	NA	NA	2.3885	0.0108446	NA	NA	NA	NA	NA	NA	NA	NA	NA	NA
hsa-miR-548e-3p	NA	NA	NA	NA	NA	NA	0.797625	0.00222155	NA	NA	NA	NA	NA	NA	NA	NA	NA	NA
hsa-miR-548e-5p	NA	NA	NA	NA	NA	NA	0.710079	0.0349921	NA	NA	NA	NA	NA	NA	NA	NA	NA	NA
hsa-miR-548j-5p	NA	NA	NA	NA	NA	NA	NA	NA	NA	NA	NA	NA	NA	NA	NA	0.156093	NA	NA
hsa-miR-548o-3p	NA	NA	NA	NA	NA	NA	NA	NA	NA	NA	NA	NA	0.0945683	NA	NA	NA	NA	NA
hsa-miR-548p	NA	NA	NA	NA	NA	NA	-2.10804	0.0255635	NA	NA	NA	NA	NA	NA	NA	NA	NA	NA
hsa-miR-548v	NA	NA	NA	NA	NA	NA	NA	NA	NA	NA	NA	NA	NA	NA	NA	0.154256	NA	NA
hsa-miR-550-5p	NA	NA	NA	NA	NA	NA	NA	NA	NA	NA	1.23	NA	NA	NA	NA	NA	NA	NA
hsa-miR-550a-3-5p	NA	NA	NA	NA	NA	NA	NA	NA	0.0672192	NA	NA	NA	NA	NA	NA	0.105891	NA	NA
hsa-miR-550a-3p	NA	NA	NA	NA	NA	NA	1.28732	0.000510057	0.204275	NA	NA	NA	0.206225	NA	NA	0.121999	NA	NA
hsa-miR-550a-5p	NA	NA	NA	NA	NA	NA	NA	NA	0.226633	NA	NA	NA	0.181003	NA	NA	0.342695	NA	NA
hsa-miR-551b-3p	NA	NA	NA	NA	NA	NA	-1.13894	0.0454024	-0.328175	NA	NA	NA	1.10318	NA	NA	NA	NA	NA
hsa-miR-551b-5p	NA	NA	NA	NA	NA	NA	-2.00414	0.0339718	NA	NA	NA	NA	NA	NA	NA	NA	NA	NA
hsa-miR-5586-5p	NA	NA	NA	NA	NA	NA	1.50219	0.00714348	0.700484	NA	NA	NA	0.799283	NA	NA	NA	NA	NA
hsa-miR-5588-3p	NA	NA	NA	NA	NA	NA	1.1813	0.00345259	0.188304	NA	NA	NA	NA	NA	NA	NA	NA	NA
hsa-miR-5588-5p	NA	NA	NA	NA	NA	NA	0.968696	0.00830069	NA	NA	NA	NA	NA	NA	NA	NA	NA	NA
hsa-miR-561-5p	NA	NA	NA	NA	NA	NA	-1.15292	0.00133773	NA	NA	NA	NA	1.05956	NA	NA	1.07866	NA	NA
hsa-miR-5682	NA	NA	4.38626	0.014183	NA	NA	NA	NA	NA	NA	NA	NA	NA	NA	NA	NA	NA	NA
hsa-miR-5683	NA	NA	NA	NA	NA	NA	NA	NA	0.268563	NA	NA	NA	NA	NA	NA	0.2708	NA	NA
hsa-miR-5699-5p	NA	NA	NA	NA	NA	NA	NA	NA	NA	NA	NA	NA	0.1393	NA	NA	NA	NA	NA
hsa-miR-570-3p	NA	NA	NA	NA	NA	NA	1.66278	0.00739662	NA	NA	NA	NA	NA	NA	NA	0.236757	NA	NA
hsa-miR-5706	NA	NA	NA	NA	NA	NA	NA	NA	0.0772981	NA	NA	NA	NA	NA	NA	0.0928771	NA	NA
hsa-miR-5708	NA	NA	NA	NA	NA	NA	-2.27928	0.0149512	NA	NA	NA	NA	NA	NA	NA	NA	NA	NA
hsa-miR-574-3p	NA	NA	NA	NA	NA	NA	NA	NA	NA	NA	NA	0.89	NA	NA	NA	NA	NA	NA
hsa-miR-576-5p	NA	NA	NA	NA	NA	NA	0.778843	0.00164475	0.803137	NA	NA	NA	0.636587	NA	NA	0.810591	NA	NA
hsa-miR-577	NA	NA	NA	NA	-1.97175	0.0147356	NA	NA	-0.694048	NA	NA	NA	-0.823479	NA	NA	1.18602	NA	NA
hsa-miR-580-3p	NA	NA	NA	NA	NA	NA	0.992913	0.0269202	NA	NA	NA	NA	0.0600256	NA	NA	NA	NA	NA
hsa-miR-581	NA	NA	NA	NA	NA	NA	NA	NA	NA	NA	NA	NA	NA	NA	NA	0.182023	NA	NA
hsa-miR-582-3p	NA	NA	NA	NA	NA	NA	NA	NA	NA	NA	NA	NA	-0.79371	NA	NA	2.71862	NA	NA
hsa-miR-582-5p	NA	NA	NA	NA	NA	NA	NA	NA	NA	NA	NA	NA	NA	NA	NA	1.84299	NA	NA
hsa-miR-584-5p	1.86033	0.00933534	NA	NA	NA	NA	1.47878	1.14933e-05	2.1685	NA	NA	NA	1.90583	NA	NA	1.30929	NA	NA
hsa-miR-585-3p	NA	NA	NA	NA	NA	NA	NA	NA	-0.204967	NA	NA	NA	NA	NA	NA	NA	NA	NA
hsa-miR-589-3p	NA	NA	NA	NA	NA	NA	NA	NA	NA	NA	NA	NA	0.439208	NA	NA	0.453512	NA	NA
hsa-miR-589-5p	NA	NA	NA	NA	NA	NA	NA	NA	0.933004	NA	NA	NA	1.3746	NA	NA	0.905804	NA	NA
hsa-miR-590-3p	NA	NA	1.8618	0.0199345	NA	NA	0.668759	0.044956	0.826221	NA	NA	NA	0.526067	NA	NA	0.376099	NA	NA
hsa-miR-590-5p	NA	NA	NA	NA	1.71877	0.00611021	NA	NA	1.03572	NA	0.58	NA	0.672555	NA	NA	0.74272	NA	NA
hsa-miR-592	2.835	4.75701e-05	NA	NA	NA	NA	4.05547	3.4144e-14	2.06231	NA	2.48	NA	2.14555	NA	NA	NA	NA	NA
hsa-miR-595	NA	NA	NA	NA	NA	NA	NA	NA	NA	NA	NA	0.61	NA	NA	NA	NA	NA	NA
hsa-miR-598-3p	NA	NA	NA	NA	NA	NA	-0.794265	0.00810364	NA	NA	NA	NA	NA	NA	NA	1.29246	NA	NA
hsa-miR-599	5.09577	0.00060499	NA	NA	NA	NA	NA	NA	NA	NA	NA	NA	NA	NA	NA	NA	NA	NA
hsa-miR-601	NA	NA	NA	NA	NA	NA	NA	NA	NA	NA	NA	0.38	NA	NA	NA	NA	NA	NA
hsa-miR-602	NA	NA	NA	NA	NA	NA	NA	NA	NA	NA	NA	NA	NA	NA	2.06	NA	NA	NA
hsa-miR-615-3p	NA	NA	NA	NA	NA	NA	NA	NA	-0.427495	NA	NA	NA	NA	NA	NA	-1.09775	NA	NA
hsa-miR-616-3p	NA	NA	NA	NA	NA	NA	NA	NA	0.199446	NA	NA	NA	0.260306	NA	NA	0.516783	NA	NA
hsa-miR-616-5p	NA	NA	NA	NA	NA	NA	NA	NA	0.584917	NA	NA	NA	0.536124	NA	NA	0.980444	NA	NA
hsa-miR-618	NA	NA	NA	NA	NA	NA	0.923048	0.00564669	0.249396	NA	NA	NA	0.267275	NA	NA	1.26125	NA	NA
hsa-miR-624-5p	NA	NA	NA	NA	NA	NA	1.2342	0.00564669	0.140278	NA	NA	NA	0.272508	NA	NA	NA	NA	NA
hsa-miR-625-3p	NA	NA	NA	NA	NA	NA	NA	NA	0.995903	NA	NA	NA	2.05239	NA	NA	NA	NA	NA
hsa-miR-625-5p	NA	NA	NA	NA	NA	NA	NA	NA	0.124686	NA	NA	NA	0.604882	NA	NA	NA	NA	NA
hsa-miR-627-3p	NA	NA	NA	NA	NA	NA	1.19616	0.0156669	NA	NA	NA	NA	NA	NA	NA	NA	NA	NA
hsa-miR-627-5p	NA	NA	NA	NA	NA	NA	NA	NA	-0.10988	NA	NA	NA	NA	NA	NA	NA	NA	NA
hsa-miR-628-3p	NA	NA	NA	NA	NA	NA	NA	NA	NA	NA	NA	NA	-0.369779	NA	NA	-0.260227	NA	NA
hsa-miR-628-5p	NA	NA	NA	NA	NA	NA	NA	NA	NA	NA	NA	NA	0.747122	NA	NA	NA	NA	NA
hsa-miR-629-3p	NA	NA	NA	NA	NA	NA	NA	NA	0.943582	NA	NA	NA	0.195875	NA	NA	1.17436	NA	NA
hsa-miR-629-5p	NA	NA	NA	NA	NA	NA	NA	NA	1.60212	NA	1.01	0.79	1.08831	NA	NA	0.685683	NA	NA
hsa-miR-642a-5p	NA	NA	NA	NA	NA	NA	NA	NA	NA	NA	NA	0.24	0.696655	NA	NA	NA	NA	NA
hsa-miR-643	NA	NA	NA	NA	NA	NA	NA	NA	NA	NA	NA	NA	0.0434398	NA	NA	NA	NA	NA
hsa-miR-6503-3p	4.38902	0.00819956	2.0002	0.0147999	2.49686	0.0303339	1.71697	4.954e-07	NA	NA	NA	NA	NA	NA	NA	NA	NA	NA
hsa-miR-6503-5p	NA	NA	NA	NA	NA	NA	1.84738	3.13494e-07	NA	NA	NA	NA	NA	NA	NA	NA	NA	NA
hsa-miR-6507-5p	NA	NA	-3.12696	0.00754036	NA	NA	-2.35785	0.0292243	NA	NA	NA	NA	NA	NA	NA	NA	NA	NA
hsa-miR-6509-5p	NA	NA	NA	NA	NA	NA	NA	NA	0.425164	NA	NA	NA	0.625539	NA	NA	NA	NA	NA
hsa-miR-651-5p	NA	NA	NA	NA	NA	NA	NA	NA	0.386287	NA	NA	NA	0.809289	NA	NA	2.05374	NA	NA
hsa-miR-6511b-3p	NA	NA	NA	NA	NA	NA	NA	NA	NA	NA	NA	NA	0.117399	NA	NA	NA	NA	NA
hsa-miR-6512-5p	NA	NA	-3.39444	0.00283062	NA	NA	-3.77087	6.87741e-06	NA	NA	NA	NA	NA	NA	NA	NA	NA	NA
hsa-miR-652-3p	NA	NA	NA	NA	NA	NA	NA	NA	0.17549	NA	NA	-0.5	0.615947	NA	NA	NA	NA	NA
hsa-miR-652-5p	NA	NA	NA	NA	NA	NA	NA	NA	NA	NA	NA	NA	NA	NA	NA	0.0938568	NA	NA
hsa-miR-653-3p	NA	NA	NA	NA	NA	NA	NA	NA	0.347118	NA	NA	NA	-0.197042	NA	NA	NA	NA	NA
hsa-miR-653-5p	NA	NA	NA	NA	NA	NA	NA	NA	0.468439	NA	NA	NA	-0.853443	NA	1.02	NA	NA	NA
hsa-miR-654-3p	-1.82636	0.000533073	NA	NA	NA	NA	-1.84231	0.00114153	-0.299596	NA	NA	NA	-0.991705	NA	NA	-1.04403	NA	NA
hsa-miR-654-5p	NA	NA	NA	NA	NA	NA	-1.59089	0.00619429	NA	NA	NA	NA	NA	NA	NA	NA	NA	NA
hsa-miR-655-3p	NA	NA	NA	NA	NA	NA	-2.01876	0.00523388	NA	NA	NA	NA	NA	NA	NA	NA	NA	NA
hsa-miR-656-3p	NA	NA	NA	NA	NA	NA	-1.72433	0.000111965	NA	NA	NA	NA	NA	NA	NA	NA	NA	NA
hsa-miR-659-5p	NA	NA	NA	NA	NA	NA	NA	NA	0.0921751	NA	NA	NA	0.181285	NA	NA	0.330546	NA	NA
hsa-miR-660-3p	-4.30275	0.0129398	-1.83838	0.038481	NA	NA	-1.66371	1.44449e-05	NA	NA	NA	NA	-0.340276	NA	NA	NA	NA	NA
hsa-miR-660-5p	-2.05443	1.09061e-05	-2.1157	0.00621277	NA	NA	-1.61309	3.08728e-12	-1.55212	NA	-1.56	-2.07	-0.74503	NA	NA	NA	NA	NA
hsa-miR-664-3p	NA	NA	NA	NA	NA	NA	NA	NA	NA	NA	NA	-0.43	NA	NA	NA	NA	NA	NA
hsa-miR-664a-3p	NA	NA	NA	NA	NA	NA	-1.10735	3.69021e-05	-0.240423	NA	NA	NA	0.912718	NA	NA	0.846085	NA	NA
hsa-miR-664a-5p	NA	NA	NA	NA	NA	NA	-1.09128	3.16607e-05	-0.256418	NA	NA	NA	NA	NA	NA	NA	NA	NA
hsa-miR-664b-3p	NA	NA	NA	NA	NA	NA	NA	NA	0.286425	NA	NA	NA	0.830401	NA	NA	0.764924	NA	NA
hsa-miR-664b-5p	NA	NA	NA	NA	NA	NA	-0.999555	0.0452793	NA	NA	NA	NA	NA	NA	NA	0.181207	NA	NA
hsa-miR-668-3p	NA	NA	NA	NA	NA	NA	-2.10416	0.000985234	NA	NA	NA	NA	NA	NA	NA	NA	NA	NA
hsa-miR-671-3p	NA	NA	NA	NA	NA	NA	NA	NA	NA	NA	NA	NA	0.530445	NA	NA	0.817075	NA	NA
hsa-miR-671-5p	NA	NA	NA	NA	NA	NA	NA	NA	0.330344	NA	NA	NA	0.985252	NA	NA	0.591074	NA	NA
hsa-miR-6715a-3p	NA	NA	NA	NA	NA	NA	NA	NA	NA	NA	NA	NA	NA	NA	NA	1.07234	NA	NA
hsa-miR-6718-5p	NA	NA	NA	NA	NA	NA	NA	NA	0.303248	NA	NA	NA	0.625464	NA	NA	NA	NA	NA
hsa-miR-6723-5p	-2.24594	0.00182245	NA	NA	-2.6881	0.000483306	-2.61674	6.38788e-07	NA	NA	NA	NA	NA	NA	NA	0.153388	NA	NA
hsa-miR-6731-3p	NA	NA	NA	NA	NA	NA	1.98539	0.0260146	NA	NA	NA	NA	NA	NA	NA	NA	NA	NA
hsa-miR-6733-3p	NA	NA	NA	NA	NA	NA	NA	NA	NA	NA	NA	NA	0.0468325	NA	NA	NA	NA	NA
hsa-miR-6737-3p	NA	NA	NA	NA	NA	NA	1.44405	1.57739e-05	NA	NA	NA	NA	NA	NA	NA	NA	NA	NA
hsa-miR-675-3p	NA	NA	NA	NA	NA	NA	-2.04274	0.0119166	-1.99655	NA	NA	NA	-1.9718	NA	NA	-3.19348	NA	NA
hsa-miR-675-5p	NA	NA	NA	NA	NA	NA	-2.72017	5.48441e-05	NA	NA	NA	NA	NA	NA	NA	NA	NA	NA
hsa-miR-6752-3p	NA	NA	NA	NA	NA	NA	-2.15154	0.0242843	NA	NA	NA	NA	NA	NA	NA	NA	NA	NA
hsa-miR-6756-3p	NA	NA	NA	NA	NA	NA	1.92686	0.00177605	NA	NA	NA	NA	NA	NA	NA	NA	NA	NA
hsa-miR-676-3p	NA	NA	NA	NA	NA	NA	NA	NA	0.0955911	NA	NA	NA	NA	NA	NA	0.33824	NA	NA
hsa-miR-676-5p	NA	NA	NA	NA	NA	NA	NA	NA	NA	NA	NA	NA	NA	NA	NA	0.0938292	NA	NA
hsa-miR-6761-5p	NA	NA	NA	NA	NA	NA	NA	NA	0.10363	NA	NA	NA	NA	NA	NA	NA	NA	NA
hsa-miR-6762-3p	-4.03853	0.0352143	NA	NA	NA	NA	-1.5617	3.3008e-05	NA	NA	NA	NA	NA	NA	NA	NA	NA	NA
hsa-miR-6765-3p	NA	NA	NA	NA	NA	NA	1.51517	0.0339718	NA	NA	NA	NA	NA	NA	NA	NA	NA	NA
hsa-miR-6769b-3p	NA	NA	NA	NA	NA	NA	1.283	0.00849394	NA	NA	NA	NA	NA	NA	NA	NA	NA	NA
hsa-miR-6772-3p	NA	NA	NA	NA	NA	NA	-1.25061	0.000763879	NA	NA	NA	NA	NA	NA	NA	NA	NA	NA
hsa-miR-6774-3p	NA	NA	NA	NA	NA	NA	2.26624	0.00032511	NA	NA	NA	NA	NA	NA	NA	NA	NA	NA
hsa-miR-6787-3p	NA	NA	NA	NA	NA	NA	3.49096	1.80194e-13	NA	NA	NA	NA	NA	NA	NA	NA	NA	NA
hsa-miR-6802-3p	NA	NA	NA	NA	NA	NA	NA	NA	NA	NA	NA	NA	0.0410389	NA	NA	NA	NA	NA
hsa-miR-6803-3p	NA	NA	NA	NA	NA	NA	NA	NA	NA	NA	NA	NA	NA	NA	NA	0.0633522	NA	NA
hsa-miR-6806-3p	NA	NA	NA	NA	NA	NA	NA	NA	NA	NA	NA	NA	NA	NA	NA	0.170916	NA	NA
hsa-miR-6810-3p	NA	NA	NA	NA	NA	NA	-1.88018	0.00192907	NA	NA	NA	NA	NA	NA	NA	NA	NA	NA
hsa-miR-6813-5p	NA	NA	NA	NA	NA	NA	3.32919	2.61728e-05	NA	NA	NA	NA	NA	NA	NA	NA	NA	NA
hsa-miR-6815-3p	NA	NA	NA	NA	NA	NA	NA	NA	NA	NA	NA	NA	NA	NA	NA	-0.186463	NA	NA
hsa-miR-6837-3p	NA	NA	NA	NA	NA	NA	NA	NA	NA	NA	NA	NA	0.103869	NA	NA	NA	NA	NA
hsa-miR-6842-3p	NA	NA	NA	NA	NA	NA	NA	NA	NA	NA	NA	NA	NA	NA	NA	0.614198	NA	NA
hsa-miR-6843-3p	NA	NA	NA	NA	NA	NA	NA	NA	NA	NA	NA	NA	0.162115	NA	NA	NA	NA	NA
hsa-miR-6854-5p	NA	NA	NA	NA	NA	NA	NA	NA	NA	NA	NA	NA	0.158699	NA	NA	NA	NA	NA
hsa-miR-6862-3p	NA	NA	NA	NA	-4.0591	0.0203423	NA	NA	NA	NA	NA	NA	NA	NA	NA	NA	NA	NA
hsa-miR-6863	NA	NA	-4.7128	7.9299e-06	NA	NA	-2.82644	0.0024305	NA	NA	NA	NA	NA	NA	NA	NA	NA	NA
hsa-miR-6872-3p	NA	NA	NA	NA	NA	NA	-2.32184	0.01387	NA	NA	NA	NA	NA	NA	NA	NA	NA	NA
hsa-miR-6892-5p	NA	NA	NA	NA	NA	NA	NA	NA	0.330541	NA	NA	NA	0.580498	NA	NA	-0.110999	NA	NA
hsa-miR-7-1-3p	NA	NA	NA	NA	NA	NA	0.63885	0.0452793	0.544357	NA	NA	NA	0.658005	NA	NA	0.525385	NA	NA
hsa-miR-7-5p	NA	NA	2.10714	0.00507086	NA	NA	NA	NA	NA	NA	NA	NA	NA	NA	NA	NA	NA	NA
hsa-miR-708-3p	NA	NA	NA	NA	NA	NA	NA	NA	0.745517	NA	NA	NA	NA	NA	NA	-0.57486	NA	NA
hsa-miR-708-5p	NA	NA	NA	NA	NA	NA	NA	NA	0.738791	NA	NA	NA	NA	NA	NA	-0.454164	NA	NA
hsa-miR-7151-5p	NA	NA	NA	NA	NA	NA	2.18946	0.0249063	NA	NA	NA	NA	NA	NA	NA	NA	NA	NA
hsa-miR-744-3p	NA	NA	NA	NA	NA	NA	NA	NA	NA	NA	NA	NA	0.767186	NA	NA	NA	NA	NA
hsa-miR-744-5p	NA	NA	NA	NA	NA	NA	NA	NA	-0.467963	NA	NA	0.46	1.01325	NA	NA	-0.363324	NA	NA
hsa-miR-758-3p	NA	NA	NA	NA	NA	NA	-1.31569	0.0328021	-0.314881	NA	NA	NA	-0.542854	NA	NA	-0.676282	NA	NA
hsa-miR-758-5p	NA	NA	NA	NA	NA	NA	NA	NA	-0.237311	NA	NA	NA	-0.645987	NA	NA	-0.407822	NA	NA
hsa-miR-760	NA	NA	NA	NA	NA	NA	NA	NA	0.1448	NA	NA	NA	0.132472	NA	NA	NA	NA	NA
hsa-miR-7641	NA	NA	NA	NA	NA	NA	1.09764	0.0335605	NA	NA	NA	NA	NA	NA	NA	NA	NA	NA
hsa-miR-766-3p	NA	NA	NA	NA	NA	NA	NA	NA	-0.364914	NA	NA	NA	NA	NA	NA	1.25232	NA	NA
hsa-miR-769-3p	NA	NA	NA	NA	NA	NA	NA	NA	NA	NA	NA	NA	0.20497	NA	NA	NA	NA	NA
hsa-miR-769-5p	NA	NA	NA	NA	NA	NA	NA	NA	0.468779	NA	NA	NA	0.747426	NA	NA	0.383144	NA	NA
hsa-miR-770-5p	NA	NA	NA	NA	NA	NA	-2.95123	0.000163137	NA	NA	NA	NA	NA	NA	NA	NA	NA	NA
hsa-miR-7702	NA	NA	NA	NA	NA	NA	2.32135	0.00685773	NA	NA	NA	NA	NA	NA	NA	NA	NA	NA
hsa-miR-7704	NA	NA	NA	NA	NA	NA	0.873966	0.00300018	NA	NA	NA	NA	NA	NA	NA	NA	NA	NA
hsa-miR-7705	NA	NA	NA	NA	NA	NA	1.25899	4.83811e-05	NA	NA	NA	NA	NA	NA	NA	NA	NA	NA
hsa-miR-7706	NA	NA	NA	NA	NA	NA	NA	NA	0.141743	NA	NA	NA	0.362666	NA	NA	NA	NA	NA
hsa-miR-7846-3p	NA	NA	NA	NA	NA	NA	1.62651	0.00486194	NA	NA	NA	NA	NA	NA	NA	NA	NA	NA
hsa-miR-7974	NA	NA	NA	NA	NA	NA	1.17467	0.00668038	NA	NA	NA	NA	NA	NA	NA	NA	NA	NA
hsa-miR-7977	NA	NA	NA	NA	NA	NA	0.99194	0.0339718	NA	NA	NA	NA	NA	NA	NA	NA	NA	NA
hsa-miR-7978	NA	NA	NA	NA	NA	NA	1.93509	0.000254542	NA	NA	NA	NA	NA	NA	NA	NA	NA	NA
hsa-miR-8072	NA	NA	NA	NA	NA	NA	1.27423	0.0172022	NA	NA	NA	NA	NA	NA	NA	NA	NA	NA
hsa-miR-873-3p	-5.00019	0.00143152	-2.52614	0.0283456	NA	NA	-2.76379	1.93356e-10	NA	NA	NA	NA	NA	NA	NA	NA	NA	NA
hsa-miR-873-5p	-3.73125	0.00137492	-2.56272	0.00485111	NA	NA	-2.27704	7.4012e-08	NA	NA	NA	NA	NA	NA	NA	NA	NA	NA
hsa-miR-874-3p	-1.30607	0.0289045	NA	NA	NA	NA	-1.67727	3.97939e-09	-1.52566	NA	NA	-1.42	-1.03922	NA	NA	3.70314	NA	NA
hsa-miR-874-5p	NA	NA	NA	NA	NA	NA	-1.19635	6.82008e-05	NA	NA	NA	NA	-0.161655	NA	NA	1.15257	NA	NA
hsa-miR-876-3p	NA	NA	-3.66775	0.00621277	NA	NA	NA	NA	NA	NA	NA	NA	NA	NA	NA	NA	NA	NA
hsa-miR-876-5p	NA	NA	-2.74682	0.038481	NA	NA	NA	NA	NA	NA	NA	NA	NA	NA	NA	NA	NA	NA
hsa-miR-885-3p	NA	NA	3.07701	0.00202644	NA	NA	3.94988	1.50936e-09	NA	NA	NA	NA	NA	NA	NA	NA	NA	NA
hsa-miR-885-5p	3.43021	0.00865672	3.06059	0.00283062	3.33396	0.000586962	4.6428	3.96542e-14	1.86624	NA	NA	NA	1.50154	NA	NA	2.75954	NA	NA
hsa-miR-887-3p	NA	NA	NA	NA	NA	NA	NA	NA	0.137964	NA	NA	NA	-0.315047	NA	NA	-0.931208	NA	NA
hsa-miR-887-5p	NA	NA	NA	NA	NA	NA	NA	NA	0.107726	NA	NA	NA	NA	NA	NA	NA	NA	NA
hsa-miR-888-3p	NA	NA	3.46999	0.0377414	NA	NA	NA	NA	NA	NA	NA	NA	NA	NA	NA	NA	NA	NA
hsa-miR-888-5p	-5.05808	0.000741911	NA	NA	-3.45917	0.0149392	-6.08085	6.11545e-28	NA	NA	NA	NA	NA	NA	NA	3.78018	NA	NA
hsa-miR-889-3p	-2.4082	0.000206597	NA	NA	NA	NA	-1.58067	0.0111783	NA	NA	NA	NA	-0.75032	NA	NA	-0.890387	NA	NA
hsa-miR-890	NA	NA	-3.1647	0.0264837	NA	NA	-4.12774	9.36422e-08	NA	NA	NA	NA	NA	NA	NA	1.31814	NA	NA
hsa-miR-891a-5p	-4.87062	2.26298e-12	-3.11774	0.00636565	-3.78051	5.32217e-06	-6.35058	1.70048e-40	-2.67578	NA	NA	-1.15	-3.62139	NA	NA	6.92711	NA	NA
hsa-miR-891b	NA	NA	NA	NA	NA	NA	-3.06424	0.000386584	NA	NA	NA	NA	NA	NA	NA	4.07827	NA	NA
hsa-miR-892a	-3.84558	0.0014185	-2.97757	0.0201321	NA	NA	-5.84641	3.12751e-26	NA	NA	NA	NA	NA	NA	NA	4.80801	NA	NA
hsa-miR-892b	NA	NA	NA	NA	NA	NA	-2.79228	0.000999675	NA	NA	NA	NA	NA	NA	NA	3.02824	NA	NA
hsa-miR-892c-3p	NA	NA	NA	NA	NA	NA	-3.23554	4.23003e-05	NA	NA	NA	NA	NA	NA	NA	1.93663	NA	NA
hsa-miR-9-3p	NA	NA	-1.83537	0.0421637	NA	NA	NA	NA	NA	NA	NA	NA	NA	NA	NA	NA	NA	NA
hsa-miR-9-5p	-3.72627	5.2014e-06	-2.69818	0.000553192	NA	NA	-2.93633	7.12704e-06	-2.27109	NA	NA	NA	-1.63131	NA	NA	-2.33297	NA	NA
hsa-miR-92a-1-5p	NA	NA	NA	NA	NA	NA	NA	NA	NA	NA	NA	NA	NA	NA	NA	-0.179812	NA	NA
hsa-miR-92a-2-5p	NA	NA	NA	NA	NA	NA	-2.37178	0.0166125	NA	NA	NA	NA	NA	NA	NA	NA	NA	NA
hsa-miR-92a-3p	NA	NA	NA	NA	NA	NA	NA	NA	-0.44671	NA	NA	NA	0.24241	NA	NA	-0.298722	NA	NA
hsa-miR-92b-3p	1.12795	0.0492115	NA	NA	NA	NA	1.32563	4.079e-09	NA	NA	NA	0.76	0.640259	NA	NA	0.637514	NA	NA
hsa-miR-92b-5p	4.13025	0.016919	NA	NA	NA	NA	NA	NA	NA	NA	NA	NA	NA	NA	NA	NA	NA	NA
hsa-miR-93-3p	NA	NA	NA	NA	NA	NA	0.524588	0.0476789	0.331669	NA	NA	NA	0.653771	NA	NA	-0.21772	NA	NA
hsa-miR-93-5p	NA	NA	NA	NA	NA	NA	1.23048	6.13531e-09	1.18898	1.06	1	0.56	1.56182	1.61	NA	NA	NA	NA
hsa-miR-933	NA	NA	NA	NA	NA	NA	2.04915	0.0362909	NA	NA	NA	NA	NA	NA	NA	NA	NA	NA
hsa-miR-934	NA	NA	-3.24201	0.000718975	NA	NA	-6.88395	5.19244e-22	NA	NA	NA	NA	NA	NA	NA	NA	NA	NA
hsa-miR-935	NA	NA	NA	NA	NA	NA	2.12299	0.00464301	0.134567	NA	NA	NA	0.381272	NA	NA	0.198388	NA	NA
hsa-miR-937-3p	NA	NA	NA	NA	NA	NA	NA	NA	0.0879377	NA	NA	NA	0.190831	NA	NA	0.133927	NA	NA
hsa-miR-940	NA	NA	NA	NA	NA	NA	NA	NA	-0.11305	NA	NA	NA	NA	NA	NA	NA	NA	NA
hsa-miR-942-5p	NA	NA	NA	NA	NA	NA	1.31125	5.69097e-05	0.261073	NA	NA	NA	0.406053	NA	NA	0.653705	NA	NA
hsa-miR-95-3p	NA	NA	NA	NA	NA	NA	NA	NA	NA	NA	NA	NA	NA	NA	NA	-0.536698	NA	NA
hsa-miR-96-5p	NA	NA	NA	NA	NA	NA	-1.51947	5.18845e-07	-0.314483	NA	NA	NA	1.35758	NA	NA	2.56001	NA	NA
hsa-miR-98-3p	-1.38435	0.0330907	NA	NA	NA	NA	NA	NA	0.216086	NA	NA	NA	0.157979	NA	NA	NA	NA	NA
hsa-miR-98-5p	NA	NA	NA	NA	NA	NA	-0.626542	0.0143996	NA	NA	NA	NA	0.269744	NA	NA	-0.413205	NA	NA
hsa-miR-99a-3p	NA	NA	NA	NA	NA	NA	-0.682385	0.00771402	-0.280328	NA	NA	NA	NA	NA	NA	NA	NA	NA
hsa-miR-99a-5p	-1.1851	0.0357099	NA	NA	NA	NA	-0.611011	0.0108779	-0.43318	NA	NA	-0.63	NA	-0.77	NA	-0.797029	NA	NA
hsa-miR-99b-3p	NA	NA	NA	NA	NA	NA	NA	NA	NA	NA	NA	NA	0.552777	NA	NA	NA	NA	NA
hsa-miR-99b-5p	NA	NA	NA	NA	NA	NA	NA	NA	-0.380518	NA	NA	-0.51	NA	NA	-1.55	NA	NA	NA
