# Supplementary material for: Identification of RCC Subtype-Specific microRNAs–Meta-Analysis of High-Throughput RCC Tumor microRNA Expression Data
Source: Cancers (Basel). 2021 Feb 1;13(3):548. doi: 10.3390/cancers13030548 (PMC7867039; doi:10.3390/cancers13030548)
Supplement: Supplementary file 1 [file cancers-13-00548-s001.zip › Supplementary_File_S2.xlsx]

## Sheet: miR21-5p_targets
Gene	ensembl_id	logFC	logCPM	LR	PValue	FDR
KRIT1	ENSG00000001631	-0.0390859	3.12954	0.0623927	0.802753	0.861853
MYCBP2	ENSG00000005810	0.144843	5.8457	1.13629	0.286439	0.39503
LAMP2	ENSG00000005893	-0.0286928	7.77869	0.033262	0.855285	0.900755
E2F2	ENSG00000007968	3.46479	1.15469	76.5648	2.13e-18	5.6e-17
REV3L	ENSG00000009413	0.264963	4.66071	2.24155	0.134346	0.215277
BAZ1B	ENSG00000009954	0.599987	6.50194	22.9781	1.64e-06	8.64e-06
ZNF207	ENSG00000010244	0.216302	6.45515	2.99945	0.083293	0.144606
BTBD7	ENSG00000011114	-0.258772	5.42952	2.40958	0.120595	0.196921
PIK3C2A	ENSG00000011405	-0.220141	6.1464	2.42362	0.119519	0.195481
RABGAP1	ENSG00000011454	-0.29701	5.77679	4.65148	0.0310268	0.0629175
BRCA1	ENSG00000012048	1.35083	2.73477	28.6777	8.55e-08	5.64e-07
POLR3B	ENSG00000013503	-0.94754	3.27892	26.4497	2.7e-07	1.64e-06
RUFY3	ENSG00000018189	0.411095	5.5502	3.69367	0.0546193	0.101596
ZRANB1	ENSG00000019995	-0.224032	3.70037	2.18298	0.139544	0.222237
ERP44	ENSG00000023318	-0.0340612	5.90995	0.0926333	0.760856	0.830279
PHF20	ENSG00000025293	0.413372	5.22176	9.62751	0.00191685	0.00541016
SEC63	ENSG00000025796	0.256701	6.36385	3.66304	0.0556321	0.103182
FAS	ENSG00000026103	1.19291	4.99028	31.9534	1.58e-08	1.17e-07
HMGB3	ENSG00000029993	-0.332188	3.84218	1.19337	0.27465	0.38214
CENPQ	ENSG00000031691	0.69491	2.0461	12.0493	0.000518112	0.00166114
ARID4A	ENSG00000032219	-0.0295117	4.86316	0.0446312	0.832684	0.884352
MAP2K3	ENSG00000034152	-0.360795	5.87708	10.4357	0.00123603	0.00364822
FAM136A	ENSG00000035141	0.0577045	4.99427	0.150266	0.698282	0.779917
NSUN2	ENSG00000037474	0.335593	5.705	10.1482	0.00144445	0.00418498
ZFYVE16	ENSG00000039319	0.30854	5.46741	5.77094	0.0162933	0.0360624
RAI14	ENSG00000039560	0.0414135	6.02244	0.0440186	0.833819	0.885111
MRPS10	ENSG00000048544	-0.277507	4.9292	3.86769	0.0492242	0.0929723
RSF1	ENSG00000048649	0.0492107	5.4745	0.176158	0.674696	0.761099
PER3	ENSG00000049246	0.120178	5.12531	0.298471	0.584843	0.685033
FOXP3	ENSG00000049768	2.47988	1.64227	27.1432	1.89e-07	1.17e-06
FOXN3	ENSG00000053254	0.680069	5.73231	13.9296	0.000189782	0.000670373
SYNE2	ENSG00000054654	-0.824977	7.66964	10.9656	0.000928207	0.002823
PITHD1	ENSG00000057757	0.0493524	5.13141	0.147389	0.701043	0.78226
ATP11B	ENSG00000058063	0.194175	5.70792	1.65422	0.198386	0.294672
ATP2B4	ENSG00000058668	1.36932	7.00949	51.333	7.8e-13	1.03e-11
WNK1	ENSG00000060237	-0.94087	7.64232	25.2214	5.11e-07	2.94e-06
BCAT1	ENSG00000060982	1.95274	4.75239	61.8752	3.66e-15	6.37e-14
MON2	ENSG00000061987	0.0271136	5.73712	0.0312757	0.859627	0.903724
CASP8	ENSG00000064012	0.720781	5.03969	19.0908	1.25e-05	5.65e-05
LIMCH1	ENSG00000064042	-0.264197	6.30891	1.19904	0.273513	0.380966
SLK	ENSG00000065613	-0.102246	6.38232	0.66746	0.413939	0.527439
MYO9A	ENSG00000066933	0.0168898	6.03561	0.0103534	0.918954	0.945618
PLPP1	ENSG00000067113	0.357382	6.65691	2.5837	0.107969	0.179407
NAV3	ENSG00000067798	0.84467	1.7503	4.32443	0.037569	0.0740067
MEF2A	ENSG00000068305	0.531424	6.26743	13.838	0.000199262	0.000701293
SIRT2	ENSG00000068903	0.0564081	5.96934	0.210649	0.646259	0.737826
TGFBR3	ENSG00000069702	-2.07593	5.69843	83.9438	5.09e-20	1.64e-18
LRP6	ENSG00000070018	-0.649082	5.42163	12.5835	0.000389169	0.00128235
PTPN3	ENSG00000070159	-1.43451	5.83668	35.2448	2.91e-09	2.4e-08
EXOC5	ENSG00000070367	0.0417773	5.65795	0.0725887	0.787604	0.8502
TESK2	ENSG00000070759	-0.342295	2.26793	1.61315	0.20405	0.301422
OSBPL3	ENSG00000070882	0.534995	5.45477	7.69916	0.00552466	0.013893
MGAT4A	ENSG00000071073	-0.222229	6.39069	2.06058	0.151152	0.237282
CYBRD1	ENSG00000071967	-0.0854936	6.05254	0.0728611	0.787216	0.84982
RDH11	ENSG00000072042	-1.57549	6.17625	64.6437	8.97e-16	1.69e-14
MPP5	ENSG00000072415	-1.55136	5.50976	72.1314	2.01e-17	4.66e-16
SMC1A	ENSG00000072501	-0.0201813	6.314	0.013821	0.906414	0.936376
TP63	ENSG00000073282	-0.284509	0.0654013	0.261436	0.609135	0.705706
FERMT2	ENSG00000073712	-0.789956	6.05613	41.2532	1.34e-10	1.32e-09
ST6GAL1	ENSG00000073849	-0.864384	6.88567	7.76177	0.00533636	0.0134721
ZNF532	ENSG00000074657	1.31039	6.19428	69.6193	7.19e-17	1.57e-15
ACAT1	ENSG00000075239	-2.21082	7.53413	52.4214	4.48e-13	6.05e-12
PLD1	ENSG00000075651	-0.713262	5.11128	10.4843	0.00120396	0.00356537
DLG1	ENSG00000075711	-0.236477	5.93144	1.89091	0.1691	0.260027
KIFAP3	ENSG00000075945	-0.0196787	5.39206	0.0165341	0.897686	0.930389
PAG1	ENSG00000076641	2.1286	5.26357	110.882	6.28e-26	4.03e-24
NT5C2	ENSG00000076685	-0.401758	4.35444	6.53403	0.010583	0.0247232
TM9SF3	ENSG00000077147	-0.0011217	7.56534	7.48e-05	0.993101	0.995424
JADE1	ENSG00000077684	-0.588611	5.66203	11.2331	0.000803517	0.00247675
HOXA9	ENSG00000078399	-1.54821	3.97819	12.0452	0.000519248	0.00166456
SAR1A	ENSG00000079332	0.0151576	6.51705	0.0193835	0.889272	0.924402
MOXD1	ENSG00000079931	-1.76936	4.34837	15.8562	6.83e-05	0.000264932
SESN1	ENSG00000080546	0.425007	4.73698	10.9038	0.000959672	0.00290435
MEF2C	ENSG00000081189	1.49385	6.00831	58.8877	1.67e-14	2.68e-13
COBLL1	ENSG00000082438	-1.81073	6.21255	51.4672	7.28e-13	9.62e-12
KAT6A	ENSG00000083168	0.290959	5.75273	3.84016	0.0500387	0.0943107
TNPO1	ENSG00000083312	0.0339692	6.57188	0.0690831	0.792676	0.853829
REST	ENSG00000084093	-0.0806679	5.27794	0.39549	0.529427	0.636147
ATRX	ENSG00000085224	-0.0431192	6.18823	0.0885384	0.766044	0.833818
ABCB1	ENSG00000085563	-2.70177	5.78332	63.4216	1.67e-15	3.04e-14
DDHD2	ENSG00000085788	0.403303	5.58159	8.80778	0.00299948	0.0080517
MMP2	ENSG00000087245	0.425407	6.55425	1.40749	0.235473	0.338344
KLHL42	ENSG00000087448	-0.264648	4.63265	3.86386	0.0493368	0.0931623
DNM1L	ENSG00000087470	-0.20507	5.79692	1.82053	0.177251	0.269838
C20orf194	ENSG00000088854	-0.340253	5.4838	7.31593	0.0068346	0.0167754
ICAM1	ENSG00000090339	2.28001	6.60763	45.8597	1.27e-11	1.43e-10
GLG1	ENSG00000090863	-0.120805	7.91761	0.831525	0.361832	0.475206
WDR7	ENSG00000091157	0.0070482	4.38211	0.00198633	0.964451	0.976511
HECTD1	ENSG00000092148	-0.248777	6.82535	2.69597	0.100602	0.169079
TRPM7	ENSG00000092439	-0.346844	5.80702	6.16856	0.0130041	0.0296202
RFFL	ENSG00000092871	-0.0815767	4.17279	0.201816	0.653259	0.743837
TGFB2	ENSG00000092969	0.679649	2.52812	3.62075	0.0570632	0.105431
MSH2	ENSG00000095002	0.667003	4.38934	21.6867	3.21e-06	1.62e-05
MAP3K1	ENSG00000095015	0.106509	5.41921	0.389667	0.532475	0.638973
FKBP5	ENSG00000096060	-0.261767	6.85268	0.625416	0.429042	0.542078
MTAP	ENSG00000099810	0.106929	4.53281	0.604344	0.436926	0.54958
MKNK2	ENSG00000099875	-0.108457	7.11211	0.49589	0.481312	0.591562
TIMP3	ENSG00000100234	-0.620777	9.18438	6.33945	0.0118081	0.0272418
TNRC6B	ENSG00000100354	-0.0237346	5.06441	0.0402554	0.840982	0.890185
NIN	ENSG00000100503	0.334436	5.59899	3.73545	0.0532692	0.0994685
DAAM1	ENSG00000100592	-0.89196	4.10227	15.2832	9.25e-05	0.000348962
HIF1A	ENSG00000100644	-0.291852	6.97051	2.21647	0.136545	0.218152
EIF5	ENSG00000100664	-0.559304	7.28094	18.9022	1.38e-05	6.17e-05
DICER1	ENSG00000100697	-0.446829	5.92181	7.33125	0.0067766	0.0166489
DCAF11	ENSG00000100897	-1.27726	6.06788	62.1178	3.24e-15	5.68e-14
MMP9	ENSG00000100985	4.09289	6.00646	92.1118	8.19e-22	3.27e-20
ADNP	ENSG00000101126	0.241309	6.36433	5.08414	0.0241456	0.0507592
JAG1	ENSG00000101384	1.03121	7.45184	33.843	5.97e-09	4.72e-08
E2F1	ENSG00000101412	3.60145	2.92624	115.732	5.44e-27	3.95e-25
SMAD7	ENSG00000101665	0.258316	5.81409	3.66452	0.0555827	0.103115
MIB1	ENSG00000101752	-0.306335	5.51578	4.39385	0.0360688	0.0715139
STAG2	ENSG00000101972	0.126028	6.46747	0.902198	0.342193	0.454367
FMR1	ENSG00000102081	-0.635166	5.87637	16.8356	4.08e-05	0.000165872
RP2	ENSG00000102218	0.838065	4.34112	30.6602	3.07e-08	2.18e-07
JADE3	ENSG00000102221	-0.0593374	3.5315	0.118509	0.730658	0.806933
ARMCX3	ENSG00000102401	-0.0242361	6.05312	0.0291886	0.864344	0.907119
KLF5	ENSG00000102554	-0.737007	3.17502	9.74331	0.00179976	0.00511335
MSLN	ENSG00000102854	-0.775391	4.44374	0.661143	0.416157	0.529496
NFAT5	ENSG00000102908	-0.0860411	5.44777	0.103741	0.747386	0.819944
STUB1	ENSG00000103266	-0.247998	5.00851	2.60973	0.10621	0.17695
CEP152	ENSG00000103995	0.38246	2.55989	3.10819	0.0778996	0.136615
SPG11	ENSG00000104133	0.266769	6.11193	3.41466	0.0646198	0.117012
MYEF2	ENSG00000104177	-0.322287	4.65544	3.06313	0.0800874	0.139922
SGK3	ENSG00000104205	-0.327906	4.48483	2.5164	0.112667	0.186115
PLAT	ENSG00000104368	-1.88291	5.81503	52.8114	3.67e-13	5.01e-12
JPH1	ENSG00000104369	-0.685679	1.03978	3.10229	0.0781823	0.137038
UBR5	ENSG00000104517	0.147231	6.25575	1.12037	0.289838	0.398698
MTMR9	ENSG00000104643	-0.0534298	3.89785	0.127163	0.721392	0.799483
AKT2	ENSG00000105221	-0.335212	6.76455	7.31856	0.00682459	0.0167526
TMEM147	ENSG00000105677	-0.372281	5.68711	9.08855	0.00257215	0.00701352
CDK6	ENSG00000105810	0.197791	5.30748	0.751687	0.385943	0.499981
ITGB8	ENSG00000105855	-0.164743	6.95608	0.152536	0.696124	0.778032
MTPN	ENSG00000105887	0.622972	7.02261	23.6823	1.14e-06	6.14e-06
LMBR1	ENSG00000105983	-0.116012	5.35423	0.683367	0.40843	0.52193
PLEKHA8	ENSG00000106086	-0.312231	4.10286	2.56012	0.10959	0.181759
PLOD3	ENSG00000106397	1.20671	6.94278	39.5456	3.2e-10	3.01e-09
GLCCI1	ENSG00000106415	0.108515	3.89313	0.169089	0.680923	0.766034
SPIN1	ENSG00000106723	-0.456093	6.67171	12.6138	0.000382917	0.00126319
TMEM245	ENSG00000106771	-0.75196	6.77372	27.9815	1.22e-07	7.85e-07
MEGF9	ENSG00000106780	-0.548588	5.29231	9.32162	0.00226465	0.0062748
CORO2A	ENSG00000106789	0.934026	2.7516	8.79925	0.00301354	0.0080838
RAB11FIP2	ENSG00000107560	-0.357546	4.76366	6.79894	0.00912122	0.0216868
PLEKHA1	ENSG00000107679	0.421587	6.75905	3.63107	0.0567102	0.104929
ARHGAP21	ENSG00000107863	0.303215	5.91496	4.76905	0.0289758	0.0593352
CPEB3	ENSG00000107864	-0.915934	3.22328	16.2532	5.54e-05	0.000219109
ACBD5	ENSG00000107897	-0.419782	5.81441	6.10409	0.0134869	0.0305757
EDRF1	ENSG00000107938	0.337226	3.74041	6.00955	0.0142287	0.0320595
PPIF	ENSG00000108179	-0.206629	5.97455	0.862478	0.353046	0.466205
NUFIP2	ENSG00000108256	0.3117	6.41744	5.09252	0.0240293	0.0505285
WSB1	ENSG00000109046	0.404528	7.3138	5.0257	0.0249739	0.0522397
SLAIN2	ENSG00000109171	0.083536	5.53434	0.425676	0.514118	0.622208
NFKB1	ENSG00000109320	0.526885	5.91801	17.6587	2.64e-05	0.000111569
WFS1	ENSG00000109501	-0.321915	4.90191	4.86305	0.0274377	0.0566509
SOD3	ENSG00000109610	-2.11578	6.35283	45.7079	1.37e-11	1.54e-10
TRIM2	ENSG00000109654	-1.4101	5.80328	26.6044	2.5e-07	1.52e-06
NSD2	ENSG00000109685	0.609924	5.4935	14.7613	0.000122016	0.000448516
NCAPG	ENSG00000109805	3.5334	1.99049	95.1588	1.76e-22	7.47e-21
CCDC34	ENSG00000109881	0.971891	2.92568	15.0252	0.000106084	0.000395794
HIPK3	ENSG00000110422	-0.485351	6.81762	9.31121	0.00227756	0.00630378
FBXO3	ENSG00000110429	-0.56658	5.74294	13.3392	0.000259911	0.000888156
HPS5	ENSG00000110756	0.13378	4.71899	1.07901	0.298918	0.408494
PSMD9	ENSG00000110801	-0.328714	3.04294	5.04162	0.0247453	0.0518271
BCL7A	ENSG00000110987	-0.833147	4.83153	25.2322	5.08e-07	2.93e-06
CDK2AP1	ENSG00000111328	0.778027	5.28496	24.7998	6.36e-07	3.59e-06
DDX55	ENSG00000111364	0.606993	4.05831	16.9824	3.77e-05	0.00015464
BTN3A3	ENSG00000111801	1.56412	5.66533	81.6063	1.66e-19	5.09e-18
DSE	ENSG00000111817	0.574746	5.13848	5.10177	0.0239014	0.0503098
SASH1	ENSG00000111961	0.287172	5.99504	2.48116	0.115217	0.189665
E2F3	ENSG00000112242	-0.0815573	4.23693	0.225986	0.634516	0.728009
CRYBG1	ENSG00000112297	0.0461134	6.29634	0.0485857	0.825543	0.879106
TRIM38	ENSG00000112343	0.561094	6.08255	6.72569	0.00950337	0.0224938
SLC16A10	ENSG00000112394	-3.03328	3.54431	64.4842	9.73e-16	1.83e-14
PHACTR2	ENSG00000112419	0.432234	4.94268	6.05406	0.0138744	0.0313558
EPM2A	ENSG00000112425	-1.43482	3.36653	52.2298	4.94e-13	6.65e-12
VEGFA	ENSG00000112715	2.73031	10.726	78.295	8.87e-19	2.46e-17
SEMA5A	ENSG00000112902	-1.25708	5.79531	18.4051	1.79e-05	7.81e-05
CCNG1	ENSG00000113328	-0.332452	6.93401	4.00405	0.0453911	0.0868017
LIFR	ENSG00000113594	-0.925478	6.20726	15.029	0.000105873	0.000395196
TTC33	ENSG00000113638	-0.101066	3.66467	0.455451	0.499758	0.608741
CSNK1A1	ENSG00000113712	0.643179	6.1097	21.1707	4.2e-06	2.07e-05
BCL6	ENSG00000113916	1.44466	5.81334	46.7736	7.97e-12	9.26e-11
WNT5A	ENSG00000114251	-0.170773	2.8034	0.233256	0.62912	0.723358
FGF12	ENSG00000114279	-0.733892	1.81602	3.55228	0.0594639	0.109135
GNB4	ENSG00000114450	1.42421	4.93689	57.5645	3.27e-14	5.03e-13
KLHL24	ENSG00000114796	0.0554814	5.81005	0.155508	0.693326	0.775692
ZBTB47	ENSG00000114853	-0.159121	4.26931	0.593524	0.44106	0.553458
NKTR	ENSG00000114857	0.0411099	5.95591	0.045135	0.831756	0.883853
KANSL3	ENSG00000114982	0.0811024	6.07588	0.474391	0.490974	0.600684
CCL20	ENSG00000115009	2.46788	4.66474	20.2541	6.78e-06	3.22e-05
GPD2	ENSG00000115159	0.540603	4.94971	8.31733	0.00392686	0.0102466
CLIP4	ENSG00000115295	-0.326436	4.21273	1.46875	0.225544	0.326589
RTN4	ENSG00000115310	-0.223002	8.67361	1.41434	0.234337	0.337108
USP34	ENSG00000115464	0.10171	5.91397	0.292807	0.588427	0.688099
ORC4	ENSG00000115947	-0.353825	4.9764	6.08479	0.013635	0.0308691
ATF2	ENSG00000115966	0.233535	5.58719	3.19986	0.0736444	0.130407
MSH6	ENSG00000116062	0.397371	5.20039	10.336	0.00130463	0.00382246
EPHA4	ENSG00000116106	-0.933708	3.95718	11.9072	0.000559173	0.00178218
ALMS1	ENSG00000116127	0.365943	4.37453	5.92856	0.0148974	0.0333778
DNAJC16	ENSG00000116138	-1.56879	5.3531	62.3457	2.88e-15	5.09e-14
RALGPS2	ENSG00000116191	-0.125329	4.18355	0.278579	0.597634	0.695723
FAM20B	ENSG00000116199	-0.0482319	5.69646	0.109503	0.74071	0.814887
TCEANC2	ENSG00000116205	-0.0477144	3.47804	0.0938228	0.759372	0.829311
DOCK7	ENSG00000116641	0.410944	5.19171	6.17651	0.0129457	0.0295047
IVNS1ABP	ENSG00000116679	0.0110167	8.69624	0.00253449	0.959848	0.973681
SRSF11	ENSG00000116754	0.15612	7.20149	1.20143	0.273036	0.380513
PHTF1	ENSG00000116793	0.518487	4.07483	9.83805	0.00170939	0.00488655
EXOC8	ENSG00000116903	0.288977	4.14699	4.05112	0.0441422	0.0847562
TSNAX	ENSG00000116918	-0.15127	4.76134	0.921375	0.337114	0.448878
RRAGC	ENSG00000116954	0.306075	4.43325	5.35448	0.0206691	0.0443159
ABCD3	ENSG00000117528	-1.31575	6.11932	38.0033	7.06e-10	6.31e-09
FASLG	ENSG00000117560	3.21985	1.66131	57.8224	2.87e-14	4.44e-13
ESYT2	ENSG00000117868	0.735876	7.26447	26.0329	3.36e-07	2e-06
ELOVL4	ENSG00000118402	-1.34777	0.556478	22.3643	2.26e-06	1.17e-05
TNFAIP3	ENSG00000118503	1.96664	5.93581	130.517	3.16e-30	3.37e-28
TCF21	ENSG00000118526	-4.39815	3.3206	145.04	2.11e-33	3.11e-31
FOXO3	ENSG00000118689	0.332856	5.93702	5.01104	0.0251862	0.0526362
PKD2	ENSG00000118762	0.108036	6.75136	0.455659	0.49966	0.608654
LDAH	ENSG00000118961	-0.670909	4.17128	15.3018	9.16e-05	0.000345933
KLF9	ENSG00000119138	-0.715491	6.60832	11.2929	0.000778054	0.00240595
PTBP3	ENSG00000119314	-0.0779968	6.39322	0.304012	0.581378	0.681961
SET	ENSG00000119335	0.0558223	7.64002	0.157627	0.691351	0.773995
CNTRL	ENSG00000119397	0.552063	4.08555	11.2335	0.00080334	0.00247654
RHOQ	ENSG00000119729	0.290157	5.80063	4.36172	0.0367551	0.0727189
ATAD2B	ENSG00000119778	0.255108	3.7606	2.2392	0.134551	0.215486
AFTPH	ENSG00000119844	-0.589179	6.22112	8.71521	0.00315566	0.00842698
SLC17A5	ENSG00000119899	-0.470144	5.6494	7.54331	0.00602332	0.0150084
GPAM	ENSG00000119927	-0.299153	3.62757	3.55183	0.0594797	0.109155
SMNDC1	ENSG00000119953	0.050945	4.61293	0.200691	0.654164	0.744575
PROSER1	ENSG00000120685	0.137252	4.78869	0.774655	0.378781	0.492798
KBTBD7	ENSG00000120696	-0.546982	3.56988	14.0034	0.000182482	0.000646561
TGFBI	ENSG00000120708	4.4579	10.5881	51.0214	9.14e-13	1.19e-11
APAF1	ENSG00000120868	0.927765	4.24609	28.8042	8.01e-08	5.3e-07
CLU	ENSG00000120885	1.13672	10.4703	9.4009	0.00216879	0.00604244
TNFRSF10B	ENSG00000120889	1.56231	6.67008	106.841	4.82e-25	2.76e-23
TSHZ3	ENSG00000121297	0.493748	3.31279	4.04857	0.0442087	0.0848503
NAA50	ENSG00000121579	-0.30884	6.22521	3.58867	0.0581747	0.107228
ZMYM2	ENSG00000121741	-0.0801842	6.01548	0.434805	0.509641	0.618146
FMOD	ENSG00000122176	0.37195	5.05169	0.435553	0.509277	0.617826
SERAC1	ENSG00000122335	-0.924954	2.91018	33.864	5.91e-09	4.68e-08
PTGFR	ENSG00000122420	-2.21534	2.22231	26.3988	2.78e-07	1.68e-06
HERPUD2	ENSG00000122557	0.595122	5.06389	20.2294	6.87e-06	3.26e-05
RECK	ENSG00000122707	0.175142	4.02162	0.860756	0.353527	0.466654
DCAF10	ENSG00000122741	-0.568858	4.99858	18.8438	1.42e-05	6.34e-05
CALD1	ENSG00000122786	0.449869	8.72478	4.6369	0.0312915	0.0633609
VPS26A	ENSG00000122958	-0.0286644	5.68044	0.0658668	0.797453	0.857669
RNF11	ENSG00000123091	-0.242091	6.69248	2.66735	0.102426	0.171721
WWP1	ENSG00000123124	-0.0801527	6.10029	0.271705	0.60219	0.699371
LPGAT1	ENSG00000123684	1.06545	6.25541	26.5884	2.52e-07	1.53e-06
PFKFB2	ENSG00000123836	-2.31443	5.05441	64.2183	1.11e-15	2.08e-14
AGO2	ENSG00000123908	0.403499	5.38128	7.97028	0.00475515	0.0121505
NCOA3	ENSG00000124151	0.214409	5.58153	2.2861	0.130537	0.210251
RAB22A	ENSG00000124209	0.195526	5.53044	2.27187	0.131741	0.211776
LRRFIP1	ENSG00000124831	0.268456	6.95727	3.05546	0.0804662	0.140478
HS3ST3B1	ENSG00000125430	-1.20906	2.42676	19.5963	9.57e-06	4.43e-05
IL1B	ENSG00000125538	1.50795	3.74015	14.3893	0.000148645	0.000536355
THOC2	ENSG00000125676	-0.107477	5.52977	0.824381	0.363902	0.477357
TMX4	ENSG00000125827	0.0843196	6.3709	0.298258	0.584976	0.68512
GDF5	ENSG00000125965	-1.90873	-1.54277	3.4324	0.063929	0.115951
CCR7	ENSG00000126353	2.7802	2.08757	31.9769	1.56e-08	1.16e-07
FGFRL1	ENSG00000127418	-0.0141071	5.66327	0.0066573	0.934971	0.956878
SMARCA4	ENSG00000127616	-0.278946	6.60801	4.58109	0.0323267	0.0651046
RNF6	ENSG00000127870	0.151178	5.01596	1.43324	0.231237	0.333394
AKAP9	ENSG00000127914	-0.200424	6.21194	2.29286	0.12997	0.209541
DOCK4	ENSG00000128512	1.06111	5.52789	35.7016	2.3e-09	1.92e-08
PALLD	ENSG00000129116	-0.7119	6.6258	8.20178	0.00418493	0.0108479
PHF20L1	ENSG00000129292	0.158164	5.0909	1.24365	0.264769	0.371067
ATXN10	ENSG00000130638	0.00789299	6.07913	0.00373923	0.95124	0.967888
TXLNGY	ENSG00000131002	-0.57387	3.75215	2.7374	0.0980243	0.165371
LATS1	ENSG00000131023	0.222137	4.8993	2.64878	0.10363	0.173438
TRAF7	ENSG00000131653	-0.14059	5.78923	1.29414	0.255286	0.360813
TOP2A	ENSG00000131747	3.98337	4.40506	221.562	4.13e-50	3.05e-47
PIAS3	ENSG00000131788	0.414904	4.68533	7.30703	0.00686854	0.0168337
PRKAB2	ENSG00000131791	0.218888	4.74975	1.71118	0.190832	0.285816
PER2	ENSG00000132326	0.726254	4.94198	17.8143	2.44e-05	0.000103696
BTBD3	ENSG00000132640	0.282199	5.39972	3.68964	0.0547514	0.101743
DCAF8	ENSG00000132716	-0.271571	5.71254	3.83731	0.0501238	0.0944405
LARS	ENSG00000133706	0.332918	6.58352	5.69903	0.0169743	0.0373447
EIF2S1	ENSG00000134001	0.222206	5.62659	3.49694	0.0614822	0.112146
VHL	ENSG00000134086	-0.281554	4.51297	4.59995	0.0319729	0.0644861
SOX5	ENSG00000134532	-0.597458	1.61463	2.7331	0.0982883	0.165756
AGO4	ENSG00000134698	0.643839	4.67021	19.4136	1.05e-05	4.83e-05
CLOCK	ENSG00000134852	0.0761731	5.07167	0.222833	0.63689	0.730161
APC	ENSG00000134982	0.126409	5.13556	0.732283	0.392144	0.505977
DMTF1	ENSG00000135164	0.221494	5.84678	1.67293	0.195866	0.291695
SRPK2	ENSG00000135250	0.206988	4.80356	2.39724	0.121549	0.198312
MRAP2	ENSG00000135324	-4.19051	0.383026	38.8395	4.6e-10	4.24e-09
CAPRIN1	ENSG00000135387	0.179279	7.37508	2.11047	0.146295	0.231098
DYNC1LI2	ENSG00000135720	-0.000986497	6.35741	3.04e-05	0.9956	0.996891
EGLN1	ENSG00000135766	0.702908	6.82644	18.3652	1.82e-05	7.96e-05
DOCK10	ENSG00000135905	2.18359	5.17727	86.0981	1.71e-20	5.87e-19
REV1	ENSG00000135945	-0.00603433	4.9502	0.00167176	0.967386	0.978384
ISCU	ENSG00000136003	-0.969122	7.04124	25.7826	3.82e-07	2.25e-06
VPS36	ENSG00000136100	-0.0859168	5.66547	0.361393	0.547734	0.652457
SPRY2	ENSG00000136158	-0.432827	4.66019	5.12586	0.0235719	0.0496885
SCRN1	ENSG00000136193	-0.244642	6.18567	0.591314	0.441911	0.554196
TNS3	ENSG00000136205	-0.294727	8.09639	3.49681	0.0614873	0.112146
IREB2	ENSG00000136381	0.112222	5.79517	0.931959	0.334354	0.446076
UGGT1	ENSG00000136731	0.432807	6.20953	6.93773	0.0084396	0.0202538
YME1L1	ENSG00000136758	0.219798	6.98674	3.15048	0.0759045	0.133775
SLC31A1	ENSG00000136868	-0.87725	5.66817	27.5016	1.57e-07	9.89e-07
TLR4	ENSG00000136869	1.00028	5.51048	38.1578	6.52e-10	5.87e-09
DERL1	ENSG00000136986	1.01822	6.24537	55.5135	9.28e-14	1.36e-12
MYC	ENSG00000136997	2.07437	6.34412	41.7199	1.05e-10	1.05e-09
NEK1	ENSG00000137601	0.207414	4.16103	2.06429	0.150786	0.23677
KNL1	ENSG00000137812	-1.18105	2.47192	17.7112	2.57e-05	0.000108731
ACTR2	ENSG00000138071	0.571847	7.77798	20.4431	6.14e-06	2.94e-05
PREPL	ENSG00000138078	-0.456679	6.03483	11.1604	0.000835602	0.00256541
FBXO11	ENSG00000138081	0.236588	4.60866	2.51074	0.113073	0.186652
TET1	ENSG00000138336	0.236522	0.76303	0.374596	0.54051	0.646245
PARP9	ENSG00000138496	0.674687	6.03872	21.1239	4.31e-06	2.12e-05
SECISBP2L	ENSG00000138593	-0.314063	6.14502	3.79341	0.0514547	0.0966144
AP1AR	ENSG00000138660	-0.229026	4.80126	1.74833	0.186087	0.280323
RNF185	ENSG00000138942	-0.271905	5.75	2.82999	0.0925191	0.157629
ETNK1	ENSG00000139163	-0.38169	5.83779	5.65504	0.0174053	0.038166
SCAF11	ENSG00000139218	0.354798	6.75783	7.74233	0.00539413	0.0135958
RB1	ENSG00000139687	0.903327	6.23127	33.973	5.59e-09	4.44e-08
SETD1B	ENSG00000139718	0.136184	5.41701	0.889841	0.345521	0.457968
NAA30	ENSG00000139977	-0.222301	4.63221	2.24017	0.134466	0.21544
BNIP2	ENSG00000140299	0.492494	5.79078	14.5555	0.000136094	0.000495622
ANP32A	ENSG00000140350	0.167495	6.70018	1.65807	0.197864	0.294104
TPM1	ENSG00000140416	1.41622	8.39425	34.9634	3.36e-09	2.74e-08
IGF1R	ENSG00000140443	-0.704394	6.63607	11.5316	0.000684232	0.00214243
FANCI	ENSG00000140525	1.87245	3.45245	114.776	8.81e-27	6.26e-25
MED9	ENSG00000141026	-0.0804707	4.17701	0.246814	0.619327	0.714832
GID4	ENSG00000141034	-0.308784	3.84493	3.49343	0.0616129	0.112331
OSBPL1A	ENSG00000141447	0.00461338	5.8815	0.000720625	0.978584	0.986078
CBX4	ENSG00000141582	0.537633	4.51809	9.06422	0.0026066	0.00709665
ERBB2	ENSG00000141736	-1.45957	7.25108	46.3848	9.72e-12	1.11e-10
BCL10	ENSG00000142867	0.381263	4.15796	8.63094	0.00330502	0.00878632
VASH2	ENSG00000143494	0.203415	0.907584	0.185581	0.66662	0.75472
DUSP10	ENSG00000143507	1.54375	3.11132	29.8674	4.63e-08	3.19e-07
TP53BP2	ENSG00000143514	0.0910887	5.29778	0.413193	0.520353	0.627851
PARP1	ENSG00000143799	0.379533	6.63268	8.13393	0.00434444	0.011199
PPFIA4	ENSG00000143847	2.5581	5.55607	34.2173	4.93e-09	3.95e-08
OSR1	ENSG00000143867	0.0278983	1.24028	0.00802981	0.928598	0.952579
RHOB	ENSG00000143878	0.0946692	9.23571	0.126409	0.722185	0.800056
VPS54	ENSG00000143952	-0.0277309	5.28287	0.0470975	0.828193	0.881037
MEIS1	ENSG00000143995	-0.601997	3.85539	6.21468	0.0126695	0.0289607
LNPK	ENSG00000144320	1.07018	5.28834	54.2395	1.77e-13	2.52e-12
UBR3	ENSG00000144357	-0.352695	5.63263	4.97004	0.0257901	0.0537382
GOLGA4	ENSG00000144674	-0.952036	6.33096	48.637	3.08e-12	3.74e-11
BOC	ENSG00000144857	0.059028	4.0998	0.0820855	0.774491	0.840196
CYP4V2	ENSG00000145476	-0.93547	6.28603	20.3136	6.57e-06	3.13e-05
SKP2	ENSG00000145604	0.684679	3.31109	14.1729	0.000166753	0.000595845
PIK3R1	ENSG00000145675	0.184704	6.36419	0.807825	0.368764	0.482531
HAPLN1	ENSG00000145681	5.63484	3.76589	240.524	3.02e-54	3.68e-51
RASA1	ENSG00000145715	0.521535	5.24327	12.4557	0.000416719	0.0013644
FBXL17	ENSG00000145743	-0.135658	4.99706	0.679207	0.40986	0.523556
DDX46	ENSG00000145833	0.0215323	5.71008	0.0328215	0.856236	0.901306
PHIP	ENSG00000146247	0.3469	5.63154	2.91303	0.0878668	0.151198
PM20D2	ENSG00000146281	-0.133291	4.44139	0.433499	0.510277	0.618692
EGFR	ENSG00000146648	1.94527	7.88146	136.048	1.95e-31	2.34e-29
PURB	ENSG00000146676	0.489177	6.01257	16.0464	6.18e-05	0.000242107
TAF1	ENSG00000147133	0.167527	5.26849	2.01202	0.156058	0.243579
DOCK5	ENSG00000147459	0.963783	4.91748	29.2859	6.24e-08	4.21e-07
NSD3	ENSG00000147548	0.126588	5.80829	1.25857	0.261921	0.367967
NFIB	ENSG00000147862	-0.0243312	6.32095	0.0188304	0.890854	0.925711
SNX30	ENSG00000148158	-0.969633	5.98959	13.6808	0.000216657	0.000755396
EIF4EBP2	ENSG00000148730	-0.524579	7.68134	9.14512	0.00249383	0.00682407
TAF5	ENSG00000148835	0.326074	2.13317	2.52507	0.11205	0.185267
LIN7C	ENSG00000148943	-0.194144	4.67804	1.33238	0.248382	0.353149
PDCD4	ENSG00000150593	0.546687	5.69867	17.5293	2.83e-05	0.000118689
MTMR12	ENSG00000150712	-0.193551	5.56415	1.25258	0.26306	0.369145
FOXO1	ENSG00000150907	-0.642142	4.87471	8.41406	0.0037233	0.00976823
NUBPL	ENSG00000151413	-1.03502	3.73416	30.7161	2.99e-08	2.12e-07
WWC2	ENSG00000151718	-0.414925	5.69176	7.26193	0.00704317	0.0172271
TMEM56	ENSG00000152078	-1.04281	3.37208	25.5343	4.35e-07	2.53e-06
PTPN14	ENSG00000152104	0.359787	6.26602	2.93866	0.0864827	0.149226
JMY	ENSG00000152409	-1.16487	4.31233	45.486	1.54e-11	1.71e-10
PAN3	ENSG00000152520	0.153746	5.26477	1.30495	0.253311	0.358714
MBNL1	ENSG00000152601	0.70299	7.0945	27.6495	1.45e-07	9.2e-07
GPD1L	ENSG00000152642	-1.83194	5.05665	58.9081	1.65e-14	2.65e-13
RASGRP3	ENSG00000152689	1.07148	5.22176	42.8594	5.88e-11	6.08e-10
UTRN	ENSG00000152818	0.465151	7.03699	6.50223	0.0107739	0.0251388
FBXL2	ENSG00000153558	-0.63789	3.08956	8.20307	0.00418195	0.0108413
RMND5A	ENSG00000153561	-0.60722	5.74395	14.689	0.000126787	0.000464871
DDAH1	ENSG00000153904	-1.46186	7.20372	32.6064	1.13e-08	8.57e-08
SREK1	ENSG00000153914	0.115147	6.17837	0.545836	0.460024	0.571036
ENAH	ENSG00000154380	0.393851	5.49166	4.35239	0.0369571	0.0730561
CDK19	ENSG00000155111	0.921091	5.23603	25.4181	4.62e-07	2.68e-06
FAM126B	ENSG00000155744	-0.399158	4.49378	6.80791	0.00907547	0.0216002
SLC26A2	ENSG00000155850	0.356414	4.45828	2.61604	0.105788	0.176368
GNAQ	ENSG00000156052	0.270841	6.38377	2.98195	0.0841979	0.14586
TIAM1	ENSG00000156299	0.959012	3.48877	18.3163	1.87e-05	8.14e-05
UQCRB	ENSG00000156467	-0.255974	7.28345	2.63949	0.104237	0.174252
EIF4A2	ENSG00000156976	-0.14982	8.2785	1.26361	0.26097	0.36702
RNF111	ENSG00000157450	0.304034	5.01359	5.0491	0.0246387	0.0516411
APPL1	ENSG00000157500	-0.173895	5.36923	1.60837	0.20472	0.302258
SPPL3	ENSG00000157837	0.0836513	5.77458	0.409721	0.522111	0.629251
PTPDC1	ENSG00000158079	0.0579599	3.33257	0.131561	0.716819	0.795939
TPRG1L	ENSG00000158109	-1.09232	6.33244	65.6711	5.33e-16	1.04e-14
AUTS2	ENSG00000158321	0.0370745	5.68228	0.0346243	0.852385	0.89864
RAPGEF6	ENSG00000158987	0.596649	3.40888	13.358	0.000257327	0.000880552
MORC3	ENSG00000159256	0.616591	5.00076	24.3916	7.86e-07	4.37e-06
BTG2	ENSG00000159388	-0.681249	7.4728	5.41769	0.0199337	0.0429365
RSPRY1	ENSG00000159579	0.180223	5.21648	1.61397	0.203935	0.301291
GNE	ENSG00000159921	0.129037	5.06432	0.534701	0.464637	0.575528
ZBTB8A	ENSG00000160062	-0.327092	2.0887	3.18789	0.0741859	0.131195
PKNOX1	ENSG00000160199	0.0730434	4.05919	0.211171	0.645851	0.737563
ICOSLG	ENSG00000160223	-0.353446	1.52962	1.56308	0.211215	0.310048
FBXL13	ENSG00000161040	0.0732655	0.270057	0.0452892	0.831473	0.883674
ASRGL1	ENSG00000162174	-1.42885	4.50169	15.8814	6.74e-05	0.000261684
ELAVL4	ENSG00000162374	0.133542	-1.12873	0.0758006	0.783071	0.846688
ZYG11B	ENSG00000162378	-0.459341	5.46656	10.3429	0.00129975	0.003812
NFIA	ENSG00000162599	0.354806	5.74645	2.09022	0.148245	0.233573
FUBP1	ENSG00000162613	0.225651	6.16603	3.08621	0.0789584	0.138206
ZNF326	ENSG00000162664	-0.407372	4.62427	9.6957	0.001847	0.00523151
DDR2	ENSG00000162733	-0.319087	5.02562	1.43693	0.230636	0.332694
NCSTN	ENSG00000162736	0.218986	7.14713	2.55012	0.110286	0.182676
C1orf147	ENSG00000162888	0.473496	-1.33176	0.48876	0.484481	0.594385
SGCB	ENSG00000163069	0.14263	6.70269	0.594842	0.440553	0.553062
RPRD2	ENSG00000163125	-0.135093	5.94703	0.667423	0.413952	0.527439
TGFBR2	ENSG00000163513	-0.0968088	8.0895	0.280582	0.59632	0.694787
SERPINI1	ENSG00000163536	-0.503761	4.54976	7.34144	0.00673828	0.0165723
PPM1L	ENSG00000163590	-0.186585	4.70944	0.774151	0.378936	0.492917
PRICKLE2	ENSG00000163637	-0.848247	3.78305	21.7292	3.14e-06	1.58e-05
PTX3	ENSG00000163661	1.31528	1.24748	6.54146	0.0105389	0.0246356
SLMAP	ENSG00000163681	-0.755562	5.29576	24.7662	6.47e-07	3.65e-06
SNRK	ENSG00000163788	0.192789	5.94137	1.316	0.251311	0.356457
CCR1	ENSG00000163823	1.14232	4.87203	15.4958	8.27e-05	0.000315099
DTX3L	ENSG00000163840	1.26211	6.11446	71.5782	2.66e-17	6.06e-16
PBRM1	ENSG00000163939	-0.123296	4.99399	0.729776	0.392956	0.506956
PIGX	ENSG00000163964	0.0640564	4.42789	0.174285	0.676331	0.762313
BDH2	ENSG00000164039	-1.77301	5.91478	81.2608	1.98e-19	5.95e-18
PGRMC2	ENSG00000164040	0.231532	6.75704	2.30993	0.12855	0.207616
CDC25A	ENSG00000164045	-0.472448	0.855728	2.62593	0.105131	0.175519
HPGD	ENSG00000164120	-4.70637	4.43347	103.349	2.81e-24	1.47e-22
EDIL3	ENSG00000164176	2.45013	6.49863	29.402	5.88e-08	3.98e-07
ELOVL7	ENSG00000164181	0.486231	5.45708	2.03464	0.15375	0.240642
NIPBL	ENSG00000164190	0.0913764	5.9562	0.673889	0.411699	0.525181
PRRC1	ENSG00000164244	0.327501	6.0002	5.3836	0.0203269	0.043671
AGGF1	ENSG00000164252	0.0508526	4.1719	0.190197	0.662752	0.75177
GRPEL2	ENSG00000164284	0.415292	4.47313	9.07636	0.00258935	0.00705667
TLR3	ENSG00000164342	2.09919	5.94751	130.613	3.01e-30	3.23e-28
SFXN1	ENSG00000164466	-0.490807	6.20029	9.45725	0.00210317	0.00588116
STXBP5	ENSG00000164506	0.475067	3.85822	7.61722	0.00578135	0.0144689
TNFRSF11B	ENSG00000164761	-1.244	5.13397	14.7972	0.000119715	0.000441063
FZD6	ENSG00000164930	0.325396	5.11608	2.87421	0.0900092	0.154185
RASEF	ENSG00000165105	0.46337	4.12991	2.46637	0.116306	0.191227
HNRNPK	ENSG00000165119	-0.0366728	8.76074	0.094683	0.758306	0.828459
STRBP	ENSG00000165209	-0.97945	4.03049	25.1214	5.38e-07	3.08e-06
GAPVD1	ENSG00000165219	-0.0976365	5.49347	0.47198	0.492078	0.601732
ZNF367	ENSG00000165244	0.33346	2.65877	1.67405	0.195717	0.29153
OTUD1	ENSG00000165312	-0.464818	5.15404	8.424	0.00370299	0.00972156
GTF2A1	ENSG00000165417	-0.0935861	5.19245	0.35144	0.553299	0.657227
KBTBD6	ENSG00000165572	-0.805161	3.6858	30.528	3.29e-08	2.33e-07
MOAP1	ENSG00000165943	-0.417071	5.58307	6.95628	0.00835255	0.0200693
FRS2	ENSG00000166225	0.203624	4.52241	1.58391	0.208198	0.306513
ATMIN	ENSG00000166454	-0.055974	5.7811	0.175477	0.675289	0.761583
TMEM170A	ENSG00000166822	0.0279269	4.60995	0.0325462	0.856834	0.901607
BMI1	ENSG00000168283	0.22253	4.9413	1.56139	0.211461	0.310331
SEPT2	ENSG00000168385	-0.0939597	8.32928	0.498201	0.480291	0.590685
FILIP1L	ENSG00000168386	0.49022	5.62758	2.77585	0.095696	0.162081
TAP1	ENSG00000168394	2.17897	6.87903	167.646	2.42e-38	5.83e-36
SNRNP48	ENSG00000168566	0.078771	3.87968	0.314901	0.574688	0.676148
STAT3	ENSG00000168610	0.103601	7.66405	0.602458	0.437642	0.550331
IL12A	ENSG00000168811	0.937273	-0.778624	3.6076	0.0575162	0.106166
HNRNPH1	ENSG00000169045	0.115978	8.10045	0.608632	0.435303	0.547867
CXCL10	ENSG00000169245	3.11541	5.3241	108.153	2.49e-25	1.48e-23
B3GALNT1	ENSG00000169255	-0.227951	4.95092	2.36008	0.124476	0.20226
PTK2	ENSG00000169398	-0.0305369	6.74194	0.038785	0.843875	0.892268
PLEKHA2	ENSG00000169499	1.17753	6.39245	46.1072	1.12e-11	1.27e-10
PCBP1	ENSG00000169564	0.138593	6.95233	1.22414	0.26855	0.375434
HIC2	ENSG00000169635	0.167249	3.18677	0.837046	0.360243	0.473737
TOR1AIP2	ENSG00000169905	0.218092	5.66424	2.68698	0.101171	0.169888
MAP3K2	ENSG00000169967	0.326374	5.99229	5.62245	0.0177319	0.0388014
ZNF35	ENSG00000169981	-0.383326	2.10658	3.73134	0.0534006	0.0996736
USP47	ENSG00000170242	0.0314256	6.01608	0.0730833	0.786899	0.849597
FAXDC2	ENSG00000170271	-1.20968	4.89759	14.5454	0.000136819	0.000497793
PYM1	ENSG00000170473	0.131065	4.37959	0.811927	0.367551	0.481291
LONRF2	ENSG00000170500	-1.87807	2.7574	14.9785	0.000108741	0.000404858
SOCS6	ENSG00000170677	0.300921	4.83435	4.50237	0.0338479	0.0677309
FOXN2	ENSG00000170802	0.44928	4.28583	6.23375	0.0125338	0.0287071
PDGFD	ENSG00000170962	1.46573	5.8747	26.1178	3.21e-07	1.92e-06
PRKCE	ENSG00000171132	-1.47335	4.56691	42.6585	6.52e-11	6.68e-10
SOCS5	ENSG00000171150	0.278497	4.64521	4.98526	0.0255642	0.0533347
NETO2	ENSG00000171208	3.58707	5.47567	100.957	9.4e-24	4.61e-22
CLCN5	ENSG00000171365	-2.43382	6.68741	51.3202	7.85e-13	1.03e-11
ATF7IP	ENSG00000171681	0.675131	6.27892	25.7522	3.88e-07	2.28e-06
BCL2	ENSG00000171791	0.743267	6.14819	7.94267	0.00482826	0.0123101
PTEN	ENSG00000171862	0.168739	6.59284	1.73461	0.187824	0.282215
RPS7	ENSG00000171863	0.374669	8.77101	6.70096	0.00963611	0.0227597
ZNF217	ENSG00000171940	0.48341	5.56535	12.4291	0.000422693	0.00138239
SMN1	ENSG00000172062	0.179342	2.05481	0.938753	0.332599	0.444527
MALT1	ENSG00000172175	0.59756	5.67688	9.75901	0.00178446	0.00507672
CEBPB	ENSG00000172216	1.51105	6.27636	31.0327	2.54e-08	1.83e-07
CERS6	ENSG00000172292	0.159905	4.14294	1.02504	0.311326	0.421742
SPTLC3	ENSG00000172296	-0.45204	5.01498	2.65131	0.103465	0.173199
RASGRP1	ENSG00000172575	0.656977	4.42527	6.89288	0.00865396	0.0207012
PURG	ENSG00000172733	-0.504332	-0.824548	0.802904	0.370226	0.484144
NBEA	ENSG00000172915	0.0756143	4.2637	0.0664222	0.796619	0.857174
MYD88	ENSG00000172936	0.348512	5.67188	5.72963	0.016681	0.0367799
GXYLT2	ENSG00000172986	2.29126	2.70715	36.7977	1.31e-09	1.12e-08
RAPH1	ENSG00000173166	0.325182	2.16649	2.11071	0.146271	0.231076
OLR1	ENSG00000173391	1.32383	4.28419	14.3496	0.000151813	0.000547018
EIF1AX	ENSG00000173674	-0.149394	6.10352	1.04952	0.305618	0.41581
ADGRG2	ENSG00000173698	1.99313	1.89059	13.5253	0.000235366	0.000814132
KLHL15	ENSG00000174010	-0.416606	3.39455	6.8499	0.00886462	0.0211505
MGA	ENSG00000174197	-0.0591022	5.05266	0.179077	0.672167	0.758949
GK5	ENSG00000175066	-0.642728	3.89281	16.7365	4.29e-05	0.000173935
CKAP5	ENSG00000175216	0.271453	5.84618	4.51005	0.0336963	0.0674858
CCDC14	ENSG00000175455	0.0438631	5.45082	0.0371003	0.847261	0.894909
RAB6A	ENSG00000175582	0.350954	6.8361	8.96908	0.00274587	0.00743933
B3GNT5	ENSG00000176597	1.31291	3.86127	45.0128	1.96e-11	2.14e-10
BASP1	ENSG00000176788	1.16833	5.02611	7.91481	0.00490318	0.0124764
RPS6KA3	ENSG00000177189	0.191974	6.16632	1.53711	0.215049	0.314586
ZBTB38	ENSG00000177311	0.147919	6.63662	0.723683	0.394938	0.509015
TGIF1	ENSG00000177426	-0.13731	5.51778	1.06304	0.302523	0.412494
NR2C2	ENSG00000177463	-0.252914	5.10779	2.0588	0.151329	0.23744
TBL1XR1	ENSG00000177565	0.796241	7.07729	22.0818	2.61e-06	1.34e-05
CASC2	ENSG00000177640	-1.03264	1.82215	17.3937	3.04e-05	0.000126818
UBE2N	ENSG00000177889	-0.0345627	5.89726	0.0770521	0.781333	0.845321
LCORL	ENSG00000178177	-0.030409	3.28874	0.0329851	0.855883	0.901056
EPM2AIP1	ENSG00000178567	-0.691462	4.91436	25.0042	5.72e-07	3.26e-06
SUZ12	ENSG00000178691	0.0690359	5.0832	0.320396	0.57137	0.673099
GP5	ENSG00000178732	-0.418598	-1.08424	0.430201	0.51189	0.620322
APOLD1	ENSG00000178878	1.87735	7.14055	23.1056	1.53e-06	8.13e-06
SOCS4	ENSG00000180008	-0.532331	4.36763	12.8435	0.000338661	0.00112942
ZADH2	ENSG00000180011	-0.747298	5.15375	21.122	4.31e-06	2.12e-05
YOD1	ENSG00000180667	-0.597943	3.6393	12.8981	0.000328917	0.00109962
OXTR	ENSG00000180914	0.798493	1.62751	2.69646	0.100571	0.169044
LRRC57	ENSG00000180979	-0.171936	3.54784	1.60276	0.205513	0.303234
SETD2	ENSG00000181555	-0.777667	5.85059	44.9681	2e-11	2.19e-10
ZBTB20	ENSG00000181722	-0.244149	2.87382	0.480132	0.488362	0.598323
FIGN	ENSG00000182263	-0.740969	3.1768	6.30561	0.0120357	0.0276812
CEP97	ENSG00000182504	0.0316494	3.25748	0.0353668	0.850829	0.897597
SATB1	ENSG00000182568	-0.462482	4.736	3.57064	0.0588096	0.108183
CADM1	ENSG00000182985	-0.212778	5.21718	0.899105	0.343022	0.455357
PRR14L	ENSG00000183530	0.267942	5.11257	2.99661	0.0834392	0.144795
IRAK1	ENSG00000184216	0.586677	6.85313	15.4382	8.52e-05	0.000324116
DUSP8	ENSG00000184545	-0.752208	3.81361	5.39901	0.0201482	0.0433394
AP3M1	ENSG00000185009	0.163496	5.30722	1.71419	0.190443	0.285363
PURA	ENSG00000185129	-0.335816	5.71438	5.4701	0.0193445	0.0418399
PRPF39	ENSG00000185246	-0.0639803	4.70677	0.281888	0.595467	0.694177
SOCS1	ENSG00000185338	0.156854	3.27413	0.254775	0.613732	0.709895
MUC1	ENSG00000185499	-1.06352	6.47053	8.94945	0.00277554	0.00751062
SP1	ENSG00000185591	0.386702	6.92543	9.12994	0.00251461	0.00687199
PBX1	ENSG00000185630	-1.81686	5.70949	39.0396	4.15e-10	3.86e-09
NTF3	ENSG00000185652	-1.22514	1.11463	13.8475	0.000198258	0.000698502
ANKRD46	ENSG00000186106	-0.953772	4.59267	33.6433	6.62e-09	5.21e-08
LYRM7	ENSG00000186687	-0.10143	4.38884	0.376145	0.539674	0.645433
PPARA	ENSG00000186951	-1.22786	6.16787	21.2739	3.98e-06	1.97e-05
SESTD1	ENSG00000187231	-0.327081	5.27838	3.17985	0.0745518	0.131761
FNBP1	ENSG00000187239	0.500652	5.80635	9.59174	0.00195455	0.00550382
COL4A1	ENSG00000187498	2.19334	9.97408	59.5783	1.18e-14	1.92e-13
USP7	ENSG00000187555	0.0534083	6.44559	0.139294	0.708984	0.788827
SPRY4	ENSG00000187678	0.974449	6.66511	15.5037	8.23e-05	0.000313994
PTAR1	ENSG00000188647	-0.284166	5.85137	2.98914	0.0838248	0.145333
ZNF292	ENSG00000188994	0.797707	5.62132	26.7137	2.36e-07	1.44e-06
HMGB1	ENSG00000189403	0.158054	7.6318	1.77856	0.182326	0.276149
SPATS2L	ENSG00000196141	0.269917	7.2495	1.03013	0.310127	0.420386
FAM217B	ENSG00000196227	0.118539	3.78099	0.499788	0.479593	0.590014
TRAPPC2	ENSG00000196459	0.180176	3.71345	1.16354	0.280733	0.388597
WNK3	ENSG00000196632	-2.36085	1.42889	24.8732	6.12e-07	3.47e-06
CD47	ENSG00000196776	0.486972	6.27339	13.5066	0.000237725	0.000820941
ARHGEF12	ENSG00000196914	-0.224881	8.00971	1.37711	0.240594	0.344157
FAM3C	ENSG00000196937	0.0043363	5.43669	0.000479784	0.982525	0.988801
TRIM33	ENSG00000197323	-0.288099	5.37399	4.28844	0.0383724	0.0753958
PELI1	ENSG00000197329	0.699327	5.02889	16.3502	5.26e-05	0.000208815
IPP	ENSG00000197429	-0.123772	3.49037	0.496564	0.481014	0.591353
PIGN	ENSG00000197563	0.191075	4.45674	2.04798	0.152408	0.238865
TOPORS	ENSG00000197579	-0.539394	4.43998	17.1122	3.52e-05	0.000145401
ZNF460	ENSG00000197714	0.204967	0.605745	0.554925	0.456312	0.567615
SGTB	ENSG00000197860	0.807755	3.61472	22.2719	2.37e-06	1.22e-05
VPS13A	ENSG00000197969	-0.359431	6.09308	3.01957	0.0822653	0.143058
ZNF667	ENSG00000198046	-1.47012	2.12622	14.2976	0.000156064	0.000560766
SOWAHC	ENSG00000198142	-0.980351	4.88023	25.1616	5.27e-07	3.03e-06
ITSN2	ENSG00000198399	0.117999	5.95532	0.737623	0.390423	0.504403
ZNF587	ENSG00000198466	0.0150038	3.52168	0.00602206	0.938145	0.959372
MDM4	ENSG00000198625	0.126381	5.07832	0.588836	0.442869	0.555067
SLC9A6	ENSG00000198689	-0.00794919	4.29846	0.00440496	0.947083	0.965131
ECI2	ENSG00000198721	-1.65803	5.8546	106.824	4.87e-25	2.78e-23
SLC5A3	ENSG00000198743	-0.295763	6.68609	1.06294	0.302545	0.412494
DMD	ENSG00000198947	0.825597	4.37767	12.0793	0.000509837	0.00163643
COX20	ENSG00000203667	-0.450861	1.43519	4.40057	0.035927	0.0712571
SAMD5	ENSG00000203727	-1.19576	4.08328	14.6073	0.000132397	0.000483376
DAXX	ENSG00000204209	0.459727	5.42641	11.5877	0.000663897	0.00208553
BMPR2	ENSG00000204217	0.370192	6.77373	7.35528	0.00668662	0.0164628
COL5A2	ENSG00000204262	2.04774	6.88348	35.9094	2.07e-09	1.74e-08
ANKRD28	ENSG00000206560	-0.430954	5.10841	12.387	0.000432333	0.00141067
SACM1L	ENSG00000211456	-0.808223	5.43655	27.6781	1.43e-07	9.08e-07
TRIM59	ENSG00000213186	1.69927	2.44018	39.331	3.58e-10	3.34e-09
DDX3X	ENSG00000215301	0.0228007	8.2315	0.0278828	0.867385	0.909321
CCT6P1	ENSG00000228409	0.377729	1.74277	3.11742	0.0774592	0.136018
GAS5	ENSG00000234741	1.31204	6.93723	27.3789	1.67e-07	1.05e-06
RNF103	ENSG00000239305	-0.0862285	4.43643	0.381016	0.53706	0.642917
ZCCHC3	ENSG00000247315	0.117144	4.88637	0.694982	0.404475	0.518134
FDXACB1	ENSG00000255561	0.365013	0.643942	1.80481	0.179132	0.272147
GTF2I	ENSG00000263001	0.0100586	5.25515	0.00452576	0.946364	0.964735
DCP1A	ENSG00000272886	-0.0496398	4.50771	0.128514	0.719978	0.798336
TUBGCP5	ENSG00000275835	-0.0839402	3.91734	0.262371	0.608496	0.705036
PCGF2	ENSG00000277258	-1.00136	5.41481	42.962	5.58e-11	5.79e-10
MARCKS	ENSG00000277443	1.92028	7.62868	63.4275	1.66e-15	3.03e-14

## Sheet: miR224-5p_targets
Gene	ensembl_id	logFC	logCPM	LR	PValue	FDR
MYLIP	ENSG00000007944	-0.0802054	5.56422	0.197119	0.657057	0.747207
ZNF207	ENSG00000010244	0.216302	6.45515	2.99945	0.083293	0.144606
RABGAP1	ENSG00000011454	-0.29701	5.77679	4.65148	0.0310268	0.0629175
SLC7A14	ENSG00000013293	-3.52596	-1.76236	11.4779	0.000704283	0.00219927
CDH1	ENSG00000039068	-0.7562	6.42228	4.54109	0.0330905	0.0664449
PHLPP2	ENSG00000040199	-0.20379	3.74353	1.12642	0.288541	0.397338
RETSAT	ENSG00000042445	-0.909188	6.65104	20.2328	6.86e-06	3.25e-05
TPR	ENSG00000047410	0.451691	6.77932	10.1369	0.00145328	0.00420582
COASY	ENSG00000068120	-0.485004	6.14586	15.2017	9.66e-05	0.000363095
CDC42	ENSG00000070831	0.173181	0.374736	0.376062	0.539719	0.645433
FRYL	ENSG00000075539	0.68935	6.01071	26.2314	3.03e-07	1.82e-06
TPD52	ENSG00000076554	-0.511888	5.37959	7.85883	0.00505732	0.0128362
HSP90AA1	ENSG00000080824	-0.890272	9.30584	35.23	2.93e-09	2.41e-08
PHLPP1	ENSG00000081913	-0.78743	3.86106	10.5295	0.00117482	0.00348845
GSK3B	ENSG00000082701	-0.0598558	5.68245	0.195835	0.658104	0.748104
XPO1	ENSG00000082898	0.445909	6.79856	13.1064	0.000294285	0.000995478
GNA11	ENSG00000088256	-0.488564	6.14811	6.89226	0.00865697	0.0207063
PEBP1	ENSG00000089220	-1.64567	9.18903	67.8641	1.75e-16	3.61e-15
TNRC6A	ENSG00000090905	-0.0938487	5.99969	0.394672	0.529854	0.636429
HNRNPC	ENSG00000092199	0.0918285	8.23655	0.643894	0.422304	0.535699
DPYSL2	ENSG00000092964	0.765409	7.00919	12.1812	0.00048273	0.00155849
CD40	ENSG00000101017	1.58788	5.54071	55.408	9.79e-14	1.43e-12
ADNP2	ENSG00000101544	0.0510445	4.57822	0.102003	0.749439	0.821562
CSTF2	ENSG00000101811	-0.0102269	3.46005	0.00374721	0.951188	0.967888
RBM3	ENSG00000102317	0.967807	7.33474	51.9965	5.56e-13	7.44e-12
SEC14L5	ENSG00000103184	-0.4338	0.483327	1.21176	0.270984	0.378176
ABCC1	ENSG00000103222	1.39837	6.08716	65.3066	6.41e-16	1.23e-14
GGA2	ENSG00000103365	-0.3335	6.83808	4.42894	0.0353345	0.0702564
KDELR1	ENSG00000105438	0.162131	7.24407	1.44181	0.229846	0.331783
ADAP1	ENSG00000105963	-0.896266	2.88493	18.2931	1.89e-05	8.23e-05
SERPINE1	ENSG00000106366	3.53738	8.49601	34.6108	4.03e-09	3.25e-08
NUFIP2	ENSG00000108256	0.3117	6.41744	5.09252	0.0240293	0.0505285
PSMD3	ENSG00000108344	0.193146	6.5879	3.11537	0.077557	0.136169
MED13	ENSG00000108510	-0.0872857	6.00424	0.45176	0.5015	0.610126
CCND1	ENSG00000110092	1.99473	9.06348	47.9715	4.32e-12	5.15e-11
HIPK3	ENSG00000110422	-0.485351	6.81762	9.31121	0.00227756	0.00630378
C12orf49	ENSG00000111412	-0.386347	5.77577	4.5884	0.032189	0.064871
EYA4	ENSG00000112319	-4.36297	1.54465	48.9373	2.64e-12	3.24e-11
QKI	ENSG00000112531	0.571525	7.00378	15.6495	7.62e-05	0.000292916
ARSB	ENSG00000113273	-0.419788	5.6293	3.33406	0.0678592	0.121849
PDGFRB	ENSG00000113721	0.566576	7.78093	5.69131	0.0170491	0.0374666
GNB4	ENSG00000114450	1.42421	4.93689	57.5645	3.27e-14	5.03e-13
F3	ENSG00000117525	-1.90099	3.92661	20.3608	6.41e-06	3.06e-05
HOXB3	ENSG00000120093	-1.26618	4.50355	19.4946	1.01e-05	4.65e-05
GORAB	ENSG00000120370	0.62192	3.24502	10.0162	0.00155172	0.00446728
CXCR4	ENSG00000121966	3.08421	7.19809	106.86	4.78e-25	2.75e-23
ZWINT	ENSG00000122952	1.06354	3.58387	37.4676	9.29e-10	8.17e-09
RASSF8	ENSG00000123094	-1.43585	4.83804	63.2647	1.81e-15	3.28e-14
RAB9B	ENSG00000123570	1.62929	1.01831	21.362	3.8e-06	1.89e-05
SLC12A5	ENSG00000124140	1.79585	0.418666	10.8149	0.00100688	0.00303413
NCOA3	ENSG00000124151	0.214409	5.58153	2.2861	0.130537	0.210251
FOSB	ENSG00000125740	-1.29155	7.57692	4.63891	0.0312548	0.0633079
COX6B1	ENSG00000126267	-0.376894	6.73972	5.7711	0.0162919	0.0360624
MAP2K2	ENSG00000126934	-0.0810629	6.46119	0.470536	0.492741	0.602249
HOXD10	ENSG00000128710	-0.966198	3.65901	10.8879	0.000967958	0.00292675
CHAC1	ENSG00000128965	-0.710109	1.63945	1.83151	0.175949	0.268327
MPDU1	ENSG00000129255	-0.411526	5.83367	7.9157	0.00490077	0.0124741
KLK10	ENSG00000129451	1.54836	-0.70203	1.53008	0.216101	0.315679
SLC41A1	ENSG00000133065	-0.804436	6.06245	15.1329	0.000100203	0.000375304
KRAS	ENSG00000133703	0.118471	5.08849	0.666736	0.414192	0.527634
MBD2	ENSG00000134046	0.209187	6.09128	3.29133	0.0696466	0.124431
PRRG4	ENSG00000135378	-0.21023	4.88543	0.704465	0.401287	0.515035
RAC1	ENSG00000136238	0.315689	7.93821	5.57197	0.0182503	0.0398078
ASCC1	ENSG00000138303	0.523825	4.50003	15.1882	9.73e-05	0.000365243
TMTC3	ENSG00000139324	0.331714	5.05415	4.03659	0.0445238	0.0853333
SLC46A3	ENSG00000139508	-0.17569	5.0497	0.637435	0.424641	0.538045
RAB15	ENSG00000139998	-1.05131	3.92691	17.8154	2.43e-05	0.000103658
IGF1R	ENSG00000140443	-0.704394	6.63607	11.5316	0.000684232	0.00214243
GALNT1	ENSG00000141429	1.0111	5.90244	48.7527	2.9e-12	3.54e-11
SMAD4	ENSG00000141646	0.000284822	5.88505	3.57e-06	0.998493	0.999097
ITGB3BP	ENSG00000142856	0.298854	3.41238	2.27656	0.131343	0.211271
EFNA3	ENSG00000143590	2.48235	1.7073	57.4171	3.53e-14	5.41e-13
LHFPL2	ENSG00000145685	3.27598	5.85292	159.267	1.64e-36	3.41e-34
GIGYF1	ENSG00000146830	0.0865717	6.50823	0.442441	0.505946	0.614498
USP6NL	ENSG00000148429	-0.177746	4.13413	1.1672	0.279978	0.387736
EDNRA	ENSG00000151617	1.13681	4.79482	16.76	4.24e-05	0.000172
TIAL1	ENSG00000151923	0.215602	6.04631	4.16922	0.0411648	0.0799028
C21orf91	ENSG00000154642	-0.223126	3.65588	1.56866	0.210402	0.309151
NPTN	ENSG00000156642	-0.113062	6.78079	0.600114	0.438535	0.551125
CLDN12	ENSG00000157224	-0.278458	5.22512	2.99465	0.0835398	0.144915
NIT1	ENSG00000158793	-0.44884	5.40072	8.17184	0.00425457	0.0110025
AP2M1	ENSG00000161203	0.171621	8.27807	1.82757	0.176415	0.268884
B3GALNT2	ENSG00000162885	-0.129414	2.17312	0.263117	0.607987	0.704516
KBTBD8	ENSG00000163376	1.16024	1.47683	17.1274	3.5e-05	0.000144316
PTX3	ENSG00000163661	1.31528	1.24748	6.54146	0.0105389	0.0246356
MOCS2	ENSG00000164172	-0.876655	5.62865	34.0778	5.3e-09	4.23e-08
GRPEL2	ENSG00000164284	0.415292	4.47313	9.07636	0.00258935	0.00705667
CASP3	ENSG00000164305	0.952187	4.51615	32.0654	1.49e-08	1.11e-07
PIGO	ENSG00000165282	-0.466382	5.31345	15.376	8.81e-05	0.000333585
WRN	ENSG00000165392	0.577224	3.22749	9.58493	0.00196181	0.00552226
CASP7	ENSG00000165806	0.196527	4.82988	2.57634	0.108472	0.180084
API5	ENSG00000166181	-0.0480669	6.15176	0.163478	0.685975	0.769849
COQ7	ENSG00000167186	-0.138089	4.30949	0.809374	0.368305	0.482055
SERPINF2	ENSG00000167711	-1.22612	7.65339	6.58082	0.0103083	0.0241522
FAM84B	ENSG00000168672	-0.858842	6.18177	18.8343	1.43e-05	6.36e-05
FEM1B	ENSG00000169018	0.262585	5.85248	4.81432	0.0282241	0.0580011
HNRNPF	ENSG00000169813	0.0777709	7.22977	0.415787	0.519047	0.626666
LONRF2	ENSG00000170500	-1.87807	2.7574	14.9785	0.000108741	0.000404858
APLN	ENSG00000171388	2.36622	6.70342	51.034	9.08e-13	1.19e-11
ENC1	ENSG00000171617	0.810416	4.92642	9.09511	0.00256294	0.00699335
BCL2	ENSG00000171791	0.743267	6.14819	7.94267	0.00482826	0.0123101
STARD5	ENSG00000172345	0.68872	0.969296	4.50688	0.0337587	0.0675813
TCEAL1	ENSG00000172465	-0.0942645	3.78769	0.315548	0.574296	0.675752
TADA2B	ENSG00000173011	-0.197573	5.28116	1.57748	0.209124	0.30768
TRIB1	ENSG00000173334	-0.237944	5.83003	1.0117	0.314495	0.425376
TOMM20	ENSG00000173726	0.41221	7.69084	5.73672	0.0166138	0.0366467
IL20RB	ENSG00000174564	4.60473	4.41632	60.8994	6.01e-15	1.01e-13
AKIRIN1	ENSG00000174574	-0.646849	5.53007	23.1646	1.49e-06	7.9e-06
RPL15	ENSG00000174748	-0.185376	8.92877	1.84632	0.174212	0.266257
TOM1L2	ENSG00000175662	-1.175	6.09893	72.9705	1.32e-17	3.13e-16
ARL4D	ENSG00000175906	-2.62434	3.57534	45.9515	1.21e-11	1.37e-10
YES1	ENSG00000176105	-0.396215	5.73093	7.32213	0.00681106	0.0167247
ZNF135	ENSG00000176293	-1.13616	2.60626	13.7112	0.000213185	0.00074486
PAK2	ENSG00000180370	0.545392	6.57135	18.6492	1.57e-05	6.95e-05
KCTD2	ENSG00000180901	-0.191414	5.47322	2.04093	0.153116	0.239747
C17orf82	ENSG00000187013	1.40107	0.53297	8.19248	0.00420645	0.0108902
MITF	ENSG00000187098	-0.210102	5.31093	1.2819	0.257546	0.363209
ZNF573	ENSG00000189144	0.371686	1.00487	2.12173	0.145223	0.229686
PELI1	ENSG00000197329	0.699327	5.02889	16.3502	5.26e-05	0.000208815
ZKSCAN8	ENSG00000198315	0.241177	4.99651	2.77418	0.0957955	0.162213
NCOA6	ENSG00000198646	-0.0282452	5.65449	0.0703361	0.790848	0.852471
MTOR	ENSG00000198793	-0.622988	5.76533	13.1467	0.00028802	0.000976711
VGLL3	ENSG00000206538	-0.526335	2.34175	1.03759	0.308383	0.418637
DIO1	ENSG00000211452	-6.95424	5.3215	156.378	7e-36	1.35e-33
ZNF585B	ENSG00000245680	-0.0711823	3.94028	0.294424	0.587399	0.687297
TXNIP	ENSG00000265972	0.124249	9.82275	0.622761	0.430023	0.54311

## Sheet: miR155-5p_targets
Gene	ensembl_id	logFC	logCPM	LR	PValue	FDR
GCLC	ENSG00000001084	-0.579583	5.09074	12.262	0.000462279	0.0014981
CYP51A1	ENSG00000001630	-0.538211	1.43835	5.35512	0.0206615	0.0443036
TFPI	ENSG00000003436	0.0247356	6.98602	0.00260013	0.959332	0.973499
PLXND1	ENSG00000004399	1.64937	8.1473	73.2804	1.12e-17	2.7e-16
KDM1A	ENSG00000004487	-0.214218	5.63247	3.12856	0.0769316	0.135286
CIAPIN1	ENSG00000005194	-0.182543	5.16422	2.20877	0.137228	0.219077
GCFC2	ENSG00000005436	0.113376	4.06999	0.664325	0.415037	0.528391
MAP3K14	ENSG00000006062	1.01836	5.09847	21.9022	2.87e-06	1.46e-05
PNPLA4	ENSG00000006757	-1.08703	4.61546	28.1232	1.14e-07	7.33e-07
PRSS21	ENSG00000007038	0.931944	-1.34236	1.37011	0.241794	0.345603
SELE	ENSG00000007908	-0.768549	2.94709	3.92435	0.0475917	0.090294
E2F2	ENSG00000007968	3.46479	1.15469	76.5648	2.13e-18	5.6e-17
JARID2	ENSG00000008083	0.407106	4.2451	8.20451	0.00417865	0.0108344
SYPL1	ENSG00000008282	-0.260625	6.98284	2.54244	0.110824	0.183475
RPS20	ENSG00000008988	0.70097	9.20333	23.5499	1.22e-06	6.55e-06
FAM76A	ENSG00000009780	-0.290299	3.50006	3.23766	0.0719635	0.127978
ZNF207	ENSG00000010244	0.216302	6.45515	2.99945	0.083293	0.144606
NCAPD2	ENSG00000010292	0.509776	5.39034	18.623	1.59e-05	7.04e-05
HIVEP2	ENSG00000010818	0.223041	5.2759	1.85441	0.173271	0.265192
PLAUR	ENSG00000011422	2.5332	5.11227	59.9451	9.75e-15	1.61e-13
QPCTL	ENSG00000011478	0.737747	3.67953	14.4437	0.000144409	0.000522862
PPP5C	ENSG00000011485	-0.241302	5.49775	3.35178	0.0671324	0.120787
UFL1	ENSG00000014123	0.23444	5.5208	2.92665	0.0871279	0.150205
MATR3	ENSG00000015479	0.24437	1.74674	0.993277	0.318943	0.429623
SLC38A5	ENSG00000017483	2.36805	3.7364	16.5535	4.73e-05	0.000189888
NR1H3	ENSG00000025434	0.381005	5.45666	3.33009	0.068023	0.122077
TOMM34	ENSG00000025772	-0.488892	4.91265	11.1692	0.000831668	0.0025557
IFNGR1	ENSG00000027697	1.15087	6.46466	85.644	2.15e-20	7.3e-19
MAT2B	ENSG00000038274	-0.437102	6.57219	9.33012	0.00225418	0.00625178
TRIO	ENSG00000038382	0.622111	6.54939	13.9785	0.00018491	0.000654564
RAI14	ENSG00000039560	0.0414135	6.02244	0.0440186	0.833819	0.885111
RAB27B	ENSG00000041353	1.26444	1.86525	5.1859	0.0227708	0.0482635
RETSAT	ENSG00000042445	-0.909188	6.65104	20.2328	6.86e-06	3.25e-05
CTNNA1	ENSG00000044115	-0.122293	8.5778	0.894985	0.34413	0.456488
DSG2	ENSG00000046604	0.537634	6.94652	4.08219	0.0433376	0.0834535
GPM6B	ENSG00000046653	-2.29846	2.38295	60.8166	6.26e-15	1.06e-13
ATP6V1H	ENSG00000047249	-0.963797	5.64357	22.1799	2.48e-06	1.27e-05
RSF1	ENSG00000048649	0.0492107	5.4745	0.176158	0.674696	0.761099
FAM120A	ENSG00000048828	-0.158759	7.37854	1.51417	0.218504	0.318467
VAMP3	ENSG00000049245	0.209498	6.68294	2.63143	0.104767	0.175
PLEKHA5	ENSG00000052126	-0.543319	6.19046	4.44948	0.0349118	0.0695414
AKR7A2	ENSG00000053371	-1.0083	6.37667	18.7736	1.47e-05	6.55e-05
SYNE2	ENSG00000054654	-0.824977	7.66964	10.9656	0.000928207	0.002823
GALC	ENSG00000054983	0.273944	5.66986	2.6111	0.106118	0.176823
TAB2	ENSG00000055208	-0.104675	6.08554	0.736306	0.390847	0.504782
IL17RB	ENSG00000056736	-3.23798	5.75874	39.4661	3.34e-10	3.13e-09
RIOK2	ENSG00000058729	0.328533	4.09139	5.73532	0.016627	0.0366677
YBX3	ENSG00000060138	1.41537	7.7653	81.5824	1.68e-19	5.14e-18
WNK1	ENSG00000060237	-0.94087	7.64232	25.2214	5.11e-07	2.94e-06
BCAT1	ENSG00000060982	1.95274	4.75239	61.8752	3.66e-15	6.37e-14
NCKAP1	ENSG00000061676	-0.0924261	7.35263	0.276178	0.599217	0.697075
CS	ENSG00000062485	-0.0243405	7.02891	0.0197099	0.88835	0.923786
CTSA	ENSG00000064601	-0.842207	7.88746	27.0917	1.94e-07	1.2e-06
BTBD1	ENSG00000064726	0.196269	5.89304	2.18892	0.139007	0.221573
SLC9A3R2	ENSG00000065054	-0.54634	7.00101	5.26998	0.0216963	0.0462867
PKN2	ENSG00000065243	0.00694464	5.64941	0.00181612	0.966008	0.977541
MYLK	ENSG00000065534	-0.0920708	7.62324	0.292364	0.58871	0.688274
MTHFD2	ENSG00000065911	1.5432	4.28353	43.4889	4.26e-11	4.49e-10
NFYC	ENSG00000066136	-0.260345	5.55418	4.31143	0.0378571	0.0745109
SPI1	ENSG00000066336	2.52393	5.50038	114.561	9.82e-27	6.89e-25
LRRC40	ENSG00000066557	0.0625175	4.14383	0.123463	0.725309	0.802627
DDX3Y	ENSG00000067048	-0.0310706	5.18617	0.00581607	0.93921	0.959978
TRAM1	ENSG00000067167	0.696651	7.98774	17.9106	2.32e-05	9.89e-05
RHOA	ENSG00000067560	0.0407116	8.47959	0.0961434	0.756508	0.827197
CBFB	ENSG00000067955	1.01807	5.30596	42.8146	6.02e-11	6.21e-10
MEF2A	ENSG00000068305	0.531424	6.26743	13.838	0.000199262	0.000701293
INPP5A	ENSG00000068383	-0.257183	4.509	2.25951	0.132796	0.213192
PSME4	ENSG00000068878	0.0782438	5.52963	0.310919	0.577117	0.67842
NUCKS1	ENSG00000069275	0.0645748	7.91194	0.221098	0.638204	0.731163
RORA	ENSG00000069667	-0.0159282	5.54138	0.00637644	0.936354	0.95799
HDHD5	ENSG00000069998	0.136271	5.27139	0.729229	0.393133	0.507112
ASNS	ENSG00000070669	0.936981	-0.132298	5.25588	0.0218728	0.0466118
SEL1L	ENSG00000071537	0.325141	7.03614	3.90376	0.0481781	0.0912719
TRIP13	ENSG00000071539	1.5762	2.34694	25.1933	5.19e-07	2.98e-06
ALDH3A2	ENSG00000072210	-1.76558	7.49478	53.1344	3.11e-13	4.29e-12
MPP5	ENSG00000072415	-1.55136	5.50976	72.1314	2.01e-17	4.66e-16
SMARCE1	ENSG00000073584	-0.204464	3.17912	2.20347	0.1377	0.219724
PICALM	ENSG00000073921	-0.0458336	7.94977	0.0966836	0.755846	0.826747
MRPS34	ENSG00000074071	0.000293946	5.87994	4.78e-06	0.998255	0.998965
SLC25A40	ENSG00000075303	0.543489	4.16232	9.9613	0.00159865	0.00459268
FNDC3B	ENSG00000075420	1.0877	6.97942	26.5192	2.61e-07	1.58e-06
MLH1	ENSG00000076242	-0.239941	4.51614	4.93439	0.0263274	0.0547051
TPD52	ENSG00000076554	-0.511888	5.37959	7.85883	0.00505732	0.0128362
MBNL3	ENSG00000076770	-0.696231	4.26345	6.19663	0.0127994	0.0292161
STXBP2	ENSG00000076944	0.0450755	5.46471	0.12427	0.724448	0.801949
JADE1	ENSG00000077684	-0.588611	5.66203	11.2331	0.000803517	0.00247675
EDN1	ENSG00000078401	1.79893	5.45193	17.2895	3.21e-05	0.000133371
FDFT1	ENSG00000079459	-0.904097	5.7446	34.2724	4.79e-09	3.85e-08
KIF22	ENSG00000079616	-0.0188439	4.26043	0.014721	0.903429	0.934258
EPB41L2	ENSG00000079819	0.742592	6.39148	17.5135	2.85e-05	0.000119615
RIF1	ENSG00000080345	0.721027	5.70227	26.5484	2.57e-07	1.56e-06
PSEN1	ENSG00000080815	-0.322483	6.03152	5.14498	0.0233137	0.0492114
OSTM1	ENSG00000081087	0.202974	5.44527	2.17795	0.140001	0.22283
HSPB11	ENSG00000081870	0.319121	3.8563	4.33428	0.0373523	0.0736864
CCNT2	ENSG00000082258	0.198996	5.21454	1.28433	0.257096	0.362796
FAM135A	ENSG00000082269	0.0295805	4.12478	0.0311334	0.859943	0.903893
GEMIN5	ENSG00000082516	0.43415	4.60463	8.15019	0.00430566	0.0111113
GSK3B	ENSG00000082701	-0.0598558	5.68245	0.195835	0.658104	0.748104
ITGB5	ENSG00000082781	0.113378	7.41731	0.459345	0.49793	0.607122
XPO1	ENSG00000082898	0.445909	6.79856	13.1064	0.000294285	0.000995478
TNPO1	ENSG00000083312	0.0339692	6.57188	0.0690831	0.792676	0.853829
OXCT1	ENSG00000083720	-1.71271	5.07521	44.9238	2.05e-11	2.24e-10
HAL	ENSG00000084110	1.16932	-0.145267	8.17915	0.00423747	0.0109656
SCAMP1	ENSG00000085365	0.134015	5.66538	0.677827	0.410336	0.523932
WDFY1	ENSG00000085449	0.577939	5.86112	24.3675	7.96e-07	4.42e-06
MGST2	ENSG00000085871	-0.433508	5.27074	4.45253	0.0348495	0.0694471
B4GALT1	ENSG00000086062	-0.102802	7.31821	0.336804	0.56168	0.664569
RBM22	ENSG00000086589	0.480042	5.52999	14.6565	0.000128987	0.000472191
LAT2	ENSG00000086730	2.66385	4.06014	110.843	6.41e-26	4.1e-24
OGFOD1	ENSG00000087263	-0.102579	4.44941	0.47394	0.49118	0.60079
L2HGDH	ENSG00000087299	-1.99154	4.24014	71.3269	3.03e-17	6.83e-16
KLHL42	ENSG00000087448	-0.264648	4.63265	3.86386	0.0493368	0.0931623
GNAS	ENSG00000087460	0.204463	9.74859	1.19409	0.274507	0.381964
AURKA	ENSG00000087586	1.00804	2.66789	18.2129	1.98e-05	8.55e-05
C3orf18	ENSG00000088543	-1.12936	3.28306	19.9517	7.94e-06	3.72e-05
MAVS	ENSG00000088888	-0.19443	6.67546	2.76705	0.0962234	0.162795
PEBP1	ENSG00000089220	-1.64567	9.18903	67.8641	1.75e-16	3.61e-15
GANAB	ENSG00000089597	0.278828	8.58995	5.54975	0.0184833	0.0402214
RCOR1	ENSG00000089902	0.212469	4.88564	2.12562	0.144854	0.229236
PAPOLA	ENSG00000090060	-0.0349603	6.96065	0.0703811	0.790783	0.852471
ICAM1	ENSG00000090339	2.28001	6.60763	45.8597	1.27e-11	1.43e-10
PDPR	ENSG00000090857	-0.112724	5.65521	0.817977	0.365772	0.479321
GLG1	ENSG00000090863	-0.120805	7.91761	0.831525	0.361832	0.475206
PUS7	ENSG00000091127	1.04625	3.8959	22.8078	1.79e-06	9.39e-06
CDV3	ENSG00000091527	0.325738	7.03112	5.69326	0.0170302	0.0374429
PHGDH	ENSG00000092621	-3.18167	5.28121	90.4946	1.85e-21	7.09e-20
MSH2	ENSG00000095002	0.667003	4.38934	21.6867	3.21e-06	1.62e-05
CRAT	ENSG00000095321	-1.25282	6.33682	42.2696	7.95e-11	8.06e-10
BRPF3	ENSG00000096070	-0.862585	5.84821	30.4975	3.34e-08	2.36e-07
SIRT1	ENSG00000096717	0.148282	4.65158	1.11565	0.290857	0.399814
ACOT7	ENSG00000097021	-1.42521	6.02922	17.8022	2.45e-05	0.000104281
SCD	ENSG00000099194	3.00979	8.17753	83.5161	6.32e-20	2e-18
ERMP1	ENSG00000099219	-0.980776	5.69575	20.4179	6.22e-06	2.98e-05
BCL7C	ENSG00000099385	0.0107459	4.66864	0.003661	0.951752	0.968268
TIMM13	ENSG00000099800	-0.503295	5.41212	14.764	0.00012184	0.000447938
MTAP	ENSG00000099810	0.106929	4.53281	0.604344	0.436926	0.54958
SNAP29	ENSG00000099940	0.245064	4.98547	3.68785	0.0548101	0.10182
DDX17	ENSG00000100201	-0.198792	9.01084	1.83274	0.175804	0.268217
PACSIN2	ENSG00000100266	-0.387693	6.7091	5.52046	0.0187953	0.0408045
FKBP3	ENSG00000100442	-0.294309	4.456	4.3346	0.0373452	0.0736786
PYGL	ENSG00000100504	2.04568	5.7388	43.0101	5.45e-11	5.66e-10
GNPNAT1	ENSG00000100522	-0.207356	3.59637	0.627725	0.428191	0.541446
HIF1A	ENSG00000100644	-0.291852	6.97051	2.21647	0.136545	0.218152
CHD8	ENSG00000100888	0.0278404	5.8727	0.0499072	0.823225	0.877464
PFDN4	ENSG00000101132	0.359768	3.56248	3.15457	0.0757147	0.13347
EEF1A2	ENSG00000101210	2.04191	3.40176	6.01742	0.0141653	0.0319416
SAMHD1	ENSG00000101347	2.09333	6.7143	117.817	1.9e-27	1.45e-25
ANKRD12	ENSG00000101745	0.286845	5.6343	4.74678	0.0293532	0.0600019
CHRDL1	ENSG00000101938	-4.44446	3.82994	27.1113	1.92e-07	1.19e-06
STAG2	ENSG00000101972	0.126028	6.46747	0.902198	0.342193	0.454367
RP2	ENSG00000102218	0.838065	4.34112	30.6602	3.07e-08	2.18e-07
CAB39L	ENSG00000102547	-0.743043	3.72574	8.26017	0.00405244	0.0105422
STK24	ENSG00000102572	0.151585	5.60489	1.29596	0.254952	0.360451
FLT1	ENSG00000102755	1.70392	8.46377	31.0963	2.46e-08	1.77e-07
INTS6	ENSG00000102786	0.143555	4.75083	1.05303	0.304811	0.414932
NFAT5	ENSG00000102908	-0.0860411	5.44777	0.103741	0.747386	0.819944
LONP2	ENSG00000102910	-0.0690484	6.15852	0.229387	0.631979	0.725816
POLR2C	ENSG00000102978	-0.119789	6.13804	1.03463	0.309074	0.419354
HSDL1	ENSG00000103160	-0.154447	4.43031	1.42978	0.2318	0.334124
ZNF500	ENSG00000103199	0.080036	3.68301	0.336725	0.561726	0.664569
CLUAP1	ENSG00000103351	-0.0706673	4.20494	0.213743	0.643849	0.735967
MTFMT	ENSG00000103707	-0.187963	3.32779	1.27776	0.258317	0.364185
RPAP1	ENSG00000103932	0.214623	4.66445	3.27091	0.0705187	0.125785
TJP1	ENSG00000104067	-0.372925	6.3799	5.37035	0.0204819	0.0439674
EIF3J	ENSG00000104131	0.0451495	5.50945	0.126838	0.721733	0.799785
VPS18	ENSG00000104142	-0.264467	5.22123	4.04508	0.0443003	0.0849752
IMPAD1	ENSG00000104331	0.211477	6.5569	1.85348	0.173379	0.265304
RAB2A	ENSG00000104388	-0.183346	6.83958	2.19495	0.138464	0.220821
EIF3E	ENSG00000104408	0.475884	7.70437	11.6467	0.000643181	0.00202733
TRPS1	ENSG00000104447	-0.721916	4.27843	12.7894	0.000348581	0.00115933
CHRAC1	ENSG00000104472	0.13385	4.77035	0.688804	0.406572	0.520082
INTS10	ENSG00000104613	-0.190141	5.40793	2.45198	0.117377	0.192576
ERI1	ENSG00000104626	0.315419	3.64355	5.85931	0.0154949	0.034546
SLC39A14	ENSG00000104635	1.50427	7.79132	38.0545	6.88e-10	6.17e-09
TNFRSF10A	ENSG00000104689	0.755913	3.54687	11.3402	0.000758479	0.00235129
TRMT1	ENSG00000104907	0.337349	5.27017	6.78307	0.00920267	0.0218525
SLC1A5	ENSG00000105281	-0.495043	5.97178	4.52014	0.0334981	0.0671587
CDC37	ENSG00000105401	0.290212	7.26155	4.4044	0.0358463	0.0711458
ATP13A1	ENSG00000105726	0.00303469	6.15898	0.000686378	0.979099	0.986382
DNAJC2	ENSG00000105821	0.373967	4.34146	8.61884	0.00332704	0.00883731
BET1	ENSG00000105829	0.649882	4.66768	18.8022	1.45e-05	6.46e-05
NAMPT	ENSG00000105835	1.14164	6.95688	28.5383	9.19e-08	6.03e-07
HBP1	ENSG00000105856	0.0750829	5.58807	0.314629	0.574854	0.676309
PTN	ENSG00000105894	-2.31198	4.18724	27.327	1.72e-07	1.07e-06
PDAP1	ENSG00000106244	0.177175	6.49745	2.24672	0.133898	0.214738
BUD31	ENSG00000106245	0.305828	4.61761	4.99689	0.0253929	0.053006
ZKSCAN1	ENSG00000106261	-0.0234778	6.2469	0.0281497	0.866757	0.908828
PHF14	ENSG00000106443	0.45359	5.005	14.289	0.000156782	0.000563084
CEP41	ENSG00000106477	0.339254	3.14218	4.29694	0.038181	0.0750782
MEST	ENSG00000106484	-1.86828	4.23508	14.8307	0.000117604	0.000433978
RHEB	ENSG00000106615	0.146345	5.91706	1.00951	0.31502	0.425801
SPIN1	ENSG00000106723	-0.456093	6.67171	12.6138	0.000382917	0.00126319
TLE4	ENSG00000106829	-0.806342	3.60337	16.9481	3.84e-05	0.000157263
FUBP3	ENSG00000107164	-0.162936	5.58837	1.58806	0.207603	0.305754
TYRP1	ENSG00000107165	-7.2336	1.28367	119.777	7.08e-28	5.81e-26
RAB11FIP2	ENSG00000107560	-0.357546	4.76366	6.79894	0.00912122	0.0216868
EIF3A	ENSG00000107581	0.000690483	7.61935	3.17e-05	0.995506	0.996891
PALD1	ENSG00000107719	1.71766	5.06911	78.0365	1.01e-18	2.77e-17
SH3PXD2A	ENSG00000107957	0.872133	6.06849	19.4238	1.05e-05	4.81e-05
XPNPEP1	ENSG00000108039	0.448317	5.84971	9.28827	0.00230625	0.00636646
TFAM	ENSG00000108064	-0.311371	4.97685	5.0607	0.0244744	0.0513385
TSPAN14	ENSG00000108219	0.358992	6.98134	4.50006	0.0338937	0.067805
DHX40	ENSG00000108406	0.0574216	5.84378	0.142322	0.705984	0.786358
CDK5RAP3	ENSG00000108465	0.466898	3.87121	5.10191	0.0238996	0.0503098
CPD	ENSG00000108582	0.0971706	6.85823	0.277079	0.598622	0.696488
AKAP10	ENSG00000108599	0.221036	4.94345	3.45136	0.0631998	0.1148
SMARCD2	ENSG00000108604	0.189174	5.61641	3.18127	0.074487	0.131697
CCL2	ENSG00000108691	0.13932	6.36178	0.183884	0.668056	0.755782
RAB5C	ENSG00000108774	-0.651304	5.79223	31.2398	2.28e-08	1.66e-07
EZH1	ENSG00000108799	-0.3443	5.71886	6.71471	0.00956208	0.0226073
LRRC59	ENSG00000108829	0.329854	6.03298	4.75845	0.0291548	0.0596595
LUC7L3	ENSG00000108848	-0.264554	6.87751	2.54799	0.110435	0.18291
MPP2	ENSG00000108852	-1.53041	1.51939	20.2454	6.81e-06	3.23e-05
PRKAR1A	ENSG00000108946	-0.234932	7.8936	3.31924	0.0684733	0.122695
RAB34	ENSG00000109113	0.15731	5.85549	0.589541	0.442597	0.554905
TMEM33	ENSG00000109133	-0.296964	5.59676	2.20723	0.137365	0.21928
NFKB1	ENSG00000109320	0.526885	5.91801	17.6587	2.64e-05	0.000111569
UBE2D3	ENSG00000109332	0.121015	7.90173	0.865299	0.35226	0.465327
GRPEL1	ENSG00000109519	-0.57034	5.26456	13.2622	0.00027081	0.000922404
GAR1	ENSG00000109534	0.18342	3.60557	1.19538	0.274248	0.381695
FBXW7	ENSG00000109670	0.451902	4.18169	8.61541	0.00333331	0.00885136
RAPGEF2	ENSG00000109756	0.142344	6.27194	0.596313	0.439988	0.552622
KLHL5	ENSG00000109790	0.280416	5.01726	3.60016	0.0577742	0.106583
NCAPG	ENSG00000109805	3.5334	1.99049	95.1588	1.76e-22	7.47e-21
UGDH	ENSG00000109814	-0.0265997	5.67398	0.0185741	0.891595	0.926148
EHD1	ENSG00000110047	-0.614845	6.69556	18.6064	1.61e-05	7.09e-05
CPT1A	ENSG00000110090	-0.451303	7.05336	3.57533	0.0586437	0.107903
CCND1	ENSG00000110092	1.99473	9.06348	47.9715	4.32e-12	5.15e-11
EIF4G2	ENSG00000110321	0.118915	9.30843	0.654392	0.418547	0.531865
CBL	ENSG00000110395	0.779792	5.45033	29.9494	4.43e-08	3.06e-07
CARS	ENSG00000110619	0.624429	5.31192	27.0686	1.96e-07	1.22e-06
CD81	ENSG00000110651	0.760632	9.23398	15.1823	9.76e-05	0.000366263
SLC35F2	ENSG00000110660	-0.041355	4.08143	0.0285764	0.865761	0.908358
SOX6	ENSG00000110693	-1.75684	4.47109	58.3946	2.14e-14	3.39e-13
P3H3	ENSG00000110811	-0.0708888	3.94985	0.0300199	0.862445	0.905906
PPFIBP1	ENSG00000110841	0.168268	6.99607	0.359052	0.549033	0.653669
SLC11A2	ENSG00000110911	-0.00864762	5.69228	0.00408458	0.949041	0.966571
METAP2	ENSG00000111142	0.0811552	5.8834	0.490535	0.483689	0.593633
ARPC3	ENSG00000111229	0.460082	7.06995	13.7775	0.00020579	0.000721966
CDKN1B	ENSG00000111276	0.412844	6.01116	7.76348	0.00533131	0.0134608
NAA25	ENSG00000111300	0.620047	4.521	13.6491	0.000220347	0.00076757
GOLT1B	ENSG00000111711	0.595633	5.15754	16.3373	5.3e-05	0.00021014
MAPK14	ENSG00000112062	0.183523	5.92604	2.09911	0.147385	0.232505
MRPL18	ENSG00000112110	-0.193849	5.09921	2.08611	0.148644	0.234106
RAB23	ENSG00000112210	0.221644	2.86987	1.13481	0.286753	0.395416
ALDH5A1	ENSG00000112294	-1.29447	5.272	55.2689	1.05e-13	1.53e-12
PHACTR2	ENSG00000112419	0.432234	4.94268	6.05406	0.0138744	0.0313558
CUTA	ENSG00000112514	-0.233898	6.52532	3.48962	0.0617548	0.112524
EXOC2	ENSG00000112685	-0.088131	4.85644	0.503042	0.478167	0.588684
ERBIN	ENSG00000112851	-0.180599	6.50283	1.76831	0.183591	0.27752
HMGCS1	ENSG00000112972	-0.487297	5.01501	9.17847	0.00244879	0.0067143
MRPS27	ENSG00000113048	0.0108348	5.69706	0.00696387	0.933494	0.955908
ITK	ENSG00000113263	2.63518	3.09754	48.3686	3.53e-12	4.24e-11
CLINT1	ENSG00000113282	-0.450794	6.66081	8.48145	0.00358786	0.00945469
CNOT6	ENSG00000113300	0.0104844	5.13049	0.00703429	0.933159	0.95565
CDH6	ENSG00000113361	1.06533	7.59422	7.58846	0.0058743	0.0146687
GOLPH3	ENSG00000113384	-0.147553	6.33613	1.55761	0.212016	0.310928
RAD1	ENSG00000113456	0.0612864	4.07698	0.190317	0.662653	0.751762
NUP155	ENSG00000113569	0.619314	4.6182	25.4256	4.6e-07	2.67e-06
NR3C1	ENSG00000113580	0.800836	6.79376	18.9229	1.36e-05	6.11e-05
RARS	ENSG00000113643	0.407816	5.69995	7.93282	0.0048546	0.0123705
WWC1	ENSG00000113645	-1.0178	6.9472	19.5503	9.8e-06	4.53e-05
H2AFY	ENSG00000113648	0.561503	6.58523	18.6786	1.55e-05	6.85e-05
SMAD5	ENSG00000113658	0.243897	5.80006	2.69011	0.100973	0.169629
CSNK1A1	ENSG00000113712	0.643179	6.1097	21.1707	4.2e-06	2.07e-05
ERGIC1	ENSG00000113719	0.997126	8.17729	36.7817	1.32e-09	1.13e-08
CPEB4	ENSG00000113742	-0.982233	6.3567	26.23	3.03e-07	1.82e-06
DBN1	ENSG00000113758	-0.151716	5.99928	0.372316	0.541745	0.647254
BCL6	ENSG00000113916	1.44466	5.81334	46.7736	7.97e-12	9.26e-11
PCCB	ENSG00000114054	-1.94908	5.52104	80.6788	2.66e-19	7.83e-18
PDCD10	ENSG00000114209	0.0849043	4.63244	0.533632	0.465084	0.575962
WNT5A	ENSG00000114251	-0.170773	2.8034	0.233256	0.62912	0.723358
PRKAR2A	ENSG00000114302	-0.780677	5.44887	39.0132	4.21e-10	3.9e-09
GNB4	ENSG00000114450	1.42421	4.93689	57.5645	3.27e-14	5.03e-13
SPCS1	ENSG00000114902	-1.01112	5.86353	59.487	1.23e-14	2.01e-13
PPM1G	ENSG00000115241	0.0279265	6.27367	0.0633416	0.80129	0.860761
POLE4	ENSG00000115350	-0.100544	4.38311	0.343077	0.558058	0.661177
STAT1	ENSG00000115415	1.0041	7.99341	34.7669	3.72e-09	3.01e-08
KDM3A	ENSG00000115548	1.06915	6.2507	69.286	8.52e-17	1.83e-15
CNPPD1	ENSG00000115649	-0.381923	7.07125	4.47409	0.0344126	0.0687301
STRN	ENSG00000115808	0.0299988	5.02578	0.0415929	0.838398	0.888464
AAK1	ENSG00000115977	-0.477415	5.64896	9.95526	0.0016039	0.00460604
PCYOX1	ENSG00000116005	-1.15318	7.46765	37.0552	1.15e-09	9.95e-09
MSH6	ENSG00000116062	0.397371	5.20039	10.336	0.00130463	0.00382246
DHCR24	ENSG00000116133	0.148673	6.9274	0.787137	0.374967	0.48899
MECR	ENSG00000116353	-0.190859	3.99953	1.64248	0.199986	0.296559
EDEM3	ENSG00000116406	0.331565	5.50495	3.17271	0.0748779	0.132217
UAP1	ENSG00000117143	0.443074	5.16896	6.02201	0.0141286	0.0318735
SSX2IP	ENSG00000117155	-1.17226	4.67209	23.4627	1.27e-06	6.83e-06
DR1	ENSG00000117505	0.237601	5.7854	3.6896	0.0547527	0.101743
MARC2	ENSG00000117791	-1.98833	6.24701	86.3732	1.49e-20	5.13e-19
OSBPL9	ENSG00000117859	-0.29933	6.56465	5.81149	0.0159218	0.0353753
TXNDC12	ENSG00000117862	0.65287	3.07057	14.5927	0.000133431	0.00048669
CD3EAP	ENSG00000117877	0.637736	1.45994	5.89507	0.0151833	0.0339463
RCN2	ENSG00000117906	-0.242618	5.37534	3.81074	0.050925	0.0957396
KIF14	ENSG00000118193	3.99307	1.04847	85.5164	2.3e-20	7.76e-19
MYB	ENSG00000118513	3.2801	-0.460926	17.6011	2.72e-05	0.00011471
FOXO3	ENSG00000118689	0.332856	5.93702	5.01104	0.0251862	0.0526362
ARMC2	ENSG00000118690	-0.457329	1.61804	4.1731	0.0410706	0.0797714
PPL	ENSG00000118898	0.00202317	5.2665	6.3e-05	0.993666	0.995806
CCND2	ENSG00000118971	1.52492	5.41974	32.9559	9.43e-09	7.27e-08
KLF9	ENSG00000119138	-0.715491	6.60832	11.2929	0.000778054	0.00240595
RAD23B	ENSG00000119318	-0.122055	6.88137	0.914505	0.338922	0.451
RAB14	ENSG00000119396	-0.227199	6.653	3.33838	0.0676814	0.121592
TRIM32	ENSG00000119401	0.332715	3.86052	5.45365	0.0195275	0.0421976
VPS4B	ENSG00000119541	0.0805669	5.64262	0.297476	0.585469	0.68542
EIF2B2	ENSG00000119718	-0.301497	4.63575	5.94291	0.0147766	0.0331406
ATL2	ENSG00000119787	-0.370923	5.29675	3.60437	0.0576278	0.106349
GPAM	ENSG00000119927	-0.299153	3.62757	3.55183	0.0594797	0.109155
MXI1	ENSG00000119950	0.790626	6.38421	9.2605	0.0023415	0.00645068
WDR11	ENSG00000120008	-0.107685	6.11875	0.756221	0.384514	0.498576
GNA13	ENSG00000120063	0.781501	6.16477	43.6734	3.88e-11	4.1e-10
KANSL1	ENSG00000120071	0.145756	5.67439	1.66123	0.197437	0.293658
MASTL	ENSG00000120539	0.677211	3.4697	14.5368	0.000137451	0.000499779
PLS1	ENSG00000120756	-1.25047	4.93872	11.5943	0.000661537	0.00207868
APAF1	ENSG00000120868	0.927765	4.24609	28.8042	8.01e-08	5.3e-07
TSHZ3	ENSG00000121297	0.493748	3.31279	4.04857	0.0442087	0.0848503
RNF2	ENSG00000121481	0.488101	4.18882	8.61608	0.00333207	0.0088491
NAA50	ENSG00000121579	-0.30884	6.22521	3.58867	0.0581747	0.107228
CAT	ENSG00000121691	-1.40523	7.82707	29.0688	6.99e-08	4.67e-07
PIK3CA	ENSG00000121879	0.177084	4.69961	1.21122	0.271091	0.378234
LRIF1	ENSG00000121931	0.395339	3.19013	5.35895	0.0206161	0.0442186
UBL3	ENSG00000122042	-0.353806	5.94927	2.57579	0.10851	0.180134
ZNF644	ENSG00000122482	0.194982	4.95176	2.45457	0.117183	0.192352
GLIPR2	ENSG00000122694	1.45112	4.42151	27.4821	1.59e-07	9.97e-07
CLTA	ENSG00000122705	-0.346216	6.77537	4.37657	0.0364362	0.0721491
DCAF10	ENSG00000122741	-0.568858	4.99858	18.8438	1.42e-05	6.34e-05
TRIM24	ENSG00000122779	-0.162852	4.59894	1.16436	0.280562	0.388402
CDK2	ENSG00000123374	0.737902	4.03079	23.9374	9.95e-07	5.43e-06
ATPAF1	ENSG00000123472	-0.87016	6.04758	30.3025	3.7e-08	2.58e-07
FAM199X	ENSG00000123575	-0.13784	5.81917	0.548604	0.458889	0.570145
LPGAT1	ENSG00000123684	1.06545	6.25541	26.5884	2.52e-07	1.53e-06
SLC12A4	ENSG00000124067	0.690865	6.26618	23.8061	1.07e-06	5.78e-06
CSE1L	ENSG00000124207	0.195815	5.89895	2.79692	0.0944454	0.160279
MRS2	ENSG00000124532	-0.217901	4.87785	2.06405	0.150809	0.236791
RREB1	ENSG00000124782	-0.219035	5.74332	2.48614	0.114853	0.189119
DEK	ENSG00000124795	0.572423	6.41565	22.4825	2.12e-06	1.1e-05
EEF1E1	ENSG00000124802	-0.535947	2.73169	6.62326	0.0100655	0.023648
RUNX2	ENSG00000124813	1.75637	3.37494	36.0109	1.96e-09	1.65e-08
ABCC4	ENSG00000125257	0.0517693	6.09246	0.0302231	0.861985	0.90552
SLC25A19	ENSG00000125454	0.799661	2.84302	15.2651	9.34e-05	0.000351966
TTF1	ENSG00000125482	0.343633	3.53841	5.29341	0.0214063	0.0457102
POLR1B	ENSG00000125630	-0.040753	4.55073	0.0717745	0.78877	0.850915
MCM8	ENSG00000125885	-0.141318	3.15833	0.688392	0.406712	0.520194
RBM42	ENSG00000126254	-0.17313	5.87928	1.91993	0.165864	0.256106
UBA2	ENSG00000126261	0.538673	6.25099	24.385	7.89e-07	4.38e-06
ZNF384	ENSG00000126746	0.23413	4.72303	2.65938	0.102941	0.172422
TIMM8A	ENSG00000126953	-0.156124	2.44962	0.494431	0.481957	0.592069
RAP1B	ENSG00000127314	0.374299	5.95976	6.49325	0.0108285	0.0252534
RAB3IP	ENSG00000127328	-0.63243	5.79047	5.07516	0.024271	0.0509582
UBR4	ENSG00000127481	-0.334549	7.45541	2.76604	0.0962841	0.162862
SMARCA4	ENSG00000127616	-0.278946	6.60801	4.58109	0.0323267	0.0651046
FGL2	ENSG00000127951	-0.0601233	6.55325	0.0766417	0.781901	0.845739
ZFP36	ENSG00000128016	-0.0988431	8.60351	0.0798165	0.777546	0.842563
SPECC1	ENSG00000128487	0.859712	4.30565	15.6731	7.53e-05	0.000289422
DOCK4	ENSG00000128512	1.06111	5.52789	35.7016	2.3e-09	1.92e-08
PODXL	ENSG00000128567	-1.63463	8.40315	38.3742	5.84e-10	5.3e-09
MKLN1	ENSG00000128585	-0.0828306	5.35392	0.211066	0.645933	0.737563
CALU	ENSG00000128595	1.51241	7.34409	74.3669	6.49e-18	1.62e-16
TWSG1	ENSG00000128791	-0.489051	5.49226	9.10035	0.00255561	0.00697499
ALDH1A2	ENSG00000128918	-3.18325	4.06617	31.1849	2.35e-08	1.7e-07
PALLD	ENSG00000129116	-0.7119	6.6258	8.20178	0.00418493	0.0108479
SERGEF	ENSG00000129158	0.0868739	3.70622	0.221104	0.6382	0.731163
CD68	ENSG00000129226	3.08071	-1.55078	20.1662	7.1e-06	3.36e-05
SNX6	ENSG00000129515	0.444479	5.93517	11.7978	0.000593	0.00188222
GNL3L	ENSG00000130119	0.169899	3.03438	0.531555	0.465954	0.576881
SH3BP4	ENSG00000130147	-0.124558	6.06609	0.242463	0.622433	0.717564
MOSPD2	ENSG00000130150	0.452566	4.25427	9.92892	0.00162702	0.00466568
NSUN5	ENSG00000130305	0.252275	4.3344	2.90898	0.0880876	0.151488
COLGALT1	ENSG00000130309	1.91025	7.10728	138.283	6.32e-32	7.87e-30
ZSWIM6	ENSG00000130449	0.184798	4.32376	1.39551	0.237477	0.340588
ATXN10	ENSG00000130638	0.00789299	6.07913	0.00373923	0.95124	0.967888
EXOSC2	ENSG00000130713	0.424621	4.18595	9.80323	0.00174205	0.00497012
MAP3K10	ENSG00000130758	-0.355935	4.35446	6.27812	0.0122238	0.0280693
EIF3G	ENSG00000130811	0.0163223	6.54658	0.0156068	0.900581	0.932188
DNMT1	ENSG00000130816	0.971599	5.57427	46.797	7.87e-12	9.16e-11
ZNF236	ENSG00000130856	-0.0131471	3.74456	0.0053602	0.941636	0.96144
KIF3A	ENSG00000131437	-0.0163399	4.07985	0.0131229	0.908798	0.938085
PSME3	ENSG00000131467	-0.22075	6.13865	2.91135	0.0879585	0.151311
UBE2D2	ENSG00000131508	0.599223	6.56731	18.5044	1.7e-05	7.44e-05
IL13RA1	ENSG00000131724	0.640088	6.65566	20.883	4.88e-06	2.38e-05
DNAJB1	ENSG00000132002	-0.337261	6.83451	5.71338	0.0168361	0.0370654
HSD17B7	ENSG00000132196	0.8655	3.78466	8.56388	0.00342899	0.0090846
ARFIP2	ENSG00000132254	-0.319745	5.46423	9.77695	0.00176713	0.00503424
UBE2G1	ENSG00000132388	-0.335564	5.21633	6.96856	0.0082954	0.0199465
TBC1D14	ENSG00000132405	-0.541305	5.36953	3.81488	0.0507992	0.0955419
JCHAIN	ENSG00000132465	1.10551	6.69059	2.70645	0.0999433	0.168167
ITGB4	ENSG00000132470	1.23633	5.80681	24.7608	6.49e-07	3.66e-06
NES	ENSG00000132688	-1.04127	6.72164	19.4005	1.06e-05	4.86e-05
NASP	ENSG00000132780	0.404218	6.11701	10.0473	0.00152569	0.00439779
CTNNBL1	ENSG00000132792	0.123172	5.29932	0.82446	0.363879	0.477353
PATJ	ENSG00000132849	-1.07955	6.6383	22.3234	2.3e-06	1.19e-05
TBC1D8B	ENSG00000133138	0.0859864	4.45011	0.208847	0.647672	0.739003
CSNK1G2	ENSG00000133275	0.0190793	6.0816	0.031246	0.859693	0.90373
CNDP2	ENSG00000133313	0.120934	9.61279	0.24252	0.622392	0.717564
RTN3	ENSG00000133318	-0.025915	7.08384	0.0264019	0.870923	0.911996
KRAS	ENSG00000133703	0.118471	5.08849	0.666736	0.414192	0.527634
IPO8	ENSG00000133704	-0.243461	5.79774	4.7525	0.0292558	0.0598441
LARS	ENSG00000133706	0.332918	6.58352	5.69903	0.0169743	0.0373447
SARAF	ENSG00000133872	0.491651	8.47714	7.75233	0.00536434	0.0135295
IER3IP1	ENSG00000134049	-0.500038	5.00233	8.72401	0.00314046	0.00839102
VHL	ENSG00000134086	-0.281554	4.51297	4.59995	0.0319729	0.0644861
ARL8B	ENSG00000134108	-0.553593	6.04879	21.8079	3.01e-06	1.53e-05
NOTCH2	ENSG00000134250	0.806571	6.9804	15.6835	7.49e-05	0.000287939
CDC73	ENSG00000134371	0.338904	5.37594	6.26221	0.012334	0.0282999
NARS	ENSG00000134440	-0.364318	7.18558	3.55123	0.0595013	0.109186
DDB2	ENSG00000134574	1.91946	5.387	165.222	8.18e-38	1.89e-35
YARS	ENSG00000134684	0.533981	5.7666	21.302	3.92e-06	1.94e-05
PHC2	ENSG00000134686	0.505534	7.28383	10.342	0.00130036	0.00381285
AGO4	ENSG00000134698	0.643839	4.67021	19.4136	1.05e-05	4.83e-05
COL4A2	ENSG00000134871	1.72048	9.90733	46.2744	1.03e-11	1.17e-10
ARGLU1	ENSG00000134884	0.122882	6.79847	0.380435	0.537371	0.643141
TPP2	ENSG00000134900	0.332328	5.46818	7.59948	0.00583851	0.0145871
KDELC1	ENSG00000134901	1.19153	3.78271	17.0095	3.72e-05	0.000152719
CARS2	ENSG00000134905	0.267234	5.64489	3.18987	0.0740957	0.131085
ETS1	ENSG00000134954	1.01659	7.69822	29.9991	4.32e-08	2.99e-07
APC	ENSG00000134982	0.126409	5.13556	0.732283	0.392144	0.505977
UBQLN1	ENSG00000135018	-0.338508	6.69272	6.67236	0.00979192	0.02308
PSAT1	ENSG00000135069	-3.41859	5.9205	60.0764	9.12e-15	1.51e-13
DMTF1	ENSG00000135164	0.221494	5.84678	1.67293	0.195866	0.291695
CD36	ENSG00000135218	2.93571	6.81841	76.6977	1.99e-18	5.27e-17
PNPLA8	ENSG00000135241	-0.39449	5.11557	5.87319	0.0153731	0.034311
SRPK2	ENSG00000135250	0.206988	4.80356	2.39724	0.121549	0.198312
NT5E	ENSG00000135318	-0.563974	5.50247	8.02858	0.00460449	0.0117994
CDK4	ENSG00000135446	0.158503	5.20795	1.91825	0.16605	0.256359
TFCP2	ENSG00000135457	0.0511678	5.00625	0.170374	0.67978	0.765084
COG2	ENSG00000135775	-0.331055	4.76286	5.77837	0.0162246	0.0359377
TAF5L	ENSG00000135801	0.294085	4.2611	4.72436	0.0297382	0.0606498
EIF4E2	ENSG00000135930	-0.536319	5.78129	13.7422	0.000209688	0.000734082
CAB39	ENSG00000135932	-0.424499	6.4141	6.17862	0.0129303	0.0294724
REV1	ENSG00000135945	-0.00603433	4.9502	0.00167176	0.967386	0.978384
FLNB	ENSG00000136068	-0.348492	7.9569	6.22433	0.0126007	0.0288289
VPS36	ENSG00000136100	-0.0859168	5.66547	0.361393	0.547734	0.652457
RAC1	ENSG00000136238	0.315689	7.93821	5.57197	0.0182503	0.0398078
NUPL2	ENSG00000136243	0.0308856	3.35122	0.0436009	0.834598	0.885572
IL6	ENSG00000136244	2.34503	4.02685	13.2097	0.000278503	0.000947075
TM6SF1	ENSG00000136404	2.11518	2.06622	62.0218	3.4e-15	5.94e-14
SRSF1	ENSG00000136450	-0.069507	4.99826	0.329442	0.565988	0.668119
VEZF1	ENSG00000136451	0.0508929	5.81273	0.168916	0.681077	0.76617
DCAF7	ENSG00000136485	-0.331817	6.72336	7.20191	0.00728259	0.0177657
EPRS	ENSG00000136628	0.540053	6.80755	12.2188	0.000473108	0.00153063
KCTD3	ENSG00000136636	0.700167	6.48051	15.5485	8.04e-05	0.000307299
MYC	ENSG00000136997	2.07437	6.34412	41.7199	1.05e-10	1.05e-09
RAB30	ENSG00000137502	0.362466	3.65949	3.52283	0.0605291	0.110704
SDCBP	ENSG00000137575	0.728622	7.51345	21.1972	4.14e-06	2.04e-05
THBS1	ENSG00000137801	-0.186299	8.58492	0.297646	0.585362	0.685398
ADAM10	ENSG00000137845	0.627507	6.93346	26.0045	3.41e-07	2.02e-06
PNPT1	ENSG00000138035	-0.299018	4.56255	3.03104	0.0816858	0.142232
ACTR2	ENSG00000138071	0.571847	7.77798	20.4431	6.14e-06	2.94e-05
CEP55	ENSG00000138180	4.66557	2.49694	90.9081	1.5e-21	5.81e-20
ENTPD1	ENSG00000138185	1.45719	5.56484	84.1704	4.54e-20	1.47e-18
FASTKD1	ENSG00000138399	-0.150031	3.99827	0.575522	0.448073	0.560194
ABI2	ENSG00000138443	-0.389792	5.71409	9.71451	0.00182819	0.00518458
USP8	ENSG00000138592	-0.0153301	5.64849	0.0121722	0.912149	0.940803
TMOD3	ENSG00000138594	0.283958	6.01107	4.13364	0.0420388	0.0813517
FGF2	ENSG00000138685	0.608685	3.8142	3.09777	0.0783996	0.137336
SEPT11	ENSG00000138758	-0.0340108	7.11713	0.0511197	0.821126	0.875934
SEC24B	ENSG00000138802	0.218408	5.46362	3.29592	0.0694524	0.124142
GABARAPL1	ENSG00000139112	-1.93875	7.03202	102.198	5.02e-24	2.57e-22
AMIGO2	ENSG00000139211	-0.0301345	4.02242	0.00966702	0.921677	0.947747
GLIPR1	ENSG00000139278	2.02062	4.70393	65.3448	6.29e-16	1.21e-14
TMTC3	ENSG00000139324	0.331714	5.05415	4.03659	0.0445238	0.0853333
SLC7A1	ENSG00000139514	1.17545	5.59379	53.5593	2.51e-13	3.49e-12
LNX2	ENSG00000139517	0.0593366	4.32511	0.0736738	0.786061	0.849009
C12orf10	ENSG00000139637	-0.256738	5.02567	4.18641	0.0407493	0.0792137
TMBIM6	ENSG00000139644	-0.878693	10.2886	20.9066	4.82e-06	2.35e-05
DIAPH3	ENSG00000139734	0.74795	2.10905	3.94819	0.0469219	0.0891912
NOVA1	ENSG00000139910	-0.817089	3.16336	3.45261	0.063152	0.11474
TCF12	ENSG00000140262	0.381364	6.10787	4.62014	0.0315986	0.0638813
SLC27A2	ENSG00000140284	-3.5353	6.25455	63.7884	1.39e-15	2.56e-14
FGF7	ENSG00000140285	-2.15712	2.36023	12.6692	0.000371723	0.00122959
TSPAN3	ENSG00000140391	-0.498048	7.49916	13.0523	0.000302917	0.0010208
CYP1A1	ENSG00000140465	-3.29744	-1.73892	11.7925	0.000594686	0.00188732
DET1	ENSG00000140543	-0.216842	0.285042	0.303365	0.58178	0.682307
CDH13	ENSG00000140945	2.24151	6.07243	63.8211	1.36e-15	2.52e-14
COPS3	ENSG00000141030	0.0786326	4.92967	0.441643	0.506331	0.614839
NOB1	ENSG00000141101	0.367251	4.64134	7.73685	0.00541052	0.0136251
C17orf80	ENSG00000141219	0.0567054	4.2795	0.174915	0.67578	0.761971
SSH2	ENSG00000141298	0.225331	5.34995	1.86235	0.172354	0.264067
CLTC	ENSG00000141367	-0.180174	8.50861	2.06603	0.150613	0.236531
RPRD1A	ENSG00000141425	-0.0771436	5.45526	0.29447	0.58737	0.687297
RPTOR	ENSG00000141564	0.193144	5.10835	2.15427	0.142174	0.225696
SMAD4	ENSG00000141646	0.000284822	5.88505	3.57e-06	0.998493	0.999097
AKT1	ENSG00000142208	0.181729	6.57924	1.29385	0.255339	0.360865
ALDH9A1	ENSG00000143149	-1.15721	6.84295	32.3975	1.26e-08	9.48e-08
XPR1	ENSG00000143324	-0.269049	5.85282	1.81329	0.178114	0.270903
RGL1	ENSG00000143344	-0.171492	6.48718	0.262461	0.608434	0.705
INTS7	ENSG00000143493	0.674831	3.73006	17.6022	2.72e-05	0.000114661
HAX1	ENSG00000143575	0.130234	6.02101	0.938065	0.332776	0.444687
KCNN3	ENSG00000143603	1.24358	4.6219	26.1665	3.13e-07	1.88e-06
DEGS1	ENSG00000143753	1.34694	6.99932	24.6107	7.02e-07	3.93e-06
ETNK2	ENSG00000143845	-3.36017	5.34988	101.327	7.8e-24	3.88e-22
MEIS1	ENSG00000143995	-0.601997	3.85539	6.21468	0.0126695	0.0289607
CIAO1	ENSG00000144021	-0.255696	6.2663	4.14163	0.0418409	0.0810026
TPRKB	ENSG00000144034	0.133791	4.01806	0.697569	0.403602	0.517216
LNPK	ENSG00000144320	1.07018	5.28834	54.2395	1.77e-13	2.52e-12
CNOT9	ENSG00000144580	0.52798	5.13419	20.7104	5.34e-06	2.59e-05
GMPPA	ENSG00000144591	0.397893	5.44335	6.44742	0.0111113	0.0258298
OSBPL10	ENSG00000144645	-0.131931	5.13035	0.565174	0.452183	0.56378
UBA3	ENSG00000144744	-0.160786	4.95147	1.38525	0.23921	0.342522
ARL6IP5	ENSG00000144746	0.758968	7.2397	25.7218	3.94e-07	2.32e-06
ATG3	ENSG00000144848	-0.0578842	5.34997	0.202141	0.652998	0.743695
AGTR1	ENSG00000144891	-1.67111	3.99414	18.0406	2.16e-05	9.29e-05
EIF2B5	ENSG00000145191	-0.0186427	5.62959	0.0268174	0.86992	0.911401
FIP1L1	ENSG00000145216	0.0653528	3.67113	0.217055	0.641293	0.733821
CISD2	ENSG00000145354	0.443481	5.06983	5.15859	0.0231316	0.048894
CBR4	ENSG00000145439	-1.11508	4.82906	52.9152	3.48e-13	4.78e-12
MYO10	ENSG00000145555	-0.462089	5.91418	5.44294	0.0196476	0.0424124
PIK3R1	ENSG00000145675	0.184704	6.36419	0.807825	0.368764	0.482531
ZNF300	ENSG00000145908	0.0878647	2.93633	0.109443	0.740779	0.814923
TPBG	ENSG00000146242	0.890968	4.16487	16.4578	4.97e-05	0.00019859
MMS22L	ENSG00000146263	1.085	2.91478	21.4078	3.71e-06	1.85e-05
RBAK	ENSG00000146587	0.630803	4.3508	20.1678	7.09e-06	3.35e-05
EGFR	ENSG00000146648	1.94527	7.88146	136.048	1.95e-31	2.34e-29
LUC7L2	ENSG00000146963	0.0750846	4.88481	0.447063	0.503733	0.612456
DOK2	ENSG00000147443	1.87753	3.90781	59.8521	1.02e-14	1.68e-13
NSD3	ENSG00000147548	0.126588	5.80829	1.25857	0.261921	0.367967
TERF1	ENSG00000147601	-0.248571	4.76138	4.22849	0.0397508	0.0776639
CDKN2A	ENSG00000147889	4.80295	3.29737	95.8658	1.23e-22	5.37e-21
POLE3	ENSG00000148229	0.705868	5.29995	33.6418	6.63e-09	5.21e-08
ASB6	ENSG00000148331	-0.516917	4.60357	11.7035	0.000623826	0.00197196
PAXX	ENSG00000148362	-0.0609231	4.83698	0.129341	0.719117	0.797648
HERC4	ENSG00000148634	-0.227839	5.19142	4.48992	0.0340953	0.068167
ADD3	ENSG00000148700	-0.935145	7.10902	24.3744	7.93e-07	4.4e-06
LIN7C	ENSG00000148943	-0.194144	4.67804	1.33238	0.248382	0.353149
HSD17B12	ENSG00000149084	-0.67393	5.33947	13.0671	0.000300531	0.0010138
TNKS1BP1	ENSG00000149115	0.723571	6.82556	19.1316	1.22e-05	5.54e-05
PTPRJ	ENSG00000149177	-0.203471	6.19093	1.45179	0.228241	0.329913
CCDC82	ENSG00000149231	0.30747	5.04892	5.09748	0.0239606	0.0503977
INTS4	ENSG00000149262	0.302643	4.32418	5.52323	0.0187656	0.0407514
FADS1	ENSG00000149485	0.95577	4.84341	30.8055	2.85e-08	2.04e-07
DCUN1D2	ENSG00000150401	-0.468876	3.28547	6.74637	0.00939384	0.0222618
MIA2	ENSG00000150527	-1.20216	6.48988	32.6099	1.13e-08	8.56e-08
PDCD4	ENSG00000150593	0.546687	5.69867	17.5293	2.83e-05	0.000118689
DOCK1	ENSG00000150760	-0.179853	6.2154	1.91793	0.166085	0.256395
SLC7A11	ENSG00000151012	3.87617	2.37529	121.828	2.52e-28	2.21e-26
THRB	ENSG00000151090	-2.06086	3.78996	52.7162	3.85e-13	5.24e-12
TWF1	ENSG00000151239	0.166701	5.68149	0.859269	0.353943	0.466911
FAM177A1	ENSG00000151327	-0.656388	5.46966	20.4789	6.03e-06	2.9e-05
UPF2	ENSG00000151461	0.159271	5.13332	1.79536	0.180274	0.273596
FLI1	ENSG00000151702	1.46526	5.45616	50.5704	1.15e-12	1.47e-11
PDK1	ENSG00000152256	3.01354	5.62817	268.373	2.57e-60	5.4e-57
TMEM123	ENSG00000152558	0.935714	7.83192	28.6536	8.66e-08	5.7e-07
IFIT5	ENSG00000152778	0.541415	4.90661	15.5321	8.11e-05	0.000309722
CARHSP1	ENSG00000153048	0.419779	5.92097	4.20715	0.0402539	0.0784428
MSI2	ENSG00000153944	-0.754271	6.17759	13.0177	0.000308554	0.00103708
OTULIN	ENSG00000154124	0.581611	4.77222	12.9895	0.000313236	0.0010516
TBRG1	ENSG00000154144	-0.0948671	4.74543	0.456371	0.499325	0.608448
OBSCN	ENSG00000154358	0.446787	6.2132	5.22694	0.0222397	0.0472979
XPC	ENSG00000154767	-0.769249	4.95262	24.2239	8.58e-07	4.74e-06
OXNAD1	ENSG00000154814	-1.18464	3.30554	28.4344	9.69e-08	6.33e-07
CYP2U1	ENSG00000155016	-0.123632	3.68124	0.637624	0.424573	0.537987
ATP6V1C1	ENSG00000155097	-0.439399	6.36391	6.32697	0.0118915	0.0273987
MARVELD1	ENSG00000155254	1.54059	5.3901	23.1889	1.47e-06	7.81e-06
MOV10	ENSG00000155363	-0.182783	5.98075	1.21996	0.269368	0.376465
RRAGA	ENSG00000155876	0.045056	6.55115	0.0816482	0.775076	0.840555
VBP1	ENSG00000155959	0.121778	4.93317	0.7544	0.385087	0.499096
MMP16	ENSG00000156103	2.43295	2.12044	31.9672	1.57e-08	1.17e-07
BACH1	ENSG00000156273	1.03468	5.66838	47.1847	6.46e-12	7.57e-11
UQCRB	ENSG00000156467	-0.255974	7.28345	2.63949	0.104237	0.174252
TYSND1	ENSG00000156521	-0.17777	4.72268	2.14757	0.142796	0.226544
PHF6	ENSG00000156531	0.0601861	4.43426	0.11084	0.73919	0.81363
CD109	ENSG00000156535	0.942501	6.28937	10.389	0.00126765	0.00372967
AIFM1	ENSG00000156709	-1.92383	6.83679	44.3493	2.75e-11	2.94e-10
MAPK13	ENSG00000156711	0.800951	5.50324	16.3308	5.32e-05	0.000210751
MYO1E	ENSG00000157483	0.359445	6.19443	6.25842	0.0123605	0.0283466
FMNL2	ENSG00000157827	0.796361	6.22007	25.2405	5.06e-07	2.92e-06
SKI	ENSG00000157933	0.575529	6.731	15.3795	8.79e-05	0.000333026
CUL4B	ENSG00000158290	0.49253	6.11266	22.5165	2.08e-06	1.08e-05
ELK4	ENSG00000158711	0.400013	5.68915	9.94096	0.00161641	0.00463737
ADAMTS4	ENSG00000158859	3.28917	5.5745	99.0886	2.41e-23	1.13e-21
PAXBP1	ENSG00000159086	-0.033665	4.8246	0.0490947	0.824646	0.878539
MORC3	ENSG00000159256	0.616591	5.00076	24.3916	7.86e-07	4.37e-06
CHAF1B	ENSG00000159259	1.92215	2.14869	56.9603	4.45e-14	6.74e-13
PTMS	ENSG00000159335	-0.216693	7.93969	2.46603	0.116331	0.191254
HK2	ENSG00000159399	4.96717	6.42976	235.426	3.91e-53	4.12e-50
SSU72	ENSG00000160075	-0.657629	6.21918	27.8042	1.34e-07	8.54e-07
UBE2J2	ENSG00000160087	0.027053	5.3253	0.0428924	0.835928	0.886578
VAV2	ENSG00000160293	-0.509112	5.87581	11.8511	0.000576279	0.00183468
PCNT	ENSG00000160299	-0.173529	5.01527	1.96434	0.16105	0.249722
ZNF714	ENSG00000160352	0.517482	1.82271	3.69107	0.0547044	0.101713
RDH13	ENSG00000160439	0.785512	4.8304	11.7595	0.000605343	0.00191877
CHTOP	ENSG00000160679	-0.0111018	5.78109	0.00962738	0.921838	0.947785
LY6K	ENSG00000160886	-2.04086	0.0543521	18.2208	1.97e-05	8.52e-05
ACOX1	ENSG00000161533	-1.5086	6.22984	70.6203	4.33e-17	9.61e-16
SRSF2	ENSG00000161547	-0.028911	6.46907	0.0438348	0.834161	0.885261
FMNL3	ENSG00000161791	1.44878	6.19649	69.5022	7.63e-17	1.65e-15
EIF4A1	ENSG00000161960	0.893878	2.33716	8.92252	0.00281675	0.00760882
SHANK2	ENSG00000162105	-0.299268	4.97495	3.2244	0.0725483	0.12883
UBXN1	ENSG00000162191	-0.159701	6.23721	1.15527	0.282449	0.390574
STX5	ENSG00000162236	-0.0315456	5.14347	0.0774663	0.780761	0.844979
FUBP1	ENSG00000162613	0.225651	6.16603	3.08621	0.0789584	0.138206
AGL	ENSG00000162688	-0.619396	5.00391	14.1555	0.000168306	0.000600835
VCAM1	ENSG00000162692	1.445	8.48861	18.0042	2.2e-05	9.46e-05
SLC30A7	ENSG00000162695	0.746812	5.2817	18.6022	1.61e-05	7.1e-05
PEA15	ENSG00000162734	1.07826	7.66304	51.6149	6.75e-13	8.94e-12
FCAMR	ENSG00000162897	-4.82307	5.04012	63.4771	1.62e-15	2.96e-14
KIAA1841	ENSG00000162929	1.0136	2.59801	25.8291	3.73e-07	2.2e-06
ARL5A	ENSG00000162980	0.251666	4.94246	2.43001	0.119032	0.194787
PDLIM5	ENSG00000163110	0.107956	6.7433	0.631103	0.426951	0.540182
S100A11	ENSG00000163191	1.38328	8.11012	46.262	1.03e-11	1.18e-10
CLDN1	ENSG00000163347	0.664501	5.56498	2.91805	0.0875937	0.15084
EOGT	ENSG00000163378	1.09465	4.45752	44.5804	2.44e-11	2.64e-10
FSTL1	ENSG00000163430	1.5933	8.40757	26.3199	2.89e-07	1.74e-06
PRKCI	ENSG00000163558	-0.0986138	5.06071	0.380629	0.537267	0.643098
CTLA4	ENSG00000163599	2.14644	1.09472	20.9342	4.75e-06	2.32e-05
THOC7	ENSG00000163634	-0.242677	4.76464	2.80296	0.0940902	0.159782
GMPS	ENSG00000163655	0.210289	5.28894	2.76932	0.096087	0.162588
ZNF148	ENSG00000163848	-0.0351733	5.58347	0.0704035	0.79075	0.852471
YEATS2	ENSG00000163872	1.50119	5.73522	67.3754	2.24e-16	4.56e-15
PBRM1	ENSG00000163939	-0.123296	4.99399	0.729776	0.392956	0.506956
AIMP1	ENSG00000164022	0.166014	5.33008	1.83939	0.175022	0.267253
PGRMC2	ENSG00000164040	0.231532	6.75704	2.30993	0.12855	0.207616
RNF123	ENSG00000164068	-1.04461	4.70604	73.2332	1.15e-17	2.76e-16
HSPA4L	ENSG00000164070	-0.182556	5.04759	0.631429	0.426832	0.54018
WDR82	ENSG00000164091	-0.0185566	6.45384	0.0276959	0.867826	0.909737
ARFIP1	ENSG00000164144	-0.0815447	4.95595	0.326291	0.567851	0.66984
HHIP	ENSG00000164161	-3.31708	0.80501	35.1157	3.11e-09	2.55e-08
PRRC1	ENSG00000164244	0.327501	6.0002	5.3836	0.0203269	0.043671
CASP3	ENSG00000164305	0.952187	4.51615	32.0654	1.49e-08	1.11e-07
RICTOR	ENSG00000164327	0.0471597	5.18127	0.127816	0.720707	0.798991
NSA2	ENSG00000164346	0.397821	5.91884	6.01277	0.0142027	0.0320104
SLC35A1	ENSG00000164414	0.175863	3.29639	1.19272	0.274782	0.382278
CREBRF	ENSG00000164463	-0.154661	5.55041	1.48036	0.223717	0.324391
SAP30L	ENSG00000164576	-0.251716	5.6944	4.1691	0.0411676	0.0799028
DNAAF5	ENSG00000164818	0.327054	5.05149	4.73758	0.0295105	0.0602915
NOS3	ENSG00000164867	0.692924	4.56315	7.59529	0.0058521	0.014618
CDK5	ENSG00000164885	-0.0252167	3.8904	0.0232004	0.878937	0.917566
FOXK1	ENSG00000164916	0.320027	5.75407	8.23105	0.00411798	0.0106982
YWHAZ	ENSG00000164924	0.565598	8.79448	20.8085	5.08e-06	2.47e-05
TP53INP1	ENSG00000164938	0.656115	6.044	9.30675	0.00228311	0.00631764
INTS8	ENSG00000164941	0.714576	4.64321	23.1971	1.46e-06	7.78e-06
PSIP1	ENSG00000164985	-0.256034	5.86594	2.32201	0.127555	0.206336
STRBP	ENSG00000165209	-0.97945	4.03049	25.1214	5.38e-07	3.08e-06
GAPVD1	ENSG00000165219	-0.0976365	5.49347	0.47198	0.492078	0.601732
CFL2	ENSG00000165410	-0.521881	4.98713	10.2342	0.00137859	0.00400922
TTC8	ENSG00000165533	-0.826899	3.62931	33.3005	7.9e-09	6.14e-08
GHITM	ENSG00000165678	-1.19378	7.78169	53.033	3.28e-13	4.51e-12
PACSIN3	ENSG00000165912	-1.26781	3.91509	15.4363	8.53e-05	0.000324276
ARL5B	ENSG00000165997	0.404206	4.65113	5.74877	0.0165002	0.0364401
HTRA1	ENSG00000166033	0.40406	7.88791	2.81643	0.0933037	0.158644
SPRED1	ENSG00000166068	0.862706	5.98081	38.2801	6.13e-10	5.54e-09
GPT2	ENSG00000166123	-2.01226	5.48193	28.0746	1.17e-07	7.51e-07
IKBIP	ENSG00000166130	2.05206	5.3538	79.854	4.03e-19	1.17e-17
BAG5	ENSG00000166170	-0.204535	5.35516	1.31703	0.251127	0.356326
NOLC1	ENSG00000166197	0.269338	5.95436	4.02888	0.0447277	0.0856673
SGPL1	ENSG00000166224	0.214824	6.10025	4.08911	0.0431605	0.0831401
CCT2	ENSG00000166226	-0.0310082	6.67193	0.0538594	0.816479	0.87198
WBP1L	ENSG00000166272	0.493951	6.17239	15.9209	6.6e-05	0.000256838
ANAPC16	ENSG00000166295	-0.122956	6.73276	0.795352	0.372487	0.486326
TMX3	ENSG00000166479	0.423365	5.74858	10.0487	0.00152455	0.0043952
WEE1	ENSG00000166483	-0.195665	4.53569	0.95558	0.328303	0.439781
AP1G1	ENSG00000166747	-0.47264	6.7456	10.1185	0.00146791	0.00424287
MARF1	ENSG00000166783	-0.0358373	6.33502	0.0813289	0.775504	0.840901
ANPEP	ENSG00000166825	-2.00331	9.27741	15.6471	7.63e-05	0.000293243
PLK1	ENSG00000166851	1.9474	2.50908	46.6682	8.41e-12	9.74e-11
NEMP1	ENSG00000166881	0.880785	4.50509	42.4271	7.34e-11	7.47e-10
MRPL16	ENSG00000166902	-0.510558	5.04767	9.75097	0.00179228	0.00509583
SMAD3	ENSG00000166949	-0.172135	6.15754	1.29051	0.255953	0.361579
NKX3-1	ENSG00000167034	-0.19841	0.753589	0.362787	0.546963	0.651976
STIM1	ENSG00000167323	0.615409	5.92403	12.6987	0.000365913	0.00121193
MIDN	ENSG00000167470	0.295626	6.77621	2.7802	0.0954365	0.161724
AXL	ENSG00000167601	2.2638	6.23211	76.8525	1.84e-18	4.9e-17
EEF2	ENSG00000167658	0.313468	10.9195	4.24742	0.03931	0.0769454
CHAF1A	ENSG00000167670	0.980071	3.36847	28.669	8.59e-08	5.66e-07
ZNF83	ENSG00000167766	0.526358	6.45388	7.73607	0.00541285	0.0136295
KRT80	ENSG00000167767	1.65001	3.50009	10.6319	0.00111152	0.00331966
ECI1	ENSG00000167969	-0.841497	6.04106	14.0006	0.000182757	0.000647435
KCTD5	ENSG00000167977	0.57995	4.6089	14.9623	0.00010968	0.000408158
CTNNB1	ENSG00000168036	-0.122147	8.10017	0.819603	0.365296	0.478832
FADD	ENSG00000168040	0.167445	3.06362	1.16835	0.27974	0.387453
RBPJ	ENSG00000168214	0.668679	6.31161	28.2493	1.07e-07	6.9e-07
UBTD2	ENSG00000168246	-0.14622	4.62405	1.21018	0.271297	0.37843
IRF2BP2	ENSG00000168264	0.412284	7.16525	7.4954	0.00618566	0.0153666
CDC40	ENSG00000168438	-0.0908748	4.4741	0.383769	0.535593	0.641454
STAT3	ENSG00000168610	0.103601	7.66405	0.602458	0.437642	0.550331
CNNM3	ENSG00000168763	0.249006	5.03051	2.13988	0.143513	0.227495
SNTB2	ENSG00000168807	-0.278385	5.21344	3.55605	0.0593288	0.108939
INPP5D	ENSG00000168918	2.03618	5.63324	110.484	7.68e-26	4.86e-24
MFF	ENSG00000168958	-0.22223	5.87493	2.43254	0.11884	0.194549
UQCRFS1	ENSG00000169021	-1.20891	6.20523	41.3029	1.3e-10	1.29e-09
MECP2	ENSG00000169057	-0.101911	6.09811	0.640637	0.42348	0.536842
RAB3B	ENSG00000169213	-2.55746	1.56786	13.8171	0.000201496	0.000707972
NMD3	ENSG00000169251	0.359096	5.61701	7.12929	0.00758346	0.0184202
SLC33A1	ENSG00000169359	-0.139551	4.69578	0.540247	0.46233	0.573161
SIN3A	ENSG00000169375	0.0791128	5.77214	0.501249	0.478952	0.589319
CXCL8	ENSG00000169429	1.8903	5.85353	11.5478	0.0006783	0.00212558
PLEKHA2	ENSG00000169499	1.17753	6.39245	46.1072	1.12e-11	1.27e-10
CLIC4	ENSG00000169504	-0.551684	8.96186	2.81904	0.0931519	0.158467
ANTXR1	ENSG00000169604	0.674004	6.37128	5.32456	0.0210269	0.0450098
LUZP1	ENSG00000169641	0.0482369	5.6766	0.0900552	0.764107	0.832478
TAPT1	ENSG00000169762	-0.258715	5.0013	2.09923	0.147373	0.232505
HNRNPA3	ENSG00000170144	0.0674177	7.59021	0.372427	0.541684	0.647215
GLB1	ENSG00000170266	-0.709383	5.98206	30.0828	4.14e-08	2.87e-07
FOS	ENSG00000170345	-0.931133	9.62786	5.26112	0.021807	0.046493
SMAD1	ENSG00000170365	0.068081	3.66653	0.152204	0.696438	0.778271
SLC30A1	ENSG00000170385	-0.197892	5.88316	1.36433	0.242789	0.346613
CDH2	ENSG00000170558	0.688249	6.18324	3.01491	0.082502	0.143426
SOCS6	ENSG00000170677	0.300921	4.83435	4.50237	0.0338479	0.0677309
KBTBD2	ENSG00000170852	0.626694	5.60234	21.1138	4.33e-06	2.13e-05
LSM3	ENSG00000170860	-1.03875	4.93122	49.0023	2.56e-12	3.14e-11
ZNF160	ENSG00000170949	0.604703	5.14607	14.858	0.000115916	0.000428815
S1PR1	ENSG00000170989	1.11046	6.06606	26.106	3.23e-07	1.93e-06
PKIA	ENSG00000171033	-0.12558	2.50568	0.102583	0.748752	0.821121
FEZ2	ENSG00000171055	0.276474	5.50286	4.91001	0.0267015	0.0553488
JUNB	ENSG00000171223	-0.120509	8.22794	0.10835	0.742031	0.815875
FAM98B	ENSG00000171262	-0.153163	4.79734	1.77748	0.182459	0.276241
CHD7	ENSG00000171316	-0.200649	4.37537	1.46098	0.226775	0.328044
ZNF561	ENSG00000171469	0.223297	4.71797	3.2106	0.0731625	0.129752
TBCA	ENSG00000171530	0.172065	6.27174	1.62963	0.201754	0.298716
CAMTA1	ENSG00000171735	-0.47964	4.91666	8.97789	0.00273266	0.00740935
GATM	ENSG00000171766	-3.90708	9.91019	140.457	2.11e-32	2.69e-30
RRM2	ENSG00000171848	2.62388	3.12793	63.2409	1.83e-15	3.32e-14
PTEN	ENSG00000171862	0.168739	6.59284	1.73461	0.187824	0.282215
KRCC1	ENSG00000172086	0.198048	4.98725	2.41421	0.120238	0.196433
CEBPB	ENSG00000172216	1.51105	6.27636	31.0327	2.54e-08	1.83e-07
PDE3A	ENSG00000172572	-0.382807	4.63005	2.3135	0.128255	0.207309
CORO1B	ENSG00000172725	-0.111795	6.45024	1.03079	0.309974	0.420251
MUS81	ENSG00000172732	0.325911	5.10733	8.57436	0.0034093	0.00903864
NAA16	ENSG00000172766	-0.0117151	3.48863	0.00715304	0.932599	0.95534
MYD88	ENSG00000172936	0.348512	5.67188	5.72963	0.016681	0.0367799
LCLAT1	ENSG00000172954	-0.523816	4.03859	6.37786	0.0115552	0.0267383
TADA2B	ENSG00000173011	-0.197573	5.28116	1.57748	0.209124	0.30768
ESRRA	ENSG00000173153	-0.777846	6.12197	16.8905	3.96e-05	0.000161533
RAPH1	ENSG00000173166	0.325182	2.16649	2.11071	0.146271	0.231076
VANGL1	ENSG00000173218	0.183291	4.95991	1.3156	0.251384	0.356538
OLR1	ENSG00000173391	1.32383	4.28419	14.3496	0.000151813	0.000547018
DAG1	ENSG00000173402	-0.724426	6.68725	37.6665	8.39e-10	7.43e-09
SSSCA1	ENSG00000173465	-0.000417227	3.85599	9.16e-06	0.997585	0.998454
CCR9	ENSG00000173585	0.926792	-1.28005	0.830852	0.362026	0.47538
CEP83	ENSG00000173588	0.120336	3.09909	0.581337	0.445789	0.55782
TOMM20	ENSG00000173726	0.41221	7.69084	5.73672	0.0166138	0.0366467
JUP	ENSG00000173801	-0.993806	7.72238	32.6285	1.12e-08	8.49e-08
DPY19L1	ENSG00000173852	1.34327	5.00986	70.439	4.75e-17	1.05e-15
SWSAP1	ENSG00000173928	-0.585405	1.76042	10.2246	0.00138578	0.00402709
LEMD3	ENSG00000174106	0.216966	4.90145	2.49098	0.1145	0.188652
GCSAM	ENSG00000174500	0.262044	0.584308	0.408496	0.522734	0.629837
UGT8	ENSG00000174607	-0.566787	4.88047	2.7688	0.0961183	0.162629
TMEM167A	ENSG00000174695	0.229686	6.47721	2.27305	0.13164	0.211644
PDE12	ENSG00000174840	-0.807771	4.55953	29.2789	6.27e-08	4.22e-07
VCPIP1	ENSG00000175073	0.198237	4.80921	2.08167	0.149077	0.23462
CSRP2	ENSG00000175183	-0.0912924	5.22523	0.141468	0.706826	0.787031
PCCA	ENSG00000175198	-2.19865	5.90668	70.5954	4.39e-17	9.72e-16
CKAP5	ENSG00000175216	0.271453	5.84618	4.51005	0.0336963	0.0674858
SMAD2	ENSG00000175387	0.127879	5.91694	1.1303	0.287712	0.396526
EIF3F	ENSG00000175390	0.0522295	6.86256	0.179528	0.671779	0.758697
ARL10	ENSG00000175414	1.29891	4.38966	21.0531	4.47e-06	2.19e-05
LPL	ENSG00000175445	-0.182181	4.73121	0.191415	0.661741	0.75113
DRAP1	ENSG00000175550	0.253724	5.83618	3.25425	0.0712386	0.126903
RAB6A	ENSG00000175582	0.350954	6.8361	8.96908	0.00274587	0.00743933
MBLAC2	ENSG00000176055	-0.232176	3.07841	1.81435	0.177987	0.270727
MEX3C	ENSG00000176624	0.0961234	4.87297	0.454897	0.500019	0.608981
MYO1D	ENSG00000176658	0.0548166	6.21769	0.0743729	0.785073	0.848219
FAM91A1	ENSG00000176853	0.320418	5.96951	3.709	0.0541199	0.100829
NFATC2IP	ENSG00000176953	0.134601	5.16225	1.18433	0.276476	0.383966
DPP7	ENSG00000176978	0.421353	7.3125	4.10366	0.0427906	0.0825581
CHD9	ENSG00000177200	0.118721	6.06969	0.492746	0.482705	0.59274
ZBTB38	ENSG00000177311	0.147919	6.63662	0.723683	0.394938	0.509015
JUN	ENSG00000177606	0.164425	8.94433	0.372857	0.541451	0.647003
AGTRAP	ENSG00000177674	-0.366219	5.67273	5.20953	0.0224634	0.0477123
DDX10	ENSG00000178105	-0.867838	4.6277	17.8457	2.4e-05	0.000102188
LCORL	ENSG00000178177	-0.030409	3.28874	0.0329851	0.855883	0.901056
KDELC2	ENSG00000178202	1.22246	6.03038	77.4076	1.39e-18	3.75e-17
GEN1	ENSG00000178295	0.36418	3.40136	3.73699	0.0532204	0.0993933
SUZ12	ENSG00000178691	0.0690359	5.0832	0.320396	0.57137	0.673099
FOXE1	ENSG00000178919	-2.02314	-1.11262	5.4723	0.0193202	0.0417951
AURKB	ENSG00000178999	3.54042	1.81008	76.8712	1.82e-18	4.86e-17
KLHL28	ENSG00000179454	0.366443	3.6577	5.61533	0.0178041	0.0389446
ZBTB18	ENSG00000179456	-0.0434304	5.02441	0.0872869	0.767655	0.83497
SERTAD2	ENSG00000179833	1.00155	5.60943	33.8815	5.86e-09	4.64e-08
EXOC3	ENSG00000180104	0.346672	6.37863	3.96397	0.0464839	0.0885259
TDRD6	ENSG00000180113	0.228558	1.57452	0.301468	0.582964	0.683247
PAK2	ENSG00000180370	0.545392	6.57135	18.6492	1.57e-05	6.95e-05
TMEM136	ENSG00000181264	0.826324	3.36542	17.3881	3.05e-05	0.000127148
ZNF678	ENSG00000181450	0.342801	2.72705	3.58274	0.0583828	0.107534
WRB	ENSG00000182093	-0.00858825	4.31267	0.00224572	0.962203	0.975315
CREB3L2	ENSG00000182158	0.404434	6.69657	6.30588	0.0120338	0.0276797
LDOC1	ENSG00000182195	-0.966116	4.6862	15.9591	6.47e-05	0.000252168
EXOC7	ENSG00000182473	0.0221251	6.0764	0.0353267	0.850913	0.897597
CSF1R	ENSG00000182578	2.01765	7.02476	67.1376	2.53e-16	5.11e-15
TRAK1	ENSG00000182606	-0.522627	5.89471	10.0019	0.00156383	0.00450045
ANXA2	ENSG00000182718	1.5839	8.76914	83.691	5.78e-20	1.84e-18
CNOT10	ENSG00000182973	-0.532198	3.97937	19.6733	9.19e-06	4.27e-05
PSMG1	ENSG00000183527	-0.379047	3.8739	7.74558	0.00538441	0.0135742
ZNF703	ENSG00000183779	0.487892	3.71844	1.65251	0.198617	0.29492
KMT5A	ENSG00000183955	0.264046	4.53799	4.24301	0.0394122	0.0771259
EIF3C	ENSG00000184110	-0.262807	3.14031	2.61317	0.10598	0.176631
CMSS1	ENSG00000184220	0.064883	3.6697	0.0835255	0.772575	0.838865
PCDH9	ENSG00000184226	-3.49943	1.99447	45.0669	1.9e-11	2.09e-10
TACSTD2	ENSG00000184292	-3.98248	5.53582	64.3445	1.04e-15	1.95e-14
SOCS3	ENSG00000184557	0.41564	7.19471	1.1465	0.284282	0.392524
BRI3BP	ENSG00000184992	0.156674	4.40914	0.744283	0.388292	0.502108
TNFAIP2	ENSG00000185215	0.869737	7.2212	22.7087	1.89e-06	9.84e-06
CCDC137	ENSG00000185298	0.165393	4.34653	1.91522	0.166384	0.256755
ARL15	ENSG00000185305	-0.156015	5.13122	0.558453	0.454884	0.566299
SOCS1	ENSG00000185338	0.156854	3.27413	0.254775	0.613732	0.709895
METTL7A	ENSG00000185432	-1.44922	7.71484	24.6424	6.9e-07	3.87e-06
SP1	ENSG00000185591	0.386702	6.92543	9.12994	0.00251461	0.00687199
MYBL1	ENSG00000185697	2.27629	3.04551	77.5159	1.32e-18	3.56e-17
ANKFY1	ENSG00000185722	-0.0707963	5.78431	0.26945	0.603701	0.700813
MARC1	ENSG00000186205	-0.381162	3.50259	2.66859	0.102347	0.171613
UBE2H	ENSG00000186591	-0.102395	6.97094	0.464652	0.495458	0.60484
MITF	ENSG00000187098	-0.210102	5.31093	1.2819	0.257546	0.363209
DYNC2H1	ENSG00000187240	-0.551002	4.6285	10.7302	0.00105404	0.00316102
TCEA1	ENSG00000187735	0.2751	5.85456	5.22641	0.0222464	0.0473035
SECISBP2	ENSG00000187742	-0.520041	5.69171	17.638	2.67e-05	0.000112712
UBQLN2	ENSG00000188021	0.287231	5.55628	6.57927	0.0103173	0.0241708
AGRN	ENSG00000188157	0.790785	8.98297	13.0612	0.000301481	0.00101641
PTAR1	ENSG00000188647	-0.284166	5.85137	2.98914	0.0838248	0.145333
ARID2	ENSG00000189079	0.35157	5.02145	5.01073	0.0251907	0.0526362
AKR1C3	ENSG00000196139	-0.553317	6.99911	2.15388	0.14221	0.225738
SUPT5H	ENSG00000196235	0.0953636	6.97571	0.658196	0.417198	0.530599
ZNF493	ENSG00000196268	-0.781471	3.46614	24.7525	6.52e-07	3.67e-06
MYO6	ENSG00000196586	-1.51389	6.81679	36.6709	1.4e-09	1.2e-08
TCF4	ENSG00000196628	1.48571	6.46926	44.4231	2.65e-11	2.84e-10
ZKSCAN5	ENSG00000196652	0.168027	3.86044	1.33922	0.247171	0.351847
ZNF431	ENSG00000196705	0.529109	3.6518	8.62084	0.00332338	0.00882957
STRN3	ENSG00000196792	-0.200786	4.66717	1.73516	0.187753	0.282135
KPNA5	ENSG00000196911	0.0125274	3.49769	0.00603094	0.938099	0.959372
FLNA	ENSG00000196924	1.13381	9.81127	29.3397	6.07e-08	4.1e-07
FAM3C	ENSG00000196937	0.0043363	5.43669	0.000479784	0.982525	0.988801
SLC39A10	ENSG00000196950	0.259919	4.96747	2.65816	0.10302	0.172529
IGF2R	ENSG00000197081	0.149951	7.73327	1.06805	0.301386	0.411198
KANK2	ENSG00000197256	0.463478	7.01871	4.75247	0.0292563	0.0598441
FITM2	ENSG00000197296	-0.342453	4.52702	2.58813	0.107667	0.178992
PELI1	ENSG00000197329	0.699327	5.02889	16.3502	5.26e-05	0.000208815
ZNF98	ENSG00000197360	-3.33166	-0.701282	19.6199	9.45e-06	4.38e-05
FAR1	ENSG00000197601	0.328173	5.49992	5.60388	0.0179208	0.0391615
ADH5	ENSG00000197894	-0.858163	7.23716	33.3613	7.65e-09	5.96e-08
MPZL1	ENSG00000197965	1.28105	6.90161	34.6523	3.94e-09	3.19e-08
ZNF273	ENSG00000198039	0.969953	1.67152	16.1653	5.8e-05	0.000228692
ZNF248	ENSG00000198105	0.660733	4.61889	12.7452	0.000356923	0.00118453
MAN1A2	ENSG00000198162	-0.0427756	5.74639	0.0931444	0.760217	0.829915
DDRGK1	ENSG00000198171	-0.0183873	5.83133	0.0211716	0.884312	0.921034
QRICH1	ENSG00000198218	-0.301048	5.63715	8.34136	0.00387526	0.0101268
CARD11	ENSG00000198286	3.1598	4.44253	89.9748	2.41e-21	9.11e-20
ASPH	ENSG00000198363	1.01567	7.54993	42.862	5.87e-11	6.08e-10
TXNRD1	ENSG00000198431	0.361767	6.60596	5.15176	0.0232228	0.0490464
ZNF28	ENSG00000198538	0.714566	3.89044	19.8311	8.46e-06	3.95e-05
TTC37	ENSG00000198677	0.120296	6.40329	0.847259	0.357329	0.470306
F5	ENSG00000198734	-1.32866	3.22262	3.5037	0.0612319	0.111777
ZNF652	ENSG00000198740	-0.112008	4.45727	0.710051	0.399427	0.513258
CDC42BPB	ENSG00000198752	-0.258292	6.7531	2.32115	0.127626	0.206422
INPP5F	ENSG00000198825	-0.465098	4.45736	10.8439	0.000991205	0.00299079
UBE2J1	ENSG00000198833	0.681685	6.28306	30.3682	3.57e-08	2.51e-07
SELENOT	ENSG00000198843	0.0933453	6.38465	0.633527	0.426065	0.539522
LTN1	ENSG00000198862	0.393536	5.00223	5.81408	0.0158983	0.03533
RPL39	ENSG00000198918	0.898569	6.62046	32.0729	1.48e-08	1.11e-07
DMD	ENSG00000198947	0.825597	4.37767	12.0793	0.000509837	0.00163643
TGM2	ENSG00000198959	2.40681	8.7936	44.3783	2.71e-11	2.9e-10
MAFB	ENSG00000204103	1.28973	6.19446	34.9525	3.38e-09	2.75e-08
RING1	ENSG00000204227	-0.471606	5.56099	15.5688	7.96e-05	0.000304379
NEU1	ENSG00000204386	0.0657387	6.80555	0.0989769	0.753061	0.824423
ABHD16A	ENSG00000204427	-0.0621034	1.31514	0.0811892	0.775692	0.841026
ZNF468	ENSG00000204604	0.350138	4.02891	5.1699	0.0229815	0.04863
EIF3CL	ENSG00000205609	-0.253743	-0.896487	0.302145	0.582541	0.682889
DNAJC19	ENSG00000205981	-0.815812	4.83844	36.949	1.21e-09	1.05e-08
SACM1L	ENSG00000211456	-0.808223	5.43655	27.6781	1.43e-07	9.08e-07
ZNF611	ENSG00000213020	0.799874	4.05852	17.0023	3.73e-05	0.000153214
NUP62	ENSG00000213024	0.720151	5.80878	27.9358	1.25e-07	8.03e-07
DENND1B	ENSG00000213047	-0.266308	4.16058	1.8306	0.176057	0.268409
ZNF254	ENSG00000213096	-0.105878	3.57313	0.437407	0.508376	0.616871
UBXN2B	ENSG00000215114	0.0927064	5.15048	0.349075	0.554637	0.658375
HOMEZ	ENSG00000215271	-1.04518	3.85849	28.9601	7.39e-08	4.92e-07
PAM16	ENSG00000217930	0.15788	1.79972	0.361742	0.547541	0.652309
PPP2R2A	ENSG00000221914	0.250041	5.43982	3.35101	0.0671638	0.120834
ZNF492	ENSG00000229676	-0.662329	-1.62994	1.77789	0.182409	0.276202
HLA-DPA1	ENSG00000231389	2.36004	9.32509	155.573	1.05e-35	1.99e-33
PRAF2	ENSG00000243279	-0.171284	2.82201	0.758744	0.383722	0.497828
ZNF260	ENSG00000254004	-0.100748	4.25411	0.617081	0.432134	0.545077
MTRNR2L1	ENSG00000256618	-0.959113	-1.49141	2.33485	0.126507	0.204972
CUX1	ENSG00000257923	-0.572301	7.1733	14.4372	0.000144913	0.000524523
CHURC1	ENSG00000258289	-0.10115	5.25086	0.495228	0.481605	0.591828
IKBKE	ENSG00000263528	1.19255	3.54816	38.0737	6.81e-10	6.11e-09
CYFIP1	ENSG00000273749	0.67635	7.23885	26.0162	3.39e-07	2.01e-06
MARCKS	ENSG00000277443	1.92028	7.62868	63.4275	1.66e-15	3.03e-14

## Sheet: miR210-3p_targets
Gene	ensembl_id	logFC	logCPM	LR	PValue	FDR
RAD52	ENSG00000002016	0.260906	3.24759	1.90964	0.167003	0.257521
THSD7A	ENSG00000005108	-1.52716	4.61501	18.0542	2.15e-05	9.23e-05
BTK	ENSG00000010671	2.64156	3.52527	78.2129	9.25e-19	2.56e-17
MRE11	ENSG00000020922	0.518312	4.28253	14.2609	0.000159134	0.00057091
EHD2	ENSG00000024422	2.56305	7.82534	100.238	1.35e-23	6.47e-22
FOXP3	ENSG00000049768	2.47988	1.64227	27.1432	1.89e-07	1.17e-06
FOXN3	ENSG00000053254	0.680069	5.73231	13.9296	0.000189782	0.000670373
VMP1	ENSG00000062716	0.974526	8.09409	17.3208	3.16e-05	0.000131332
U2AF2	ENSG00000063244	0.0813782	6.98527	0.546483	0.459758	0.57095
TNPO3	ENSG00000064419	-0.0676801	5.72446	0.409827	0.522057	0.629251
INPP5A	ENSG00000068383	-0.257183	4.509	2.25951	0.132796	0.213192
MNT	ENSG00000070444	0.270505	4.3955	4.17847	0.0409406	0.0795407
TFRC	ENSG00000072274	0.316262	6.03875	4.04782	0.0442285	0.0848765
HOXA9	ENSG00000078399	-1.54821	3.97819	12.0452	0.000519248	0.00166456
RUNX1T1	ENSG00000079102	-0.394991	2.51414	1.53565	0.215267	0.314836
TNPO1	ENSG00000083312	0.0339692	6.57188	0.0690831	0.792676	0.853829
SEH1L	ENSG00000085415	0.131567	4.73785	0.871707	0.350483	0.463323
DIMT1	ENSG00000086189	0.403661	4.5634	7.3917	0.00655257	0.0161688
HECTD1	ENSG00000092148	-0.248777	6.82535	2.69597	0.100602	0.169079
TNRC6B	ENSG00000100354	-0.0237346	5.06441	0.0402554	0.840982	0.890185
KCNK10	ENSG00000100433	-5.237	1.95141	80.628	2.72e-19	8.03e-18
HIF1A	ENSG00000100644	-0.291852	6.97051	2.21647	0.136545	0.218152
SMCHD1	ENSG00000101596	0.674699	5.47088	20.507	5.94e-06	2.86e-05
MIB1	ENSG00000101752	-0.306335	5.51578	4.39385	0.0360688	0.0715139
ATP11C	ENSG00000101974	0.0285817	5.19053	0.0314996	0.85913	0.903359
MGRN1	ENSG00000102858	0.58851	6.85964	18.2756	1.91e-05	8.3e-05
SCN1B	ENSG00000105711	1.67637	4.27812	72.6372	1.56e-17	3.67e-16
SIPA1L3	ENSG00000105738	0.14721	5.66046	0.83215	0.361652	0.474996
HOXA1	ENSG00000105991	0.236601	0.597975	0.559199	0.454583	0.566011
HOXA3	ENSG00000105997	-0.291187	3.72149	2.00289	0.157	0.244851
CBX1	ENSG00000108468	-0.0547624	5.65567	0.193127	0.660327	0.749894
HSD17B1	ENSG00000108786	-0.219732	0.944043	0.7437	0.388478	0.50231
POU2AF1	ENSG00000110777	0.840766	2.81178	1.22178	0.269011	0.376012
ELK3	ENSG00000111145	1.03656	5.97527	35.8211	2.16e-09	1.81e-08
LDHB	ENSG00000111716	-1.69998	5.20663	82.1397	1.27e-19	3.92e-18
MCM3	ENSG00000112118	0.539904	5.76215	17.7965	2.46e-05	0.000104498
MDGA1	ENSG00000112139	-0.0196653	2.70973	0.00296464	0.956578	0.971811
E2F3	ENSG00000112242	-0.0815573	4.23693	0.225986	0.634516	0.728009
ALDH5A1	ENSG00000112294	-1.29447	5.272	55.2689	1.05e-13	1.53e-12
HMGCS1	ENSG00000112972	-0.487297	5.01501	9.17847	0.00244879	0.0067143
ICMT	ENSG00000116237	-0.814563	6.53272	32.5881	1.14e-08	8.64e-08
RPL22	ENSG00000116251	-0.00485389	6.77739	0.00106007	0.974026	0.983044
MEF2D	ENSG00000116604	0.464511	6.41054	12.2326	0.000469618	0.00152061
DOCK7	ENSG00000116641	0.410944	5.19171	6.17651	0.0129457	0.0295047
VAMP4	ENSG00000117533	0.230087	4.38059	2.10032	0.147268	0.232381
STMN1	ENSG00000117632	-0.0899577	5.65457	0.263408	0.607789	0.704367
CASP8AP2	ENSG00000118412	0.294942	3.88314	2.57243	0.108741	0.180478
PTBP3	ENSG00000119314	-0.0779968	6.39322	0.304012	0.581378	0.681961
GTDC1	ENSG00000121964	0.0703457	4.13241	0.169947	0.680159	0.765329
TWIST1	ENSG00000122691	0.0108225	0.553819	0.000632134	0.979941	0.986931
HIF3A	ENSG00000124440	-0.831214	2.49062	4.60372	0.0319027	0.0643837
DYRK2	ENSG00000127334	0.943548	5.26178	33.0837	8.83e-09	6.83e-08
FGFRL1	ENSG00000127418	-0.0141071	5.66327	0.0066573	0.934971	0.956878
UBA1	ENSG00000130985	-0.570838	8.0594	17.8907	2.34e-05	9.99e-05
SH3BGRL	ENSG00000131171	0.400005	7.02033	6.07577	0.0137048	0.0309999
LDHA	ENSG00000134333	2.21101	10.1543	190.907	2.02e-43	7.78e-41
COL4A2	ENSG00000134871	1.72048	9.90733	46.2744	1.03e-11	1.17e-10
APC	ENSG00000134982	0.126409	5.13556	0.732283	0.392144	0.505977
UBQLN1	ENSG00000135018	-0.338508	6.69272	6.67236	0.00979192	0.02308
ESPL1	ENSG00000135476	-1.15726	3.67188	11.4065	0.000731892	0.00227658
ACVR1B	ENSG00000135503	-1.00235	6.28314	37.8298	7.72e-10	6.87e-09
ISCU	ENSG00000136003	-0.969122	7.04124	25.7826	3.82e-07	2.25e-06
XPA	ENSG00000136936	-0.502115	3.66127	12.11	0.000501509	0.0016126
PIM1	ENSG00000137193	0.534347	5.62975	6.54489	0.0105186	0.0245954
CPEB2	ENSG00000137449	0.778042	6.02659	21.6809	3.22e-06	1.62e-05
FCHSD2	ENSG00000137478	0.652489	5.36233	24.2751	8.35e-07	4.62e-06
ACTR1A	ENSG00000138107	-0.157836	6.48013	1.89919	0.168169	0.258923
ERP27	ENSG00000139055	-3.60172	2.90279	137.424	9.74e-32	1.19e-29
GIT2	ENSG00000139436	1.33253	5.07684	46.7859	7.92e-12	9.21e-11
NFIC	ENSG00000141905	-0.145108	6.93065	1.3124	0.25196	0.357136
PFDN2	ENSG00000143256	-0.0983717	4.84139	0.544723	0.460482	0.571451
EFNA3	ENSG00000143590	2.48235	1.7073	57.4171	3.53e-14	5.41e-13
IGFBP3	ENSG00000146674	4.4249	11.1695	114.381	1.08e-26	7.48e-25
NCAM1	ENSG00000149294	0.795958	4.16706	1.95173	0.1624	0.251512
ABCB9	ENSG00000150967	0.049027	2.56042	0.0348233	0.851966	0.898362
GPD1L	ENSG00000152642	-1.83194	5.05665	58.9081	1.65e-14	2.65e-13
DDAH1	ENSG00000153904	-1.46186	7.20372	32.6064	1.13e-08	8.57e-08
CNTNAP5	ENSG00000155052	0.765481	0.747827	0.773785	0.379049	0.49298
KCNJ6	ENSG00000157542	-0.54824	-1.10224	0.93244	0.33423	0.446012
ZNF618	ENSG00000157657	-0.819338	5.40217	24.1385	8.96e-07	4.94e-06
KCNB1	ENSG00000158445	0.596873	2.15993	2.50042	0.113816	0.187705
ARHGAP35	ENSG00000160007	-0.343807	6.86733	7.55349	0.00598939	0.0149303
CLASP2	ENSG00000163539	-0.65066	5.25314	30.1847	3.93e-08	2.73e-07
NIPBL	ENSG00000164190	0.0913764	5.9562	0.673889	0.411699	0.525181
MYORG	ENSG00000164976	-2.28735	4.92795	72.8343	1.41e-17	3.34e-16
MID1IP1	ENSG00000165175	-0.383698	5.25612	3.51513	0.0608108	0.111108
PLK1	ENSG00000166851	1.9474	2.50908	46.6682	8.41e-12	9.74e-11
TBC1D16	ENSG00000167291	0.277163	6.75307	2.07104	0.150119	0.235948
SIN3A	ENSG00000169375	0.0791128	5.77214	0.501249	0.478952	0.589319
PKIA	ENSG00000171033	-0.12558	2.50568	0.102583	0.748752	0.821121
NPTX1	ENSG00000171246	-1.55963	2.64829	8.90337	0.00284645	0.00768007
ESCO2	ENSG00000171320	4.05288	0.602344	86.4888	1.41e-20	4.85e-19
DENND6A	ENSG00000174839	-0.081221	4.57411	0.356936	0.550213	0.654804
TP53I11	ENSG00000175274	1.29471	6.68206	35.3013	2.82e-09	2.33e-08
PTPN2	ENSG00000175354	0.514523	4.64233	13.8873	0.000194109	0.000684719
BNIP3	ENSG00000176171	1.08413	7.71623	17.7972	2.46e-05	0.000104477
KCMF1	ENSG00000176407	0.278641	5.51566	6.167	0.0130155	0.0296404
SLCO3A1	ENSG00000176463	0.877325	4.95155	12.1831	0.000482257	0.00155718
BDNF	ENSG00000176697	0.565003	1.75539	0.971561	0.324291	0.43551
DEAF1	ENSG00000177030	0.600398	5.41757	16.9975	3.74e-05	0.000153492
CHD9	ENSG00000177200	0.118721	6.06969	0.492746	0.482705	0.59274
MAF	ENSG00000178573	-0.589271	7.8805	5.42746	0.0198225	0.0427381
RCC2	ENSG00000179051	0.650078	6.17974	24.5058	7.41e-07	4.13e-06
SERTAD2	ENSG00000179833	1.00155	5.60943	33.8815	5.86e-09	4.64e-08
AIFM3	ENSG00000183773	0.0430594	1.24788	0.0204614	0.886256	0.922147
PPP1R2	ENSG00000184203	-0.0586725	5.43079	0.239255	0.624745	0.719614
CDK10	ENSG00000185324	-0.0855724	6.55992	0.486295	0.485585	0.59555
P4HB	ENSG00000185624	1.32272	9.4625	44.3951	2.68e-11	2.88e-10
INSIG1	ENSG00000186480	0.0605135	4.90026	0.115068	0.734446	0.809842
MITF	ENSG00000187098	-0.210102	5.31093	1.2819	0.257546	0.363209
PTAR1	ENSG00000188647	-0.284166	5.85137	2.98914	0.0838248	0.145333
NDUFA4	ENSG00000189043	-0.983682	6.91952	29.4907	5.62e-08	3.82e-07
PTPN1	ENSG00000196396	0.328955	6.16272	4.74024	0.029465	0.0602091
ATG7	ENSG00000197548	0.212206	4.4612	2.56778	0.10906	0.180944
PSAP	ENSG00000197746	0.489261	11.1914	8.20937	0.00416746	0.0108098
ZNF607	ENSG00000198182	0.0985331	2.9261	0.441155	0.506565	0.615092
SDHD	ENSG00000204370	-0.998977	6.25636	28.2164	1.08e-07	7.01e-07
CSNK1E	ENSG00000213923	1.06728	5.8375	41.8621	9.79e-11	9.84e-10
XIST	ENSG00000229807	0.304152	5.89496	0.160487	0.688708	0.771905

## Sheet: miR200c-3p_targets
Gene	ensembl_id	logFC	logCPM	LR	PValue	FDR
WNT16	ENSG00000002745	-1.01747	-1.73494	1.49012	0.222198	0.32279
M6PR	ENSG00000003056	0.53334	6.31588	17.8239	2.42e-05	0.000103254
PKD1	ENSG00000008710	0.497366	6.19471	14.845	0.00011672	0.000431169
HFE	ENSG00000010704	0.799574	4.51303	21.1316	4.29e-06	2.11e-05
MAMLD1	ENSG00000013619	0.270672	2.6221	1.20941	0.271448	0.37855
TIMP2	ENSG00000035862	0.135149	7.66962	0.369996	0.543007	0.648365
WDR37	ENSG00000047056	-0.00112751	4.81268	8.53e-05	0.992629	0.995251
DCBLD2	ENSG00000057019	0.333711	6.02351	1.26852	0.260045	0.366079
ELMO2	ENSG00000062598	-0.327558	5.17765	6.56875	0.0103785	0.0243018
UHRF1BP1	ENSG00000065060	0.483573	4.72962	9.16819	0.00246258	0.00674653
MYLK	ENSG00000065534	-0.0920708	7.62324	0.292364	0.58871	0.688274
RHOA	ENSG00000067560	0.0407116	8.47959	0.0961434	0.756508	0.827197
PRKCZ	ENSG00000067606	-1.25008	4.02386	46.0097	1.18e-11	1.33e-10
ACSL4	ENSG00000068366	-1.04949	6.27024	42.5617	6.85e-11	7e-10
CLEC2D	ENSG00000069493	1.82478	3.77727	40.4429	2.02e-10	1.95e-09
PABPC1	ENSG00000070756	0.644922	9.05175	18.0907	2.11e-05	9.07e-05
UBE2D1	ENSG00000072401	0.527559	4.0737	13.3967	0.000252073	0.000864559
KLHL20	ENSG00000076321	0.363976	4.4443	6.85894	0.00881987	0.0210546
N4BP2	ENSG00000078177	0.459939	3.36721	5.27906	0.0215834	0.0460628
MLLT10	ENSG00000078403	-0.178768	4.9826	1.62594	0.202266	0.299397
SESN1	ENSG00000080546	0.425007	4.73698	10.9038	0.000959672	0.00290435
OSTM1	ENSG00000081087	0.202974	5.44527	2.17795	0.140001	0.22283
CDC14B	ENSG00000081377	-0.895596	5.02466	37.4452	9.4e-10	8.26e-09
CCNT2	ENSG00000082258	0.198996	5.21454	1.28433	0.257096	0.362796
ZNF416	ENSG00000083817	0.0370281	2.00477	0.0258015	0.872386	0.912828
ATRX	ENSG00000085224	-0.0431192	6.18823	0.0885384	0.766044	0.833818
TXNDC16	ENSG00000087301	0.376687	3.64222	2.83512	0.0922238	0.157304
KLHL42	ENSG00000087448	-0.264648	4.63265	3.86386	0.0493368	0.0931623
PTPN4	ENSG00000088179	-0.584165	4.39167	10.1427	0.00144877	0.00419541
DNMT3B	ENSG00000088305	-0.183188	2.83923	0.356424	0.550499	0.65501
ZFHX4	ENSG00000091656	-0.217475	1.95221	0.157887	0.691109	0.77381
GEMIN2	ENSG00000092208	-0.0836677	2.32092	0.166837	0.682938	0.767501
FKBP5	ENSG00000096060	-0.261767	6.85268	0.625416	0.429042	0.542078
SIRT1	ENSG00000096717	0.148282	4.65158	1.11565	0.290857	0.399814
ERMP1	ENSG00000099219	-0.980776	5.69575	20.4179	6.22e-06	2.98e-05
MKNK2	ENSG00000099875	-0.108457	7.11211	0.49589	0.481312	0.591562
CRKL	ENSG00000099942	0.426317	6.22796	12.3928	0.000431	0.00140718
EP300	ENSG00000100393	0.116661	6.56447	0.625548	0.428993	0.542073
SEC23A	ENSG00000100934	0.328876	5.80032	3.904	0.0481713	0.0912666
RASSF2	ENSG00000101265	2.95577	5.68671	106.565	5.54e-25	3.15e-23
JAG1	ENSG00000101384	1.03121	7.45184	33.843	5.97e-09	4.72e-08
XIAP	ENSG00000101966	-0.113993	5.82043	0.67846	0.410117	0.523753
DNAJC3	ENSG00000102580	0.366492	6.46898	4.938	0.0262724	0.0546056
FLT1	ENSG00000102755	1.70392	8.46377	31.0963	2.46e-08	1.77e-07
VAC14	ENSG00000103043	-0.23311	5.71116	3.35625	0.0669505	0.120525
UBE2I	ENSG00000103275	0.564652	5.90148	14.6481	0.000129564	0.000474077
IKBKB	ENSG00000104365	0.305587	5.68546	7.33311	0.00676958	0.0166334
TRPS1	ENSG00000104447	-0.721916	4.27843	12.7894	0.000348581	0.00115933
DNAJB6	ENSG00000105993	0.0283694	6.29691	0.0504074	0.822356	0.876841
HOXA5	ENSG00000106004	-0.941356	3.90471	16.2854	5.45e-05	0.0002156
CASP2	ENSG00000106144	0.746852	4.83341	25.0293	5.65e-07	3.22e-06
PTPRZ1	ENSG00000106278	-2.74832	-0.974344	9.60396	0.00194159	0.00547331
PHF14	ENSG00000106443	0.45359	5.005	14.289	0.000156782	0.000563084
GLI3	ENSG00000106571	-1.05721	3.31861	16.916	3.91e-05	0.000159633
ELAVL2	ENSG00000107105	-0.05494	0.393691	0.0156684	0.900386	0.932145
SH3PXD2A	ENSG00000107957	0.872133	6.06849	19.4238	1.05e-05	4.81e-05
SHOC2	ENSG00000108061	0.0783062	5.39055	0.394068	0.530169	0.636708
NUFIP2	ENSG00000108256	0.3117	6.41744	5.09252	0.0240293	0.0505285
RPS6KB1	ENSG00000108443	0.41906	4.83717	13.3584	0.000257272	0.000880552
SLC1A2	ENSG00000110436	-0.13888	-0.0626838	0.0451514	0.831726	0.883853
PPM1H	ENSG00000111110	-1.74187	4.39723	33.9538	5.64e-09	4.48e-08
ARPC3	ENSG00000111229	0.460082	7.06995	13.7775	0.00020579	0.000721966
CDKN1B	ENSG00000111276	0.412844	6.01116	7.76348	0.00533131	0.0134608
TPD52L1	ENSG00000111907	-1.07263	3.82351	13.621	0.000223666	0.000778193
E2F3	ENSG00000112242	-0.0815573	4.23693	0.225986	0.634516	0.728009
QKI	ENSG00000112531	0.571525	7.00378	15.6495	7.62e-05	0.000292916
VEGFA	ENSG00000112715	2.73031	10.726	78.295	8.87e-19	2.46e-17
ERBIN	ENSG00000112851	-0.180599	6.50283	1.76831	0.183591	0.27752
LMNB1	ENSG00000113368	2.19545	4.0602	123.04	1.37e-28	1.27e-26
SEC24A	ENSG00000113615	0.703165	5.35715	12.1525	0.000490218	0.00158002
PDCD10	ENSG00000114209	0.0849043	4.63244	0.533632	0.465084	0.575962
BBX	ENSG00000114439	-0.532993	5.97807	13.2393	0.000274137	0.000932775
ACVR2B	ENSG00000114739	-0.49725	3.55961	8.40851	0.00373468	0.00979254
INO80D	ENSG00000114933	0.0477537	4.60439	0.0931523	0.760207	0.829915
NRBP1	ENSG00000115216	0.249462	6.48938	4.19758	0.0404817	0.0787795
FN1	ENSG00000115414	3.17422	11.0539	48.9077	2.68e-12	3.28e-11
WIPF1	ENSG00000115935	1.17888	6.47498	63.913	1.3e-15	2.41e-14
RND3	ENSG00000115963	1.25622	5.30869	27.6992	1.42e-07	8.98e-07
ERRFI1	ENSG00000116285	-0.245981	7.49663	0.482511	0.487287	0.597258
LEPR	ENSG00000116678	0.437575	4.14314	5.77982	0.0162112	0.0359115
RCOR3	ENSG00000117625	-0.0479538	5.37325	0.0974986	0.754852	0.825933
CAMSAP2	ENSG00000118200	0.501144	5.55666	10.713	0.00106383	0.0031871
MYB	ENSG00000118513	3.2801	-0.460926	17.6011	2.72e-05	0.00011471
KLF9	ENSG00000119138	-0.715491	6.60832	11.2929	0.000778054	0.00240595
DNMT3A	ENSG00000119772	0.330628	5.04475	7.97075	0.00475393	0.01215
GOT1	ENSG00000120053	-1.44683	6.56643	25.4786	4.47e-07	2.61e-06
HOXB5	ENSG00000120075	-2.18077	2.23464	34.2107	4.95e-09	3.96e-08
DUSP1	ENSG00000120129	0.868348	9.84907	6.01502	0.0141846	0.0319757
RNF2	ENSG00000121481	0.488101	4.18882	8.61608	0.00333207	0.0088491
SEPT7	ENSG00000122545	0.657538	7.24396	28.4083	9.82e-08	6.4e-07
RASSF8	ENSG00000123094	-1.43585	4.83804	63.2647	1.81e-15	3.28e-14
CDK2	ENSG00000123374	0.737902	4.03079	23.9374	9.95e-07	5.43e-06
RAP2C	ENSG00000123728	-0.152907	4.98017	1.09934	0.294412	0.403748
PARD6B	ENSG00000124171	-1.08748	4.85004	31.0093	2.57e-08	1.85e-07
PLCG1	ENSG00000124181	0.142961	6.38232	1.23173	0.267071	0.373684
STX16	ENSG00000124222	0.400277	6.10433	8.73933	0.00311418	0.00832678
USP22	ENSG00000124422	-0.199091	7.10308	2.0468	0.152526	0.239034
YEATS4	ENSG00000127337	-0.0593347	3.24203	0.149911	0.69862	0.780258
PIN1	ENSG00000127445	-0.0309757	5.41304	0.0593086	0.807592	0.865203
KDR	ENSG00000128052	0.863756	7.67515	7.76852	0.00531647	0.0134295
DNAJB9	ENSG00000128590	0.0268898	6.26458	0.0137207	0.906753	0.936656
ILF3	ENSG00000129351	0.196182	7.6864	3.1973	0.0737601	0.130581
ATP6V1E1	ENSG00000131100	-0.433591	7.02848	7.38302	0.00658426	0.0162384
RIN2	ENSG00000132669	0.304513	6.13997	4.49629	0.0339685	0.0679253
KRAS	ENSG00000133703	0.118471	5.08849	0.666736	0.414192	0.527634
ROCK2	ENSG00000134318	0.146387	5.90909	1.26827	0.260091	0.366084
RTL8C	ENSG00000134590	0.078274	6.45852	0.213024	0.644408	0.736366
ETS1	ENSG00000134954	1.01659	7.69822	29.9991	4.32e-08	2.99e-07
UBQLN1	ENSG00000135018	-0.338508	6.69272	6.67236	0.00979192	0.02308
PRRG4	ENSG00000135378	-0.21023	4.88543	0.704465	0.401287	0.515035
CAB39	ENSG00000135932	-0.424499	6.4141	6.17862	0.0129303	0.0294724
KIF13A	ENSG00000137177	-0.0277349	5.59721	0.0365261	0.848433	0.895677
TJAP1	ENSG00000137221	0.204884	5.10413	2.32493	0.127316	0.206094
TUBB2A	ENSG00000137267	-1.37408	3.64928	38.7368	4.85e-10	4.45e-09
ABI2	ENSG00000138443	-0.389792	5.71409	9.71451	0.00182819	0.00518458
SECISBP2L	ENSG00000138593	-0.314063	6.14502	3.79341	0.0514547	0.0966144
FBLN5	ENSG00000140092	-2.69872	6.16492	51.6937	6.49e-13	8.61e-12
NCOA2	ENSG00000140396	-0.190807	5.76144	1.07869	0.29899	0.408545
CYP1A1	ENSG00000140465	-3.29744	-1.73892	11.7925	0.000594686	0.00188732
CDH11	ENSG00000140937	0.854994	5.40603	8.2947	0.0039761	0.0103634
PDPK1	ENSG00000140992	-0.452962	5.38108	9.35328	0.00222587	0.0061851
GATA6	ENSG00000141448	-0.480853	2.26105	1.78078	0.182054	0.27588
ARHGDIA	ENSG00000141522	0.154012	7.08807	1.34748	0.245719	0.350284
PMAIP1	ENSG00000141682	0.684902	2.158	2.69063	0.10094	0.169598
CACNG8	ENSG00000142408	3.49308	0.233094	26.215	3.05e-07	1.83e-06
OSR1	ENSG00000143867	0.0278983	1.24028	0.00802981	0.928598	0.952579
ABT1	ENSG00000146109	0.50124	4.54264	18.8683	1.4e-05	6.26e-05
PPP1R18	ENSG00000146112	1.80221	6.42445	68.8509	1.06e-16	2.25e-15
NLGN4X	ENSG00000146938	0.443744	1.58238	0.781923	0.376554	0.49059
MSN	ENSG00000147065	0.324101	9.2005	5.14294	0.0233411	0.0492559
MTDH	ENSG00000147649	0.653817	6.93278	21.0085	4.57e-06	2.24e-05
NTRK2	ENSG00000148053	-1.39058	5.15731	15.4517	8.46e-05	0.000322015
NOTCH1	ENSG00000148400	0.417945	6.69063	4.61925	0.031615	0.0638978
ZEB1	ENSG00000148516	0.508052	5.4676	7.44118	0.00637483	0.0157756
TCF7L2	ENSG00000148737	0.101226	4.61596	0.665996	0.414451	0.527877
ADAM12	ENSG00000148848	2.71303	4.42336	35.7876	2.2e-09	1.84e-08
CELF1	ENSG00000149187	-0.0980243	6.53526	0.779298	0.377356	0.491331
SERPINH1	ENSG00000149257	1.48552	7.82077	56.1066	6.86e-14	1.02e-12
NCAM1	ENSG00000149294	0.795958	4.16706	1.95173	0.1624	0.251512
FOXO1	ENSG00000150907	-0.642142	4.87471	8.41406	0.0037233	0.00976823
EDNRA	ENSG00000151617	1.13681	4.79482	16.76	4.24e-05	0.000172
TCF7L1	ENSG00000152284	-0.472819	4.20262	3.89979	0.0482921	0.0914281
BCL2L11	ENSG00000153094	0.0528165	4.73632	0.0952195	0.757644	0.827871
PTPRD	ENSG00000153707	-4.35863	5.29	57.1146	4.11e-14	6.26e-13
JAZF1	ENSG00000153814	1.26475	3.93231	37.9945	7.09e-10	6.34e-09
ELOC	ENSG00000154582	0.0221341	5.11657	0.0252197	0.873821	0.913764
C21orf91	ENSG00000154642	-0.223126	3.65588	1.56866	0.210402	0.309151
USP25	ENSG00000155313	0.0715557	5.37016	0.187992	0.664593	0.753188
PSD3	ENSG00000156011	-0.218898	3.32105	0.466741	0.49449	0.60385
BAG4	ENSG00000156735	-0.379112	4.05722	4.77694	0.0288433	0.059116
SHC1	ENSG00000160691	1.28844	6.94948	50.0259	1.52e-12	1.92e-11
CLPB	ENSG00000162129	-0.727678	4.47946	26.1977	3.08e-07	1.85e-06
PTPN13	ENSG00000163629	-1.55745	5.72377	48.1279	3.99e-12	4.78e-11
BAP1	ENSG00000163930	-0.875394	6.0609	30.8698	2.76e-08	1.98e-07
MFSD8	ENSG00000164073	0.174315	4.15912	1.1908	0.275168	0.382746
ANKRD33B	ENSG00000164236	0.269411	5.84182	0.744591	0.388194	0.502073
GPX8	ENSG00000164294	1.68807	4.92504	36.0083	1.96e-09	1.66e-08
DLC1	ENSG00000164741	0.0421537	6.04799	0.0405276	0.840452	0.889765
NOS3	ENSG00000164867	0.692924	4.56315	7.59529	0.0058521	0.014618
TP53INP1	ENSG00000164938	0.656115	6.044	9.30675	0.00228311	0.00631764
CFL2	ENSG00000165410	-0.521881	4.98713	10.2342	0.00137859	0.00400922
TAF1D	ENSG00000166012	0.786685	5.47102	33.9642	5.61e-09	4.46e-08
AVPR1A	ENSG00000166148	-0.940758	3.74287	6.98677	0.00821143	0.0197836
BRD7	ENSG00000166164	-0.0954387	5.56204	0.422833	0.515527	0.623424
FRS2	ENSG00000166225	0.203624	4.52241	1.58391	0.208198	0.306513
MAPK7	ENSG00000166484	0.512234	4.40295	10.1121	0.00147302	0.0042571
IGF2	ENSG00000167244	-1.36742	4.15989	7.38588	0.00657381	0.016216
DDIT4	ENSG00000168209	2.75823	7.12517	71.9321	2.23e-17	5.12e-16
BMI1	ENSG00000168283	0.22253	4.9413	1.56139	0.211461	0.310331
LRP1B	ENSG00000168702	-3.39443	0.0557863	67.0431	2.66e-16	5.34e-15
SHOX2	ENSG00000168779	2.46982	-0.371295	12.6612	0.000373322	0.00123435
IRS1	ENSG00000169047	-0.534348	4.51149	2.4312	0.118942	0.194675
EFNA1	ENSG00000169242	0.895505	6.59547	13.4674	0.000242744	0.00083628
ZEB2	ENSG00000169554	0.914019	6.69158	20.0673	7.48e-06	3.52e-05
TRIM56	ENSG00000169871	0.602827	6.69298	19.4973	1.01e-05	4.65e-05
ZFPM2	ENSG00000169946	0.527242	2.14236	2.86924	0.0902873	0.154582
DENND5B	ENSG00000170456	-0.486429	4.72308	3.19163	0.0740164	0.130995
CDCA4	ENSG00000170779	0.924782	2.83955	17.9277	2.29e-05	9.81e-05
SHCBP1	ENSG00000171241	-0.269956	2.6027	0.932031	0.334336	0.446076
BCL2	ENSG00000171791	0.743267	6.14819	7.94267	0.00482826	0.0123101
PTEN	ENSG00000171862	0.168739	6.59284	1.73461	0.187824	0.282215
ZNF217	ENSG00000171940	0.48341	5.56535	12.4291	0.000422693	0.00138239
KLF11	ENSG00000172059	0.387414	5.40789	4.69268	0.0302914	0.0616205
MALT1	ENSG00000172175	0.59756	5.67688	9.75901	0.00178446	0.00507672
ZMAT3	ENSG00000172667	0.772925	5.39772	27.3226	1.72e-07	1.08e-06
ZNF621	ENSG00000172888	-0.125611	4.43936	0.747335	0.387321	0.501318
BTC	ENSG00000174808	-1.55013	1.8048	15.762	7.18e-05	0.000277289
CCNE2	ENSG00000175305	1.57915	0.680553	25.777	3.83e-07	2.25e-06
TMEM70	ENSG00000175606	0.292065	4.52184	2.12547	0.144869	0.229236
UNC119B	ENSG00000175970	-0.0808039	6.01943	0.346808	0.555926	0.659468
CRLF3	ENSG00000176390	1.1387	3.77888	47.6751	5.03e-12	5.95e-11
JUN	ENSG00000177606	0.164425	8.94433	0.372857	0.541451	0.647003
SUZ12	ENSG00000178691	0.0690359	5.0832	0.320396	0.57137	0.673099
ZFPM1	ENSG00000179588	0.358397	3.08619	2.8596	0.0908302	0.155385
PAK2	ENSG00000180370	0.545392	6.57135	18.6492	1.57e-05	6.95e-05
NGRN	ENSG00000182768	-0.14853	4.70971	1.62518	0.20237	0.299514
TMEM119	ENSG00000183160	0.152729	3.63667	0.141366	0.706927	0.787106
NOG	ENSG00000183691	1.06042	1.72778	2.41072	0.120507	0.196805
TBK1	ENSG00000183735	0.450481	4.8185	13.934	0.000189344	0.000669132
SP1	ENSG00000185591	0.386702	6.92543	9.12994	0.00251461	0.00687199
NTF3	ENSG00000185652	-1.22514	1.11463	13.8475	0.000198258	0.000698502
GPATCH8	ENSG00000186566	0.225171	5.69014	3.93327	0.0473397	0.0898748
TUBB	ENSG00000196230	1.19608	8.46894	41.7548	1.03e-10	1.04e-09
FLNA	ENSG00000196924	1.13381	9.81127	29.3397	6.07e-08	4.1e-07
LPAR1	ENSG00000198121	0.0717468	3.23399	0.0606699	0.80544	0.863797
MBD5	ENSG00000204406	0.113495	4.40961	0.615278	0.432807	0.545529
C6orf47	ENSG00000204439	-0.0682653	4.50867	0.216008	0.642099	0.734452
MALAT1	ENSG00000251562	-0.77116	8.46871	11.555	0.000675678	0.00211852
TUBB3	ENSG00000258947	2.06287	-0.432413	12.4264	0.000423309	0.00138421
HNF1B	ENSG00000275410	-0.542713	6.92779	8.28139	0.00400535	0.0104314

## Sheet: miR362-5p_targets
Gene	ensembl_id	logFC	logCPM	LR	PValue	FDR
HCCS	ENSG00000004961	-0.261606	4.31346	1.76659	0.183805	0.277771
GPRC5A	ENSG00000013588	-1.51014	3.96123	9.80166	0.00174355	0.00497377
QSER1	ENSG00000060749	0.515548	5.0147	10.8251	0.00100133	0.00301898
CASP8	ENSG00000064012	0.720781	5.03969	19.0908	1.25e-05	5.65e-05
HSP90AA1	ENSG00000080824	-0.890272	9.30584	35.23	2.93e-09	2.41e-08
CYLD	ENSG00000083799	0.622494	5.9237	25.0839	5.49e-07	3.14e-06
ERGIC2	ENSG00000087502	0.606904	4.88645	17.5783	2.76e-05	0.000115943
CERS4	ENSG00000090661	-0.812999	5.35261	14.8464	0.000116629	0.000430969
IKZF5	ENSG00000095574	-0.173527	4.30083	1.33975	0.247079	0.35178
NOMO3	ENSG00000103226	0.0594349	2.55463	0.09071	0.763277	0.831888
VPS18	ENSG00000104142	-0.264467	5.22123	4.04508	0.0443003	0.0849752
RPS6KB1	ENSG00000108443	0.41906	4.83717	13.3584	0.000257272	0.000880552
POLR3G	ENSG00000113356	0.728412	1.37336	4.94392	0.0261827	0.0544533
SRSF7	ENSG00000115875	0.139321	6.41369	1.17914	0.277531	0.385038
IVNS1ABP	ENSG00000116679	0.0110167	8.69624	0.00253449	0.959848	0.973681
CDK2	ENSG00000123374	0.737902	4.03079	23.9374	9.95e-07	5.43e-06
SIX1	ENSG00000126778	2.67343	0.716663	26.5742	2.54e-07	1.54e-06
PLEKHG3	ENSG00000126822	-0.986881	5.77041	24.4906	7.47e-07	4.16e-06
CCNT1	ENSG00000129315	0.229675	5.11528	3.33163	0.0679593	0.121981
MTUS1	ENSG00000129422	-0.429513	5.60529	6.67481	0.00977847	0.0230577
PIK3C2B	ENSG00000133056	0.600788	5.24924	11.467	0.000708437	0.00221165
FAM104A	ENSG00000133193	0.638638	3.46707	14.0451	0.000178479	0.000633541
PRRG4	ENSG00000135378	-0.21023	4.88543	0.704465	0.401287	0.515035
OS9	ENSG00000135506	0.264624	8.02859	3.97404	0.0462069	0.0880779
C16orf58	ENSG00000140688	-0.0413758	5.33477	0.0741517	0.785385	0.848437
NPEPPS	ENSG00000141279	0.187327	6.28343	2.68821	0.101093	0.169794
ASGR1	ENSG00000141505	0.674778	0.993187	3.14862	0.0759913	0.133879
KCNN3	ENSG00000143603	1.24358	4.6219	26.1665	3.13e-07	1.88e-06
GDF7	ENSG00000143869	-2.52823	3.50493	113.795	1.44e-26	9.84e-25
TMF1	ENSG00000144747	0.0465219	5.1239	0.0828572	0.773462	0.839512
DCDC2	ENSG00000146038	-0.986603	5.20924	6.17206	0.0129783	0.0295724
FAXC	ENSG00000146267	-3.75392	0.146737	33.1566	8.5e-09	6.6e-08
SSRP1	ENSG00000149136	0.469068	6.55302	13.4137	0.000249795	0.00085751
CHD1	ENSG00000153922	0.239634	5.35789	3.50676	0.0611187	0.111606
ANKRD40	ENSG00000154945	0.31073	5.38185	5.46631	0.0193865	0.0419151
SPATA2	ENSG00000158480	-0.179113	4.0304	1.51772	0.217964	0.31784
OMA1	ENSG00000162600	-0.785639	3.55747	35.0752	3.17e-09	2.6e-08
ZNF326	ENSG00000162664	-0.407372	4.62427	9.6957	0.001847	0.00523151
DCLK3	ENSG00000163673	3.45561	0.468239	30.5106	3.32e-08	2.34e-07
RICTOR	ENSG00000164327	0.0471597	5.18127	0.127816	0.720707	0.798991
KCNK5	ENSG00000164626	-2.29475	5.85902	29.9371	4.46e-08	3.08e-07
PRDX3	ENSG00000165672	-0.841495	7.47316	33.8805	5.86e-09	4.64e-08
BORCS5	ENSG00000165714	-0.455196	2.80908	7.33704	0.0067548	0.0166024
PPIC	ENSG00000168938	0.0352726	4.27724	0.0418316	0.837941	0.888062
ZNF747	ENSG00000169955	0.149553	3.54728	0.813186	0.36718	0.48092
LONRF2	ENSG00000170500	-1.87807	2.7574	14.9785	0.000108741	0.000404858
SLC35G1	ENSG00000176273	0.370896	2.0177	2.78492	0.0951555	0.161342
HHIPL1	ENSG00000182218	1.22148	1.88678	12.6064	0.000384421	0.00126779
NTM	ENSG00000182667	2.29403	3.43756	13.5549	0.000231684	0.000803196
EWSR1	ENSG00000182944	-0.134559	7.44694	1.5729	0.209786	0.308478
DAZAP2	ENSG00000183283	-0.367479	8.14459	8.2737	0.00402234	0.0104695
SFXN4	ENSG00000183605	-0.275487	4.67494	2.3836	0.122614	0.199796
EFNA5	ENSG00000184349	0.325726	4.47187	0.595156	0.440432	0.553
SP140L	ENSG00000185404	1.39354	4.15558	56.4465	5.77e-14	8.63e-13
LYPD6	ENSG00000187123	-2.67401	0.16062	45.1785	1.8e-11	1.98e-10
ZBTB44	ENSG00000196323	-0.362911	6.16431	4.40285	0.0358789	0.0711921
TECPR2	ENSG00000196663	-0.515365	4.78561	13.3478	0.00025872	0.000884736
ZBTB10	ENSG00000205189	-0.363273	4.87888	5.79125	0.0161061	0.0357232
ZNF585B	ENSG00000245680	-0.0711823	3.94028	0.294424	0.587399	0.687297

## Sheet: miR363-3p_targets
Gene	ensembl_id	logFC	logCPM	LR	PValue	FDR
MYLIP	ENSG00000007944	-0.0802054	5.56422	0.197119	0.657057	0.747207
REV3L	ENSG00000009413	0.264963	4.66071	2.24155	0.134346	0.215277
ELOA	ENSG00000011007	0.0741103	5.16061	0.373504	0.5411	0.646818
B4GALT7	ENSG00000027847	0.425045	5.12442	11.2268	0.00080625	0.00248485
ARNTL2	ENSG00000029153	2.3531	2.99142	48.8314	2.79e-12	3.41e-11
BAK1	ENSG00000030110	0.504229	4.34224	13.2966	0.000265883	0.00090642
ABCF2	ENSG00000033050	-0.250577	3.77299	2.36422	0.124146	0.201809
HOXC8	ENSG00000037965	-0.206814	1.94751	0.648667	0.42059	0.534021
PHLPP2	ENSG00000040199	-0.20379	3.74353	1.12642	0.288541	0.397338
USP28	ENSG00000048028	0.12645	4.21558	0.577712	0.44721	0.559267
ARID1B	ENSG00000049618	-0.262153	5.93205	5.22678	0.0222417	0.0472979
POLQ	ENSG00000051341	2.0063	1.16204	32.2179	1.38e-08	1.03e-07
MCF2L2	ENSG00000053524	-0.27922	-0.13766	0.283855	0.594185	0.693136
SZRD1	ENSG00000055070	0.0762005	6.56912	0.305988	0.580153	0.680848
BCAT1	ENSG00000060982	1.95274	4.75239	61.8752	3.66e-15	6.37e-14
MED29	ENSG00000063322	-0.0858404	6.20445	0.47529	0.490563	0.600257
RNF4	ENSG00000063978	0.266201	5.86136	5.67461	0.0172122	0.0377856
UHRF1BP1	ENSG00000065060	0.483573	4.72962	9.16819	0.00246258	0.00674653
TRAM2	ENSG00000065308	0.69961	5.65263	7.05698	0.00789569	0.0190924
MAP2K4	ENSG00000065559	-0.0873927	4.97477	0.405984	0.524015	0.630987
NUCKS1	ENSG00000069275	0.0645748	7.91194	0.221098	0.638204	0.731163
EXOC5	ENSG00000070367	0.0417773	5.65795	0.0725887	0.787604	0.8502
GRAMD4	ENSG00000075240	1.27081	6.30932	51.0546	8.98e-13	1.18e-11
RBMS2	ENSG00000076067	0.383607	6.11477	4.18993	0.0406648	0.0790694
CAPZB	ENSG00000077549	0.197099	7.4395	2.59066	0.107496	0.178738
CIC	ENSG00000079432	0.431635	6.7399	13.4337	0.000247142	0.000849282
CNOT4	ENSG00000080802	-0.00918285	4.47488	0.00571872	0.93972	0.960287
RSBN1	ENSG00000081019	0.218091	4.59954	1.9068	0.16732	0.257872
ZNF264	ENSG00000083844	0.140224	4.72597	1.54099	0.214471	0.313832
TXLNA	ENSG00000084652	0.187751	6.19818	2.45977	0.116796	0.1919
AGBL5	ENSG00000084693	-0.138556	5.30716	0.831286	0.361901	0.47527
CAD	ENSG00000084774	0.631647	5.46116	16.4555	4.98e-05	0.000198792
RRN3	ENSG00000085721	0.340756	5.23391	5.08237	0.0241703	0.0507928
ERGIC2	ENSG00000087502	0.606904	4.88645	17.5783	2.76e-05	0.000115943
AURKA	ENSG00000087586	1.00804	2.66789	18.2129	1.98e-05	8.55e-05
FKBP1A	ENSG00000088832	0.835844	7.57423	36.805	1.31e-09	1.12e-08
GOLGA3	ENSG00000090615	0.544402	6.14448	19.3478	1.09e-05	4.99e-05
RBM27	ENSG00000091009	0.153001	4.08073	0.948884	0.330003	0.441619
G2E3	ENSG00000092140	0.0515368	3.50537	0.11194	0.737946	0.812618
GEMIN2	ENSG00000092208	-0.0836677	2.32092	0.166837	0.682938	0.767501
HIVEP1	ENSG00000095951	0.263134	4.33168	3.94425	0.0470318	0.0893635
CDC5L	ENSG00000096401	0.283431	5.35076	7.01733	0.00807243	0.0194873
MKNK2	ENSG00000099875	-0.108457	7.11211	0.49589	0.481312	0.591562
SNRPD3	ENSG00000100028	-0.305661	5.82356	6.43359	0.0111982	0.0260108
RBFOX2	ENSG00000100320	0.387572	6.35959	7.85542	0.00506687	0.012859
CNIH1	ENSG00000100528	-0.101561	5.90174	0.491965	0.483052	0.59304
ZFYVE21	ENSG00000100711	-0.457189	4.65002	6.13506	0.0132527	0.0301153
NKAP	ENSG00000101882	0.0694343	3.8195	0.243834	0.62145	0.716782
CCDC113	ENSG00000103021	0.0726406	1.69992	0.062592	0.802445	0.861642
ESRP1	ENSG00000104413	-6.21435	2.38852	53.7857	2.24e-13	3.13e-12
SLC39A14	ENSG00000104635	1.50427	7.79132	38.0545	6.88e-10	6.17e-09
PPP1R37	ENSG00000104866	0.414914	6.18121	7.27952	0.00697453	0.0170772
CYTH2	ENSG00000105443	-0.137167	5.84769	1.47545	0.224487	0.325324
RAB3D	ENSG00000105514	1.18588	4.1703	35.5207	2.52e-09	2.1e-08
ITGB8	ENSG00000105855	-0.164743	6.95608	0.152536	0.696124	0.778032
HOXA13	ENSG00000106031	0.632063	-0.189724	0.684995	0.407872	0.521419
WASL	ENSG00000106299	-0.429761	6.38823	5.97858	0.0144806	0.032569
RBM28	ENSG00000106344	0.00198017	4.6225	0.000246256	0.98748	0.992023
PLEKHA1	ENSG00000107679	0.421587	6.75905	3.63107	0.0567102	0.104929
CCSER2	ENSG00000107771	0.081004	5.43939	0.386251	0.534277	0.640612
BMPR1A	ENSG00000107779	-0.0383136	4.66268	0.111164	0.738823	0.813274
CPEB3	ENSG00000107864	-0.915934	3.22328	16.2532	5.54e-05	0.000219109
NUFIP2	ENSG00000108256	0.3117	6.41744	5.09252	0.0240293	0.0505285
AKAP10	ENSG00000108599	0.221036	4.94345	3.45136	0.0631998	0.1148
C17orf75	ENSG00000108666	-0.564044	4.18551	16.9091	3.92e-05	0.000160103
EFTUD2	ENSG00000108883	0.287542	6.19929	5.75837	0.0164103	0.0362728
TMEM33	ENSG00000109133	-0.296964	5.59676	2.20723	0.137365	0.21928
GALNT7	ENSG00000109586	0.352116	4.11469	2.2932	0.129941	0.209509
FBXW7	ENSG00000109670	0.451902	4.18169	8.61541	0.00333331	0.00885136
UGDH	ENSG00000109814	-0.0265997	5.67398	0.0185741	0.891595	0.926148
SH2B3	ENSG00000111252	1.49892	6.42874	68.4276	1.32e-16	2.76e-15
CNOT2	ENSG00000111596	0.322616	5.66524	8.84124	0.00294498	0.0079155
SASH1	ENSG00000111961	0.287172	5.99504	2.48116	0.115217	0.189665
TXNDC15	ENSG00000113621	0.392973	6.07253	6.79409	0.00914602	0.0217358
CPEB4	ENSG00000113742	-0.982233	6.3567	26.23	3.03e-07	1.82e-06
SLC25A36	ENSG00000114120	-0.350101	6.36577	6.04266	0.0139642	0.0315403
RPL24	ENSG00000114391	0.134364	8.55956	0.741585	0.389154	0.503003
GGCX	ENSG00000115486	-0.154245	5.68554	0.914189	0.339005	0.451054
PNO1	ENSG00000115946	0.538974	3.93657	10.9315	0.00094545	0.00286843
KCNC4	ENSG00000116396	-0.724327	4.52657	8.92027	0.00282023	0.00761642
AGMAT	ENSG00000116771	-3.99631	6.78016	74.3404	6.57e-18	1.64e-16
FASLG	ENSG00000117560	3.21985	1.66131	57.8224	2.87e-14	4.44e-13
CREB1	ENSG00000118260	0.389983	5.26952	10.7899	0.00102056	0.00307096
CYP20A1	ENSG00000119004	-0.778553	3.35864	26.5435	2.58e-07	1.56e-06
FBXW2	ENSG00000119402	-0.164757	5.93765	1.91743	0.166141	0.256436
VPS4B	ENSG00000119541	0.0805669	5.64262	0.297476	0.585469	0.68542
SUPT7L	ENSG00000119760	0.154137	5.48034	1.27721	0.258418	0.364305
YIPF4	ENSG00000119820	-0.179044	5.71314	1.46229	0.226567	0.327866
NUP43	ENSG00000120253	-0.0186433	4.68972	0.025215	0.873833	0.913764
NFYB	ENSG00000120837	-0.0764578	4.81211	0.294735	0.587202	0.687171
LAX1	ENSG00000122188	2.62191	1.77703	24.9982	5.74e-07	3.27e-06
FKBP9	ENSG00000122642	0.818563	7.01934	35.4265	2.65e-09	2.19e-08
SMU1	ENSG00000122692	-0.165966	5.74538	1.37856	0.240346	0.343831
CLTA	ENSG00000122705	-0.346216	6.77537	4.37657	0.0364362	0.0721491
AMD1	ENSG00000123505	0.05681	6.43712	0.152827	0.695848	0.777799
BAZ2B	ENSG00000123636	-0.179463	4.95595	0.984919	0.320987	0.43195
SLC12A5	ENSG00000124140	1.79585	0.418666	10.8149	0.00100688	0.00303413
PARD6B	ENSG00000124171	-1.08748	4.85004	31.0093	2.57e-08	1.85e-07
PMEPA1	ENSG00000124225	1.44195	6.71675	37.9383	7.3e-10	6.51e-09
CDKN1A	ENSG00000124762	2.00447	7.22673	67.2416	2.4e-16	4.86e-15
SOX4	ENSG00000124766	0.664038	6.17706	7.84331	0.00510093	0.0129355
RPL23	ENSG00000125691	0.402748	8.90922	7.27443	0.00699429	0.0171183
OPA3	ENSG00000125741	-0.407623	5.36118	11.5235	0.000687206	0.00215087
EIF2S2	ENSG00000125977	0.302277	5.99003	5.15048	0.0232399	0.0490781
BCL11B	ENSG00000127152	2.21651	2.86873	32.0835	1.48e-08	1.1e-07
HP1BP3	ENSG00000127483	-0.168182	7.25271	1.89216	0.168958	0.259896
APOBEC3F	ENSG00000128394	1.10451	2.75005	29.6987	5.05e-08	3.46e-07
DNAJB9	ENSG00000128590	0.0268898	6.26458	0.0137207	0.906753	0.936656
KLHDC10	ENSG00000128607	0.322575	6.37093	4.0347	0.0445736	0.0854146
MYO1B	ENSG00000128641	0.275676	6.68912	1.88231	0.170072	0.261297
SPCS3	ENSG00000129128	0.650671	6.83695	19.4858	1.01e-05	4.67e-05
TULP4	ENSG00000130338	-0.19935	4.66574	1.97255	0.160178	0.248736
PGPEP1	ENSG00000130517	-1.55457	6.66656	42.7218	6.31e-11	6.49e-10
PRRC2B	ENSG00000130723	-0.0335003	7.13053	0.053479	0.817117	0.8725
ZNF317	ENSG00000130803	0.221244	4.75627	3.00183	0.0831707	0.144437
PLXNA3	ENSG00000130827	1.49125	5.4967	68.492	1.27e-16	2.67e-15
RLIM	ENSG00000131263	0.0768397	5.54611	0.33144	0.564812	0.667105
GFPT2	ENSG00000131459	1.53445	3.9056	26.6059	2.49e-07	1.52e-06
MAP1B	ENSG00000131711	1.27645	5.90846	30.4798	3.37e-08	2.38e-07
PER2	ENSG00000132326	0.726254	4.94198	17.8143	2.44e-05	0.000103696
CARD6	ENSG00000132357	0.579963	3.6038	5.74392	0.0165458	0.036527
H3F3B	ENSG00000132475	0.334853	8.54979	5.24174	0.0220512	0.0469574
PCBD2	ENSG00000132570	0.120239	3.50286	0.312939	0.575882	0.677276
PPP1R3D	ENSG00000132825	-0.10346	3.34033	0.639417	0.423922	0.53731
FOPNL	ENSG00000133393	0.390669	4.98493	7.65376	0.00566542	0.0142083
ZFC3H1	ENSG00000133858	0.321196	5.27115	3.04944	0.080765	0.140925
MRO	ENSG00000134042	-3.86385	4.63647	73.8599	8.39e-18	2.06e-16
CCNB1	ENSG00000134057	1.14378	3.52993	38.5387	5.37e-10	4.9e-09
CD180	ENSG00000134061	3.20193	3.26709	144.31	3.04e-33	4.4e-31
EDEM1	ENSG00000134109	0.392543	5.84515	6.7233	0.00951614	0.0225194
IL6ST	ENSG00000134352	0.0450808	7.91564	0.0836782	0.772373	0.838763
PRRG4	ENSG00000135378	-0.21023	4.88543	0.704465	0.401287	0.515035
TSPAN31	ENSG00000135452	0.183305	5.15299	1.98548	0.158814	0.247065
MDM2	ENSG00000135679	1.14549	6.2483	43.0549	5.32e-11	5.55e-10
DYNC1LI2	ENSG00000135720	-0.000986497	6.35741	3.04e-05	0.9956	0.996891
FAM129A	ENSG00000135842	1.72857	5.36081	53.9161	2.09e-13	2.94e-12
TANK	ENSG00000136560	0.554303	4.98368	15.1899	9.72e-05	0.0003651
TOR1B	ENSG00000136816	0.449077	4.69586	10.7797	0.00102617	0.00308624
RANBP6	ENSG00000137040	-0.477024	4.68776	13.8392	0.000199141	0.000701154
TAF8	ENSG00000137413	-0.237607	4.58968	3.73277	0.0533548	0.0996041
DUSP5	ENSG00000138166	-0.371465	4.82605	1.67453	0.195654	0.291473
FGF2	ENSG00000138685	0.608685	3.8142	3.09777	0.0783996	0.137336
KIAA1109	ENSG00000138688	-0.277088	6.48671	4.13278	0.0420602	0.0813795
ZIC5	ENSG00000139800	1.74838	-1.16268	4.11784	0.0424332	0.0819915
GCNT3	ENSG00000140297	0.735746	3.70859	5.09795	0.0239542	0.0503935
GID4	ENSG00000141034	-0.308784	3.84493	3.49343	0.0616129	0.112331
TOB1	ENSG00000141232	-1.05778	5.86011	26.8865	2.16e-07	1.33e-06
GATA6	ENSG00000141448	-0.480853	2.26105	1.78078	0.182054	0.27588
PELP1	ENSG00000141456	0.0042008	5.55425	0.00139484	0.970208	0.980448
NARF	ENSG00000141562	0.706923	5.331	33.097	8.77e-09	6.79e-08
UCK2	ENSG00000143179	0.422686	4.21941	4.53857	0.0331392	0.0665196
ANP32E	ENSG00000143401	0.233059	5.76814	2.04185	0.153023	0.239651
ADAM15	ENSG00000143537	0.987715	6.40139	30.3623	3.58e-08	2.51e-07
GATAD2B	ENSG00000143614	-0.307111	4.89945	5.96231	0.0146149	0.0328306
ARF1	ENSG00000143761	0.279653	8.59871	4.52721	0.0333599	0.0669104
C1orf35	ENSG00000143793	0.143416	4.12472	0.883512	0.347242	0.459983
UBXN4	ENSG00000144224	0.222546	7.07042	2.33765	0.12628	0.204689
GULP1	ENSG00000144366	-1.16036	4.15509	12.1283	0.000496618	0.00159843
CTDSPL	ENSG00000144677	-1.22542	5.80067	44.1052	3.11e-11	3.31e-10
TMF1	ENSG00000144747	0.0465219	5.1239	0.0828572	0.773462	0.839512
TMEM44	ENSG00000145014	1.70275	4.44938	31.923	1.6e-08	1.19e-07
OSMR	ENSG00000145623	2.52205	7.20997	73.035	1.27e-17	3.03e-16
LHFPL2	ENSG00000145685	3.27598	5.85292	159.267	1.64e-36	3.41e-34
RNF44	ENSG00000146083	0.621645	6.19894	23.8525	1.04e-06	5.65e-06
ZC3HAV1L	ENSG00000146858	1.70717	2.80344	40.9264	1.58e-10	1.55e-09
NCAPG2	ENSG00000146918	1.07999	3.79295	41.8469	9.87e-11	9.91e-10
ZNF157	ENSG00000147117	-1.1831	-1.37968	3.30373	0.0691227	0.123657
PRPS1	ENSG00000147224	0.0842407	5.13169	0.435739	0.509186	0.617756
PTGES2	ENSG00000148334	-0.897829	5.38975	26.6844	2.4e-07	1.46e-06
NOTCH1	ENSG00000148400	0.417945	6.69063	4.61925	0.031615	0.0638978
EIF4EBP2	ENSG00000148730	-0.524579	7.68134	9.14512	0.00249383	0.00682407
SESN3	ENSG00000149212	-0.477178	5.50333	5.84512	0.0156203	0.0347889
INCENP	ENSG00000149503	0.629523	3.5671	17.1076	3.53e-05	0.0001457
HMGA2	ENSG00000149948	-0.0763056	0.871267	0.0284117	0.866145	0.908507
TIRAP	ENSG00000150455	0.289656	2.35035	2.59644	0.107104	0.178215
CD226	ENSG00000150637	0.443865	2.4213	2.73497	0.0981735	0.165586
ITPR1	ENSG00000150995	-0.481908	6.01393	9.05166	0.00262457	0.00714132
SLC7A11	ENSG00000151012	3.87617	2.37529	121.828	2.52e-28	2.21e-26
TWF1	ENSG00000151239	0.166701	5.68149	0.859269	0.353943	0.466911
SRFBP1	ENSG00000151304	0.0454756	3.21172	0.0799118	0.777417	0.842502
GUF1	ENSG00000151806	-0.119775	4.58622	0.569263	0.450552	0.562261
TRIM36	ENSG00000152503	1.85182	1.01752	48.46	3.37e-12	4.06e-11
BCL2L11	ENSG00000153094	0.0528165	4.73632	0.0952195	0.757644	0.827871
SMARCA5	ENSG00000153147	0.204855	6.28038	2.75167	0.097153	0.16408
GTF2E1	ENSG00000153767	0.116783	3.37339	0.504093	0.477707	0.588345
MCOLN2	ENSG00000153898	0.766123	1.69259	2.36909	0.123759	0.201321
FLCN	ENSG00000154803	0.261646	4.98806	4.43971	0.0351122	0.0698624
MED7	ENSG00000155868	-0.25794	3.59667	1.84911	0.173887	0.265905
GNAQ	ENSG00000156052	0.270841	6.38377	2.98195	0.0841979	0.14586
ZDHHC5	ENSG00000156599	0.164204	6.66131	1.2841	0.257139	0.362831
MED19	ENSG00000156603	0.165133	3.38637	0.987985	0.320235	0.431163
AP3S2	ENSG00000157823	-0.661406	4.75229	18.2556	1.93e-05	8.38e-05
CNNM4	ENSG00000158158	0.63765	4.41867	22.0332	2.68e-06	1.37e-05
ZSCAN12	ENSG00000158691	0.267953	2.69522	1.84348	0.174544	0.266666
F11R	ENSG00000158769	0.124272	6.01291	0.677154	0.410568	0.524084
UBE2Z	ENSG00000159202	0.495995	6.85878	15.5391	8.08e-05	0.000308734
ACTC1	ENSG00000159251	-0.44534	1.29995	0.390959	0.531796	0.638232
BTG2	ENSG00000159388	-0.681249	7.4728	5.41769	0.0199337	0.0429365
GPBP1L1	ENSG00000159592	-0.196542	6.48702	3.05799	0.0803412	0.140302
TNFRSF13C	ENSG00000159958	1.19383	0.582917	2.14346	0.143179	0.226997
VMA21	ENSG00000160131	0.415558	5.37805	8.51469	0.00352292	0.00931109
PKNOX1	ENSG00000160199	0.0730434	4.05919	0.211171	0.645851	0.737563
ORAI2	ENSG00000160991	0.591001	5.69689	12.7965	0.000347272	0.00115531
ASGR2	ENSG00000161944	-1.15709	1.1538	8.32265	0.00391537	0.01022
ZNF75A	ENSG00000162086	-0.149515	3.63563	1.10539	0.293087	0.402401
PDPN	ENSG00000162493	-0.456424	2.13426	1.25519	0.262563	0.36869
REL	ENSG00000162924	0.4945	2.85103	5.86914	0.0154086	0.0343669
EIF5A2	ENSG00000163577	-0.881752	2.86701	14.1506	0.000168746	0.000602129
RPL9	ENSG00000163682	0.60189	8.83885	15.417	8.62e-05	0.000327383
TMEM41A	ENSG00000163900	0.0206714	4.82037	0.0148447	0.903027	0.933932
CASP3	ENSG00000164305	0.952187	4.51615	32.0654	1.49e-08	1.11e-07
TLR3	ENSG00000164342	2.09919	5.94751	130.613	3.01e-30	3.23e-28
CCDC171	ENSG00000164989	-0.376839	1.54214	3.6547	0.0559113	0.103642
KIAA1958	ENSG00000165185	-0.725625	4.47515	9.47988	0.00207737	0.00581364
GTF2A1	ENSG00000165417	-0.0935861	5.19245	0.35144	0.553299	0.657227
PDZD8	ENSG00000165650	-0.327384	5.58401	3.83748	0.0501189	0.0944389
MOAP1	ENSG00000165943	-0.417071	5.58307	6.95628	0.00835255	0.0200693
MTMR10	ENSG00000166912	-0.903268	5.77301	32.2282	1.37e-08	1.03e-07
TEF	ENSG00000167074	-0.643132	5.71867	9.22279	0.00239021	0.00656925
SNRPD1	ENSG00000167088	0.585698	4.66514	14.2602	0.000159195	0.000571041
DUS2	ENSG00000167264	-0.120155	3.08482	0.395421	0.529464	0.636147
IRGQ	ENSG00000167378	-0.381323	4.61056	9.4869	0.00206944	0.00579494
SERTAD3	ENSG00000167565	-0.296144	4.59357	3.13937	0.0764232	0.134494
WDR81	ENSG00000167716	0.146561	6.00286	0.828912	0.362587	0.475847
ZNF598	ENSG00000167962	0.419078	4.67383	11.212	0.000812709	0.00250142
CASKIN1	ENSG00000167971	-0.466168	-0.378695	0.581558	0.445702	0.557772
KIAA1586	ENSG00000168116	0.121712	2.72324	0.624479	0.429388	0.542426
DDIT4	ENSG00000168209	2.75823	7.12517	71.9321	2.23e-17	5.12e-16
RBPJ	ENSG00000168214	0.668679	6.31161	28.2493	1.07e-07	6.9e-07
PCMTD1	ENSG00000168300	-0.390756	6.00308	8.40057	0.00375104	0.00983098
LETM1	ENSG00000168924	-1.23606	5.5064	63.3013	1.77e-15	3.22e-14
PPIC	ENSG00000168938	0.0352726	4.27724	0.0418316	0.837941	0.888062
MFF	ENSG00000168958	-0.22223	5.87493	2.43254	0.11884	0.194549
UQCRFS1	ENSG00000169021	-1.20891	6.20523	41.3029	1.3e-10	1.29e-09
SHE	ENSG00000169291	0.243101	4.41713	0.99346	0.318898	0.429623
SLC33A1	ENSG00000169359	-0.139551	4.69578	0.540247	0.46233	0.573161
STAT2	ENSG00000170581	0.871916	6.84529	28.8584	7.79e-08	5.17e-07
KIF5B	ENSG00000170759	0.173314	7.05037	1.71834	0.189906	0.284756
FOXN2	ENSG00000170802	0.44928	4.28583	6.23375	0.0125338	0.0287071
S1PR1	ENSG00000170989	1.11046	6.06606	26.106	3.23e-07	1.93e-06
C11orf24	ENSG00000171067	0.479087	4.90628	9.49122	0.00206458	0.00578272
C1GALT1C1	ENSG00000171155	0.0103197	4.45664	0.00693855	0.933615	0.955989
TPPP	ENSG00000171368	-0.273253	4.20418	0.756696	0.384364	0.498466
PIK3CD	ENSG00000171608	0.937275	5.37271	20.5413	5.84e-06	2.81e-05
BPTF	ENSG00000171634	0.215929	6.04664	3.08333	0.0790982	0.138392
ATF7IP	ENSG00000171681	0.675131	6.27892	25.7522	3.88e-07	2.28e-06
GAP43	ENSG00000172020	1.06006	-1.02313	1.91894	0.165973	0.256258
PAIP1	ENSG00000172239	-0.112805	5.68394	0.934069	0.333808	0.4455
ALG14	ENSG00000172339	-0.244808	3.45536	1.3631	0.243001	0.346833
ZNF24	ENSG00000172466	0.0425648	6.19377	0.09284	0.760597	0.830179
PURG	ENSG00000172733	-0.504332	-0.824548	0.802904	0.370226	0.484144
ZNF417	ENSG00000173480	-0.114621	2.57071	0.409998	0.52197	0.629212
EIF1	ENSG00000173812	0.359346	8.96827	5.77217	0.0162819	0.036044
KLHL15	ENSG00000174010	-0.416606	3.39455	6.8499	0.00886462	0.0211505
ZDHHC24	ENSG00000174165	-0.186741	4.79773	2.84322	0.09176	0.156611
CHST1	ENSG00000175264	1.50798	3.68773	16.3975	5.14e-05	0.000204193
GOLGA8A	ENSG00000175265	0.647477	5.63725	3.73984	0.0531296	0.0992638
LONRF3	ENSG00000175556	-0.66638	1.87278	3.9335	0.0473333	0.08987
ZDHHC21	ENSG00000175893	-0.460406	4.36154	11.0931	0.000866474	0.0026507
DENND2C	ENSG00000175984	0.516993	1.53848	2.62444	0.10523	0.175646
ENTHD1	ENSG00000176177	2.74193	-1.59047	8.11499	0.00439008	0.0112974
EID2B	ENSG00000176401	-0.0946469	1.30712	0.0971735	0.755248	0.82621
SPRYD4	ENSG00000176422	-0.987569	4.2155	44.5382	2.49e-11	2.69e-10
CDK5R1	ENSG00000176749	0.320008	2.11887	1.55844	0.211894	0.310828
SOX11	ENSG00000176887	5.56713	1.64993	60.3193	8.07e-15	1.34e-13
ZBTB34	ENSG00000177125	-0.0446251	3.87867	0.0855211	0.76995	0.836684
PAWR	ENSG00000177425	-0.588528	5.20657	8.97016	0.00274424	0.00743636
ATOX1	ENSG00000177556	-0.462694	5.67887	9.07104	0.0025969	0.00707351
ZNF354B	ENSG00000178338	0.448054	3.45612	4.64057	0.0312246	0.0632743
DAND5	ENSG00000179284	2.30607	-1.17902	8.44456	0.00366136	0.00962864
ZADH2	ENSG00000180011	-0.747298	5.15375	21.122	4.31e-06	2.12e-05
OR2A4	ENSG00000180658	5.7988	-0.296192	54.8684	1.29e-13	1.85e-12
AEN	ENSG00000181026	1.62952	4.98578	73.9446	8.03e-18	1.98e-16
C5orf24	ENSG00000181904	-0.318934	6.09275	3.61054	0.0574146	0.105996
MRPS16	ENSG00000182180	-0.229731	5.49752	3.49952	0.0613866	0.11201
CLN8	ENSG00000182372	-0.271741	4.77806	2.38637	0.122398	0.199485
ZNRF3	ENSG00000183579	-1.34868	4.95295	23.2435	1.43e-06	7.6e-06
BMP8A	ENSG00000183682	1.35035	-0.582491	9.23191	0.00237834	0.00653972
IFITM1	ENSG00000185885	0.604311	5.78707	4.80474	0.0283815	0.0582883
ZNF267	ENSG00000185947	1.02109	4.13957	32.2594	1.35e-08	1.01e-07
PIP5K1C	ENSG00000186111	0.169385	5.81393	1.44412	0.229474	0.331411
INSIG1	ENSG00000186480	0.0605135	4.90026	0.115068	0.734446	0.809842
NF2	ENSG00000186575	-0.30849	5.43504	1.76072	0.184535	0.278491
CIDEC	ENSG00000187288	0.315791	-0.292413	0.0526074	0.818587	0.873788
EIF4EBP1	ENSG00000187840	1.6619	5.44163	33.9978	5.52e-09	4.39e-08
ZNF383	ENSG00000188283	0.233293	3.37992	2.8827	0.089536	0.153568
H3F3C	ENSG00000188375	0.891162	-1.69086	1.57709	0.209181	0.307744
PTAR1	ENSG00000188647	-0.284166	5.85137	2.98914	0.0838248	0.145333
SLX4	ENSG00000188827	0.44241	3.17242	6.91833	0.00853168	0.0204446
TRMT2B	ENSG00000188917	-0.354382	4.05316	4.97626	0.0256975	0.0535695
NUGGC	ENSG00000189233	-3.51955	2.66968	43.0129	5.44e-11	5.66e-10
SPATS2L	ENSG00000196141	0.269917	7.2495	1.03013	0.310127	0.420386
LCOR	ENSG00000196233	-0.0960665	4.92556	0.573534	0.448858	0.560806
ZFP62	ENSG00000196670	0.309279	4.39071	2.92504	0.0872153	0.150301
GM2A	ENSG00000196743	1.75927	6.805	74.7178	5.43e-18	1.37e-16
FUT11	ENSG00000196968	1.9697	5.53077	78.7007	7.23e-19	2.03e-17
ZNF772	ENSG00000197128	-0.623308	2.91517	9.17288	0.00245628	0.00673166
DDI2	ENSG00000197312	-0.224519	5.3422	1.67929	0.195018	0.29077
IPP	ENSG00000197429	-0.123772	3.49037	0.496564	0.481014	0.591353
ZNF695	ENSG00000197472	0.147843	-1.68766	0.043898	0.834044	0.885228
ZNF460	ENSG00000197714	0.204967	0.605745	0.554925	0.456312	0.567615
FAM49A	ENSG00000197872	2.1963	3.94599	72.7522	1.47e-17	3.48e-16
TOR4A	ENSG00000198113	1.47775	5.25364	58.2003	2.37e-14	3.72e-13
ZNF607	ENSG00000198182	0.0985331	2.9261	0.441155	0.506565	0.615092
TMEM184B	ENSG00000198792	0.640316	6.37884	26.7022	2.37e-07	1.45e-06
PAX9	ENSG00000198807	-0.588787	-0.976586	1.68093	0.1948	0.290501
ZNF277	ENSG00000198839	0.173295	4.14829	1.2428	0.264932	0.371223
COX20	ENSG00000203667	-0.450861	1.43519	4.40057	0.035927	0.0712571
TATDN3	ENSG00000203705	-0.313121	3.85398	3.12296	0.0771966	0.13567
TBC1D8	ENSG00000204634	0.158692	4.78155	1.45638	0.227507	0.328918
CNEP1R1	ENSG00000205423	0.734567	3.7544	18.4225	1.77e-05	7.74e-05
NRAS	ENSG00000213281	0.671225	5.99281	19.007	1.3e-05	5.87e-05
ZNF134	ENSG00000213762	-0.12845	4.01113	0.713091	0.398419	0.512304
GOLGA8B	ENSG00000215252	-0.121484	5.35678	0.298799	0.584636	0.684861
DDX3X	ENSG00000215301	0.0228007	8.2315	0.0278828	0.867385	0.909321
FNIP1	ENSG00000217128	0.440518	4.90057	8.19543	0.0041996	0.0108742
LILRA2	ENSG00000239998	2.51419	2.58736	63.1464	1.92e-15	3.47e-14
AP5Z1	ENSG00000242802	0.271469	5.60203	5.88108	0.0153045	0.0341808
FMN1	ENSG00000248905	-0.14047	3.82151	0.266688	0.605562	0.702445
XKR7	ENSG00000260903	-0.165778	-1.61576	0.0373747	0.846704	0.894484
MYZAP	ENSG00000263155	-0.655812	0.430349	1.09148	0.296142	0.405659
OTUD7B	ENSG00000264522	-0.090406	4.77231	0.404821	0.52461	0.631376
MRPS21	ENSG00000266472	-0.261314	5.6645	2.5512	0.11021	0.182578
ZNF850	ENSG00000267041	0.113675	0.975069	0.107193	0.743362	0.817067
GOLGA8IP	ENSG00000277561	3.623	-0.822605	11.7903	0.000595399	0.00188932

## Sheet: miR204-5p_targets
Gene	ensembl_id	logFC	logCPM	LR	PValue	FDR
M6PR	ENSG00000003056	0.53334	6.31588	17.8239	2.42e-05	0.000103254
AK2	ENSG00000004455	-0.445954	7.20219	7.50467	0.00615393	0.0153059
JARID2	ENSG00000008083	0.407106	4.2451	8.20451	0.00417865	0.0108344
ST3GAL1	ENSG00000008513	-1.24251	6.7017	36.0472	1.93e-09	1.63e-08
CSDE1	ENSG00000009307	-0.0281807	8.72753	0.0559827	0.812962	0.869507
PLAUR	ENSG00000011422	2.5332	5.11227	59.9451	9.75e-15	1.61e-13
BID	ENSG00000015475	1.07808	4.60457	25.3008	4.91e-07	2.83e-06
SNAI2	ENSG00000019549	-0.177425	3.8387	0.360696	0.54812	0.652783
VIM	ENSG00000026025	2.759	10.2766	92.5461	6.58e-22	2.66e-20
CD44	ENSG00000026508	1.83944	7.23926	34.9344	3.41e-09	2.78e-08
POU2F2	ENSG00000028277	2.15357	3.50081	45.2988	1.69e-11	1.87e-10
ARNTL2	ENSG00000029153	2.3531	2.99142	48.8314	2.79e-12	3.41e-11
SLC39A9	ENSG00000029364	-0.414511	6.22516	8.43332	0.00368406	0.00968016
IKZF2	ENSG00000030419	0.49029	2.99059	3.95624	0.0466979	0.0888675
MYOC	ENSG00000034971	0.970807	-0.252188	2.26491	0.132333	0.212611
HOXC8	ENSG00000037965	-0.206814	1.94751	0.648667	0.42059	0.534021
CDH1	ENSG00000039068	-0.7562	6.42228	4.54109	0.0330905	0.0664449
ARAP2	ENSG00000047365	0.751861	4.44355	18.6057	1.61e-05	7.09e-05
WWC3	ENSG00000047644	1.17039	6.07519	85.3895	2.45e-20	8.24e-19
ARHGAP6	ENSG00000047648	-0.72259	4.08828	12.5405	0.000398225	0.00130903
FSTL4	ENSG00000053108	-4.34871	1.34857	76.6329	2.06e-18	5.43e-17
FOXC1	ENSG00000054598	-1.88765	4.59992	46.122	1.11e-11	1.26e-10
MTA3	ENSG00000057935	-0.0175766	4.80136	0.0143056	0.904795	0.935121
WDR3	ENSG00000065183	0.411998	4.6983	8.22615	0.0041291	0.0107211
UFD1	ENSG00000070010	0.00937913	5.03985	0.00689898	0.933804	0.956087
CDC42	ENSG00000070831	0.173181	0.374736	0.376062	0.539719	0.645433
ATP2B1	ENSG00000070961	-0.279661	5.34035	3.35644	0.0669426	0.120525
VASH1	ENSG00000071246	2.07559	5.48404	72.4024	1.75e-17	4.11e-16
ASIC4	ENSG00000072182	1.08645	-1.76595	1.8029	0.179362	0.272425
AFF4	ENSG00000072364	0.122047	6.9015	0.513865	0.47347	0.584157
PTGS2	ENSG00000073756	-0.176809	4.01852	0.240696	0.623704	0.718772
ENO1	ENSG00000074800	0.920687	10.9694	17.8006	2.45e-05	0.000104332
TTC38	ENSG00000075234	-1.78955	6.64449	55.5554	9.09e-14	1.33e-12
SEC31B	ENSG00000075826	-0.357945	3.64217	2.10087	0.147215	0.232327
ANKRD13A	ENSG00000076513	0.991922	6.38737	36.555	1.48e-09	1.26e-08
TIGAR	ENSG00000078237	0.641202	0.224881	3.76769	0.0522519	0.0978846
ADCYAP1R1	ENSG00000078549	2.46298	-0.534716	4.86682	0.0273779	0.0565481
COL5A3	ENSG00000080573	2.34399	5.31358	56.1935	6.57e-14	9.79e-13
SRCAP	ENSG00000080603	0.232794	2.34504	1.32176	0.250276	0.35538
HSP90AA1	ENSG00000080824	-0.890272	9.30584	35.23	2.93e-09	2.41e-08
BZW1	ENSG00000082153	0.0735133	6.35006	0.35826	0.549474	0.65406
CCNT2	ENSG00000082258	0.198996	5.21454	1.28433	0.257096	0.362796
TRPM3	ENSG00000083067	-3.07745	4.8752	62.1195	3.23e-15	5.68e-14
RAB10	ENSG00000084733	0.279343	7.06812	3.93662	0.0472455	0.0897253
RBM27	ENSG00000091009	0.153001	4.08073	0.948884	0.330003	0.441619
EZR	ENSG00000092820	-0.0825824	8.82653	0.181505	0.670083	0.757412
UNC13D	ENSG00000092929	1.63642	4.58753	39.5852	3.14e-10	2.95e-09
CDC23	ENSG00000094880	0.00224953	5.01919	0.000296578	0.98626	0.991245
SEMA4G	ENSG00000095539	-0.543575	4.42299	3.2008	0.0736023	0.130343
IL11	ENSG00000095752	-2.42581	0.510683	11.2141	0.000811792	0.00249927
SIRT1	ENSG00000096717	0.148282	4.65158	1.11565	0.290857	0.399814
JAK2	ENSG00000096968	0.170937	4.45576	1.0055	0.315984	0.42675
KCNK6	ENSG00000099337	0.737865	3.60118	6.90374	0.00860156	0.0205929
SEZ6L	ENSG00000100095	0.459557	-1.46426	0.371324	0.542283	0.647764
RPL3	ENSG00000100316	0.515752	10.6722	8.64487	0.00327984	0.00872839
SYNGR1	ENSG00000100321	-0.557061	4.34884	2.80071	0.0942228	0.159948
SOS2	ENSG00000100485	-0.363867	5.52972	4.67285	0.0306431	0.062243
MMP9	ENSG00000100985	4.09289	6.00646	92.1118	8.19e-22	3.27e-20
USP14	ENSG00000101557	0.212697	5.74066	2.71602	0.0993457	0.167247
CHRDL1	ENSG00000101938	-4.44446	3.82994	27.1113	1.92e-07	1.19e-06
DHODH	ENSG00000102967	-0.227824	3.94137	1.87135	0.171321	0.262762
SLC38A7	ENSG00000103042	-0.0326908	4.52494	0.0489697	0.824866	0.878645
FBXO31	ENSG00000103264	-0.228414	4.90087	3.3678	0.0664823	0.119822
CLUAP1	ENSG00000103351	-0.0706673	4.20494	0.213743	0.643849	0.735967
PLAT	ENSG00000104368	-1.88291	5.81503	52.8114	3.67e-13	5.01e-12
SH2D4A	ENSG00000104611	-0.0458078	3.836	0.0252747	0.873685	0.913692
POP4	ENSG00000105171	0.214607	4.74583	2.30236	0.129177	0.20851
IQCE	ENSG00000106012	-0.149582	5.16355	1.02939	0.310302	0.420528
SERPINE1	ENSG00000106366	3.53738	8.49601	34.6108	4.03e-09	3.25e-08
AP1S1	ENSG00000106367	-0.165938	5.59217	1.29315	0.255467	0.361003
CHCHD3	ENSG00000106554	-0.204245	5.49806	2.04337	0.152871	0.239453
SLC1A1	ENSG00000106688	-1.71025	6.18413	18.0989	2.1e-05	9.03e-05
TGFBR1	ENSG00000106799	0.641997	6.11664	26.6431	2.45e-07	1.49e-06
BMPR1A	ENSG00000107779	-0.0383136	4.66268	0.111164	0.738823	0.813274
SH3PXD2A	ENSG00000107957	0.872133	6.06849	19.4238	1.05e-05	4.81e-05
PRKAR1A	ENSG00000108946	-0.234932	7.8936	3.31924	0.0684733	0.122695
CLNK	ENSG00000109684	-3.90215	2.81629	46.7313	8.14e-12	9.44e-11
CHORDC1	ENSG00000110172	-0.219412	4.22527	2.37512	0.123282	0.200701
BIRC2	ENSG00000110330	0.29027	6.00674	3.78158	0.0518196	0.0971848
BCL7A	ENSG00000110987	-0.833147	4.83153	25.2322	5.08e-07	2.93e-06
FOXM1	ENSG00000111206	2.24292	3.11972	57.1893	3.96e-14	6.04e-13
SH2B3	ENSG00000111252	1.49892	6.42874	68.4276	1.32e-16	2.76e-15
RAB5B	ENSG00000111540	-0.213577	7.2157	3.11076	0.0777767	0.136441
HCFC2	ENSG00000111727	0.232777	4.26643	1.66841	0.196472	0.292392
SOD2	ENSG00000112096	1.5431	9.707	24.0544	9.36e-07	5.14e-06
GLP1R	ENSG00000112164	-0.0168071	-0.666177	0.00119074	0.972473	0.981956
BACH2	ENSG00000112182	-1.34789	1.10993	19.8469	8.39e-06	3.91e-05
ARFGEF3	ENSG00000112379	1.74688	4.49803	41.0103	1.51e-10	1.49e-09
MDFI	ENSG00000112559	0.700719	2.05396	2.71051	0.0996892	0.167776
MRPS27	ENSG00000113048	0.0108348	5.69706	0.00696387	0.933494	0.955908
PRLR	ENSG00000113494	-3.53659	5.00892	53.8885	2.12e-13	2.98e-12
NR3C1	ENSG00000113580	0.800836	6.79376	18.9229	1.36e-05	6.11e-05
STC2	ENSG00000113739	2.60999	6.94879	44.7326	2.26e-11	2.45e-10
AMOTL2	ENSG00000114019	-0.116768	6.91588	0.257024	0.612172	0.708338
IGFBP2	ENSG00000115457	-2.42049	5.60024	44.5045	2.54e-11	2.73e-10
IGFBP5	ENSG00000115461	-1.51462	10.145	28.023	1.2e-07	7.7e-07
EPHA4	ENSG00000116106	-0.933708	3.95718	11.9072	0.000559173	0.00178218
DNAJC16	ENSG00000116138	-1.56879	5.3531	62.3457	2.88e-15	5.09e-14
CHD5	ENSG00000116254	-3.86484	0.0519661	34.8207	3.62e-09	2.94e-08
PHF13	ENSG00000116273	0.0883682	4.23411	0.310494	0.577377	0.678692
PRDM2	ENSG00000116731	0.15134	5.10233	1.21823	0.269708	0.376827
MRPS15	ENSG00000116898	-0.577698	5.49299	17.7483	2.52e-05	0.000106899
ETV3	ENSG00000117036	0.350715	4.60868	6.71474	0.00956193	0.0226073
PADI2	ENSG00000117115	-0.580621	3.68471	2.27256	0.131682	0.211697
SERPINC1	ENSG00000117601	-4.05703	-0.0140575	42.6928	6.4e-11	6.57e-10
CREB1	ENSG00000118260	0.389983	5.26952	10.7899	0.00102056	0.00307096
GTF3C3	ENSG00000119041	0.117192	4.86892	0.708307	0.400006	0.513728
RAB14	ENSG00000119396	-0.227199	6.653	3.33838	0.0676814	0.121592
ALDH6A1	ENSG00000119711	-4.59508	7.97149	304.851	2.89e-68	8.36e-65
KANSL1	ENSG00000120071	0.145756	5.67439	1.66123	0.197437	0.293658
ETF1	ENSG00000120705	0.124224	6.44163	0.857804	0.354354	0.467319
SERP1	ENSG00000120742	0.290191	7.10763	3.56975	0.0588411	0.108198
AKAP1	ENSG00000121057	-0.58851	5.95913	10.7896	0.00102071	0.00307101
SPOP	ENSG00000121067	0.0933993	5.61375	0.763389	0.38227	0.49639
CCRL2	ENSG00000121797	1.89874	2.69172	42.6936	6.4e-11	6.57e-10
TMEM156	ENSG00000121895	1.11256	1.05468	12.2311	0.000469983	0.00152158
GTDC1	ENSG00000121964	0.0703457	4.13241	0.169947	0.680159	0.765329
CXCR4	ENSG00000121966	3.08421	7.19809	106.86	4.78e-25	2.75e-23
BBS9	ENSG00000122507	-0.0730836	3.78952	0.261132	0.609343	0.705841
HNRNPA2B1	ENSG00000122566	-0.183922	8.99994	2.27643	0.131354	0.211271
AGO2	ENSG00000123908	0.403499	5.38128	7.97028	0.00475515	0.0121505
PLCG1	ENSG00000124181	0.142961	6.38232	1.23173	0.267071	0.373684
RAB22A	ENSG00000124209	0.195526	5.53044	2.27187	0.131741	0.211776
SNAI1	ENSG00000124216	0.37856	2.82439	1.25423	0.262745	0.368888
ZNF576	ENSG00000124444	-0.145479	3.26997	0.916478	0.338401	0.450333
SPDEF	ENSG00000124664	1.00726	-1.47264	1.87067	0.171398	0.262846
SOX4	ENSG00000124766	0.664038	6.17706	7.84331	0.00510093	0.0129355
RPP40	ENSG00000124787	-0.354802	1.61608	2.16627	0.141068	0.224279
ATXN1	ENSG00000124788	0.408328	5.56905	8.80684	0.00300103	0.00805398
RUNX2	ENSG00000124813	1.75637	3.37494	36.0109	1.96e-09	1.65e-08
MYRF	ENSG00000124920	0.204719	5.57165	0.283611	0.594344	0.693252
EFNB2	ENSG00000125266	0.858921	5.75936	16.0777	6.08e-05	0.000238631
IL1B	ENSG00000125538	1.50795	3.74015	14.3893	0.000148645	0.000536355
CHCHD5	ENSG00000125611	-0.498298	3.85611	8.83865	0.00294917	0.00792582
CCDC93	ENSG00000125633	-0.160159	5.44961	1.64319	0.199888	0.296466
VASP	ENSG00000125753	1.09993	6.47731	37.4013	9.62e-10	8.43e-09
MKKS	ENSG00000125863	-0.836603	4.65985	23.2448	1.43e-06	7.6e-06
SIX1	ENSG00000126778	2.67343	0.716663	26.5742	2.54e-07	1.54e-06
STEAP4	ENSG00000127954	1.21029	4.85635	16.648	4.5e-05	0.000181357
RBM48	ENSG00000127993	0.315788	3.60561	5.22702	0.0222386	0.0472979
LRRC4	ENSG00000128594	-0.732623	2.78927	4.74906	0.0293143	0.059933
ALDH1A2	ENSG00000128918	-3.18325	4.06617	31.1849	2.35e-08	1.7e-07
NGDN	ENSG00000129460	-0.226141	4.32021	2.52058	0.112369	0.185715
BCL2L2	ENSG00000129473	-0.920293	5.69967	30.7795	2.89e-08	2.06e-07
SNX9	ENSG00000130340	-0.422405	6.2245	9.81796	0.00172816	0.00493596
NFATC1	ENSG00000131196	0.957713	4.29174	27.4156	1.64e-07	1.03e-06
RAB11FIP4	ENSG00000131242	-1.36211	4.39305	45.1081	1.86e-11	2.05e-10
HACL1	ENSG00000131373	-1.66584	3.95379	110.179	8.95e-26	5.59e-24
BCAN	ENSG00000132692	0.872816	0.547299	5.23969	0.0220773	0.0470042
SERINC3	ENSG00000132824	0.623674	7.28684	24.2702	8.37e-07	4.63e-06
PATJ	ENSG00000132849	-1.07955	6.6383	22.3234	2.3e-06	1.19e-05
BEX2	ENSG00000133134	-2.04509	3.99328	117.206	2.59e-27	1.95e-25
SLC39A11	ENSG00000133195	-0.285517	4.68071	3.97306	0.0462336	0.0881216
FAM83F	ENSG00000133477	-2.80971	3.37113	10.5297	0.00117472	0.00348845
RNF122	ENSG00000133874	0.73018	3.43462	11.3855	0.000740202	0.00230088
DPF2	ENSG00000133884	0.30328	5.29961	7.5615	0.00596283	0.0148738
EDEM1	ENSG00000134109	0.392543	5.84515	6.7233	0.00951614	0.0225194
MEIS2	ENSG00000134138	-1.00996	4.23353	10.1586	0.00143631	0.00416297
SYT6	ENSG00000134207	-2.09263	1.32809	30.0915	4.12e-08	2.86e-07
VAV3	ENSG00000134215	-1.05473	6.37509	38.4369	5.66e-10	5.14e-09
ELP2	ENSG00000134759	0.458747	6.03992	16.2884	5.44e-05	0.000215331
HRK	ENSG00000135116	-0.372557	-0.735896	0.211621	0.6455	0.73736
CAPRIN1	ENSG00000135387	0.179279	7.37508	2.11047	0.146295	0.231098
TEC	ENSG00000135605	0.45369	1.93728	6.61188	0.01013	0.023785
GPR45	ENSG00000135973	0.929368	-1.57476	1.40728	0.235509	0.338374
NUPL2	ENSG00000136243	0.0308856	3.35122	0.0436009	0.834598	0.885572
DCAF7	ENSG00000136485	-0.331817	6.72336	7.20191	0.00728259	0.0177657
ANGPTL2	ENSG00000136859	1.77648	6.23795	35.5509	2.48e-09	2.07e-08
DNAJB5	ENSG00000137094	-0.73487	3.7794	18.7565	1.49e-05	6.6e-05
RPLP1	ENSG00000137818	0.555616	9.45016	16.9353	3.87e-05	0.000158188
SMAD6	ENSG00000137834	-0.608041	4.61871	9.54847	0.00200117	0.00562347
FNBP1L	ENSG00000137942	-0.381303	6.30006	3.55264	0.0594509	0.10912
ARHGAP29	ENSG00000137962	0.245774	6.91558	1.48429	0.223105	0.323746
G3BP2	ENSG00000138757	-0.254962	6.89423	3.58528	0.0582935	0.107396
B4GALNT3	ENSG00000139044	-2.28321	3.39038	27.8711	1.3e-07	8.28e-07
DENR	ENSG00000139726	0.215023	5.63632	3.39193	0.0655161	0.118357
TCF12	ENSG00000140262	0.381364	6.10787	4.62014	0.0315986	0.0638813
SLC27A2	ENSG00000140284	-3.5353	6.25455	63.7884	1.39e-15	2.56e-14
TLNRD1	ENSG00000140406	0.108538	5.5304	0.424173	0.514862	0.62288
ZFHX3	ENSG00000140836	0.477355	5.10512	5.91694	0.014996	0.033563
NUDT7	ENSG00000140876	-0.624861	1.41124	5.76552	0.0163436	0.0361475
MAP1LC3B	ENSG00000140941	0.171273	6.46733	1.60352	0.205405	0.303121
MYOCD	ENSG00000141052	-0.666717	1.41683	2.45168	0.117399	0.192599
GALNT1	ENSG00000141429	1.0111	5.90244	48.7527	2.9e-12	3.54e-11
ASGR1	ENSG00000141505	0.674778	0.993187	3.14862	0.0759913	0.133879
RAB40B	ENSG00000141542	-1.24644	4.69423	30.1205	4.06e-08	2.82e-07
SMAD4	ENSG00000141646	0.000284822	5.88505	3.57e-06	0.998493	0.999097
SAMD1	ENSG00000141858	0.545058	4.67717	11.2749	0.00078561	0.0024264
BRD4	ENSG00000141867	-0.1679	6.27242	2.27726	0.131283	0.211202
CACNG8	ENSG00000142408	3.49308	0.233094	26.215	3.05e-07	1.83e-06
POU2F1	ENSG00000143190	0.0830596	4.53421	0.354748	0.551438	0.655891
TOR1AIP1	ENSG00000143337	0.323642	6.19392	6.26746	0.0122976	0.0282191
DUSP10	ENSG00000143507	1.54375	3.11132	29.8674	4.63e-08	3.19e-07
MEIS1	ENSG00000143995	-0.601997	3.85539	6.21468	0.0126695	0.0289607
MUC4	ENSG00000145113	-0.858169	2.2688	5.99507	0.0143459	0.0322891
MARCH1	ENSG00000145416	2.39986	4.40762	97.5441	5.27e-23	2.4e-21
MYLK4	ENSG00000145949	-2.1538	2.76485	71.4253	2.88e-17	6.51e-16
FAXC	ENSG00000146267	-3.75392	0.146737	33.1566	8.5e-09	6.6e-08
PNRC1	ENSG00000146278	0.374425	6.95022	5.05966	0.024489	0.0513554
CREB5	ENSG00000146592	0.995639	4.97389	11.14	0.00084488	0.00259046
GIGYF1	ENSG00000146830	0.0865717	6.50823	0.442441	0.505946	0.614498
TLK2	ENSG00000146872	0.19506	4.75455	3.32462	0.0682498	0.122379
NTRK2	ENSG00000148053	-1.39058	5.15731	15.4517	8.46e-05	0.000322015
NOTCH1	ENSG00000148400	0.417945	6.69063	4.61925	0.031615	0.0638978
TMEM236	ENSG00000148483	-0.543756	-0.223515	1.40883	0.23525	0.338081
A1CF	ENSG00000148584	-2.94049	4.88432	30.4389	3.45e-08	2.43e-07
CAMK2G	ENSG00000148660	-1.07863	5.23655	46.2736	1.03e-11	1.17e-10
TCF7L2	ENSG00000148737	0.101226	4.61596	0.665996	0.414451	0.527877
SLC43A1	ENSG00000149150	-0.973504	2.80306	7.46985	0.00627407	0.0155645
HMGA2	ENSG00000149948	-0.0763056	0.871267	0.0284117	0.866145	0.908507
CDH8	ENSG00000150394	3.01783	0.936457	42.0579	8.86e-11	8.95e-10
ITPR1	ENSG00000150995	-0.481908	6.01393	9.05166	0.00262457	0.00714132
CACNA1C	ENSG00000151067	0.319409	4.13068	1.32316	0.250025	0.355079
THRB	ENSG00000151090	-2.06086	3.78996	52.7162	3.85e-13	5.24e-12
WWC2	ENSG00000151718	-0.414925	5.69176	7.26193	0.00704317	0.0172271
ZNF385D	ENSG00000151789	-1.28669	2.277	6.66765	0.00981787	0.0231365
MBNL1	ENSG00000152601	0.70299	7.0945	27.6495	1.45e-07	9.2e-07
FARP1	ENSG00000152767	-0.77219	7.03538	15.699	7.43e-05	0.000285822
ENAH	ENSG00000154380	0.393851	5.49166	4.35239	0.0369571	0.0730561
TTC39B	ENSG00000155158	-1.57429	4.78066	35.2524	2.9e-09	2.39e-08
PI4K2A	ENSG00000155252	-0.470917	4.74494	10.2501	0.00136675	0.00397829
MIER3	ENSG00000155545	-0.143938	4.30057	0.769505	0.38037	0.494394
ELMSAN1	ENSG00000156030	0.427397	5.76727	7.00668	0.00812059	0.0195913
UTP14A	ENSG00000156697	0.365733	3.92371	6.10608	0.0134717	0.0305472
ZNF689	ENSG00000156853	-0.0139194	3.48378	0.00797205	0.928854	0.952758
FZD1	ENSG00000157240	0.827224	7.15155	10.442	0.00123179	0.0036371
ARSE	ENSG00000157399	-0.483683	5.8652	4.46324	0.0346317	0.0690904
MX1	ENSG00000157601	0.954386	6.10612	18.8524	1.41e-05	6.31e-05
AGAP1	ENSG00000157985	-0.321278	5.93155	3.49937	0.0613923	0.11201
CACHD1	ENSG00000158966	-1.47321	3.78003	67.7774	1.83e-16	3.77e-15
HLCS	ENSG00000159267	0.21509	4.49802	2.52046	0.112378	0.185716
MED8	ENSG00000159479	-0.00489922	4.59933	0.00101303	0.974609	0.983399
ZNF362	ENSG00000160094	-0.445981	5.24089	10.5607	0.00115515	0.00343755
TMPRSS3	ENSG00000160183	-0.56274	2.49339	0.869541	0.351082	0.464035
CCR5	ENSG00000160791	3.22516	4.35448	113.058	2.1e-26	1.41e-24
DVL3	ENSG00000161202	0.121814	6.48354	0.84755	0.357246	0.47025
RACGAP1	ENSG00000161800	1.22832	3.83665	50.7341	1.06e-12	1.36e-11
ZYG11B	ENSG00000162378	-0.459341	5.46656	10.3429	0.00129975	0.003812
ALPL	ENSG00000162551	-2.58911	6.88495	31.5028	1.99e-08	1.46e-07
TGFBR2	ENSG00000163513	-0.0968088	8.0895	0.280582	0.59632	0.694787
ATXN7	ENSG00000163635	-0.454548	-0.342702	0.778206	0.37769	0.491656
CXCL3	ENSG00000163734	0.38471	1.92565	0.57843	0.446929	0.559065
C4orf3	ENSG00000164096	0.0494973	7.36632	0.0857989	0.769588	0.836365
GALNT10	ENSG00000164574	0.221784	5.59503	1.75839	0.184825	0.278821
KIAA1324L	ENSG00000164659	-0.654075	2.90145	3.08558	0.0789892	0.138222
PHKG1	ENSG00000164776	0.19486	0.0766191	0.232576	0.629621	0.72379
CYBB	ENSG00000165168	2.50636	6.66163	122.546	1.75e-28	1.62e-26
STRBP	ENSG00000165209	-0.97945	4.03049	25.1214	5.38e-07	3.08e-06
ZCCHC24	ENSG00000165424	0.221438	4.63399	0.865535	0.352195	0.465266
ZNF22	ENSG00000165512	0.485883	4.41447	7.96192	0.00477718	0.0121987
JCAD	ENSG00000165757	0.698208	6.49888	11.9077	0.000559032	0.00178198
LIPC	ENSG00000166035	-1.63181	4.29137	14.1788	0.000166234	0.000594082
SGPL1	ENSG00000166224	0.214824	6.10025	4.08911	0.0431605	0.0831401
C11orf74	ENSG00000166352	-0.121471	2.98132	0.472311	0.491926	0.601606
XRRA1	ENSG00000166435	0.0498525	3.21504	0.0623533	0.802814	0.861878
MAPRE2	ENSG00000166974	1.09383	6.41435	28.81	7.98e-08	5.29e-07
SLC43A2	ENSG00000167703	-1.27771	6.88195	23.2282	1.44e-06	7.66e-06
SERPINF2	ENSG00000167711	-1.22612	7.65339	6.58082	0.0103083	0.0241522
SOST	ENSG00000167941	-8.73833	2.51263	183.027	1.06e-41	3.55e-39
IRF2BP2	ENSG00000168264	0.412284	7.16525	7.4954	0.00618566	0.0153666
SHOX2	ENSG00000168779	2.46982	-0.371295	12.6612	0.000373322	0.00123435
ABHD15	ENSG00000168792	-0.241879	4.55929	2.15621	0.141995	0.225474
TM4SF20	ENSG00000168955	-0.140217	-1.34101	0.0352326	0.851109	0.897622
FEM1B	ENSG00000169018	0.262585	5.85248	4.81432	0.0282241	0.0580011
MAP2K1	ENSG00000169032	0.517143	5.68998	19.5525	9.79e-06	4.53e-05
ZBTB43	ENSG00000169155	-0.243865	3.78046	1.50998	0.219142	0.319235
GP2	ENSG00000169347	-8.23815	1.58685	107.585	3.31e-25	1.94e-23
CXCL8	ENSG00000169429	1.8903	5.85353	11.5478	0.0006783	0.00212558
SPNS1	ENSG00000169682	0.308874	0.217218	0.946358	0.330648	0.442405
SYAP1	ENSG00000169895	-0.274835	5.89743	3.78677	0.0516593	0.0969313
ZNF747	ENSG00000169955	0.149553	3.54728	0.813186	0.36718	0.48092
SLC16A5	ENSG00000170190	-2.21783	3.64088	28.8722	7.73e-08	5.14e-07
USP47	ENSG00000170242	0.0314256	6.01608	0.0730833	0.786899	0.849597
HARS	ENSG00000170445	0.205769	5.72372	1.99744	0.157565	0.245568
ELOVL6	ENSG00000170522	0.25803	3.83552	0.941817	0.331811	0.443628
CDH2	ENSG00000170558	0.688249	6.18324	3.01491	0.082502	0.143426
AKAP13	ENSG00000170776	0.52144	6.84592	15.3433	8.96e-05	0.000338811
HAS2	ENSG00000170961	-0.237845	1.05306	0.212965	0.644453	0.736382
NPTX1	ENSG00000171246	-1.55963	2.64829	8.90337	0.00284645	0.00768007
LURAP1	ENSG00000171357	-1.69435	0.780729	22.9753	1.64e-06	8.65e-06
TPPP	ENSG00000171368	-0.273253	4.20418	0.756696	0.384364	0.498466
BPTF	ENSG00000171634	0.215929	6.04664	3.08333	0.0790982	0.138392
BCL2	ENSG00000171791	0.743267	6.14819	7.94267	0.00482826	0.0123101
MRM3	ENSG00000171861	-0.340741	3.3617	4.48181	0.0342574	0.0684557
ADCY5	ENSG00000173175	0.278619	5.84527	0.747059	0.387409	0.50135
ZWILCH	ENSG00000174442	0.668018	2.70443	9.34628	0.00223439	0.00620655
SH3BP5L	ENSG00000175137	0.294201	5.4897	2.95064	0.0858433	0.148256
MCTP1	ENSG00000175471	1.66467	3.553	31.618	1.88e-08	1.38e-07
EID2B	ENSG00000176401	-0.0946469	1.30712	0.0971735	0.755248	0.82621
DNAJC30	ENSG00000176410	-0.503948	3.69667	9.73229	0.00181058	0.00514094
BDNF	ENSG00000176697	0.565003	1.75539	0.971561	0.324291	0.43551
FZD8	ENSG00000177283	-0.650378	4.71517	14.8282	0.000117758	0.000434451
VN1R1	ENSG00000178201	-0.149859	-0.43225	0.145602	0.702774	0.78365
CD28	ENSG00000178562	1.63764	2.65545	18.7339	1.5e-05	6.68e-05
HTR1F	ENSG00000179097	2.04821	0.413242	16.4234	5.07e-05	0.000201872
TMTC2	ENSG00000179104	0.245591	4.71058	1.42713	0.232233	0.334607
CDH4	ENSG00000179242	2.75394	4.25483	16.0219	6.26e-05	0.000244854
CDC42EP4	ENSG00000179604	-0.0427856	5.53426	0.0956946	0.757059	0.827409
ZNF48	ENSG00000180035	-0.0908643	3.36587	0.237172	0.626256	0.720888
CCDC43	ENSG00000180329	0.202381	3.74173	1.83557	0.175471	0.267832
ZDHHC20	ENSG00000180776	0.65918	5.43691	29.9677	4.39e-08	3.04e-07
C6orf223	ENSG00000181577	3.05811	5.17993	38.4169	5.71e-10	5.19e-09
PLAG1	ENSG00000181690	-1.53463	1.31387	17.723	2.56e-05	0.000108121
ZBTB20	ENSG00000181722	-0.244149	2.87382	0.480132	0.488362	0.598323
AP1S2	ENSG00000182287	1.00024	5.0137	39.4639	3.34e-10	3.13e-09
ZSCAN22	ENSG00000182318	0.117866	2.15923	0.391282	0.531626	0.638095
CEP97	ENSG00000182504	0.0316494	3.25748	0.0353668	0.850829	0.897597
PAQR7	ENSG00000182749	-2.5577	5.12996	158.737	2.14e-36	4.38e-34
HCAR2	ENSG00000182782	0.695395	1.79282	1.00069	0.317143	0.427846
PLCXD3	ENSG00000182836	-4.81185	3.20383	119.101	9.95e-28	7.92e-26
ZNF623	ENSG00000183309	0.272445	4.57454	4.85119	0.027627	0.0569509
FAM167B	ENSG00000183615	0.355203	4.45276	1.28706	0.25659	0.362202
ANKRD45	ENSG00000183831	0.0869438	-1.34936	0.0231547	0.879055	0.917568
SRARP	ENSG00000183888	-5.89541	-0.982935	31.4679	2.03e-08	1.48e-07
LRRC55	ENSG00000183908	-1.66473	-0.0958622	19.2895	1.12e-05	5.14e-05
KNTC1	ENSG00000184445	1.48518	4.2015	48.5812	3.17e-12	3.83e-11
SORCS2	ENSG00000184985	-0.228258	3.99818	0.289943	0.590257	0.689631
LSAMP	ENSG00000185565	-5.25115	0.996869	22.8382	1.76e-06	9.25e-06
SP1	ENSG00000185591	0.386702	6.92543	9.12994	0.00251461	0.00687199
ANKFY1	ENSG00000185722	-0.0707963	5.78431	0.26945	0.603701	0.700813
BCL9L	ENSG00000186174	0.73711	5.78149	22.3729	2.25e-06	1.16e-05
PPP1CC	ENSG00000186298	0.538664	6.6907	22.4844	2.12e-06	1.1e-05
ZKSCAN4	ENSG00000187626	0.550062	2.54089	10.1647	0.00143158	0.0041508
C6orf132	ENSG00000188112	-0.17386	2.91357	0.343617	0.557749	0.66104
BLOC1S5	ENSG00000188428	0.0287116	4.57382	0.0294433	0.86376	0.906668
ADAT2	ENSG00000189007	0.283206	2.54974	2.03484	0.15373	0.240627
IL1RAP	ENSG00000196083	1.08533	3.88631	23.1575	1.49e-06	7.92e-06
PTPRT	ENSG00000196090	-2.22857	-1.07174	7.39494	0.00654075	0.0161431
HLA-DRB1	ENSG00000196126	1.70839	9.46608	100.493	1.19e-23	5.73e-22
TSC22D2	ENSG00000196428	-0.427882	5.07093	8.28597	0.00399526	0.0104086
MYO18A	ENSG00000196535	-0.0595913	5.91334	0.233873	0.628667	0.722937
TCF4	ENSG00000196628	1.48571	6.46926	44.4231	2.65e-11	2.84e-10
WNK3	ENSG00000196632	-2.36085	1.42889	24.8732	6.12e-07	3.47e-06
TECPR2	ENSG00000196663	-0.515365	4.78561	13.3478	0.00025872	0.000884736
SRGAP1	ENSG00000196935	0.203923	4.0822	1.31858	0.250846	0.356011
ZNF398	ENSG00000197024	0.0323758	3.7597	0.0586811	0.808593	0.866195
MAFG	ENSG00000197063	0.00426121	5.21117	0.00128855	0.971365	0.981066
SLC22A6	ENSG00000197901	-6.75248	7.66639	68.4944	1.27e-16	2.67e-15
SOWAHC	ENSG00000198142	-0.980351	4.88023	25.1616	5.27e-07	3.03e-06
HLA-DRB5	ENSG00000198502	1.72409	8.15482	79.2878	5.37e-19	1.52e-17
SMOC1	ENSG00000198732	-1.75275	0.841939	6.89853	0.00862664	0.0206444
UBE2J1	ENSG00000198833	0.681685	6.28306	30.3682	3.57e-08	2.51e-07
RORB	ENSG00000198963	-4.28909	0.36057	44.321	2.79e-11	2.98e-10
SAMD5	ENSG00000203727	-1.19576	4.08328	14.6073	0.000132397	0.000483376
BRD2	ENSG00000204256	0.131529	7.65378	1.3399	0.247051	0.351772
MICA	ENSG00000204520	0.350153	4.55583	6.3338	0.0118458	0.0273069
IPO7	ENSG00000205339	0.123094	7.01069	0.897313	0.343503	0.455872
ATP6AP1L	ENSG00000205464	0.373136	2.3464	1.71021	0.190958	0.285968
CPT1B	ENSG00000205560	-0.0235579	0.511717	0.00496061	0.94385	0.963104
DPF3	ENSG00000205683	-1.81152	3.24639	14.7583	0.000122211	0.00044909
C21orf62	ENSG00000205929	-3.14938	0.264602	49.018	2.54e-12	3.12e-11
XKR4	ENSG00000206579	-2.19107	-0.662221	10.9072	0.000957911	0.00289984
SFT2D2	ENSG00000213064	0.297032	6.34538	2.82293	0.0929265	0.158198
SYNJ2BP	ENSG00000213463	-0.994453	5.55175	31.4322	2.07e-08	1.51e-07
ATF6B	ENSG00000213676	0.281427	6.28041	6.68713	0.00971112	0.0229222
KCTD11	ENSG00000213859	1.11856	4.55714	37.3935	9.65e-10	8.46e-09
UCA1	ENSG00000214049	-0.45303	-1.57093	0.197711	0.656574	0.746805
AS3MT	ENSG00000214435	-0.916519	-1.23465	4.97295	0.0257467	0.0536574
LINC00598	ENSG00000215483	-1.28847	-0.671489	5.45082	0.0195591	0.042245
PPP3R1	ENSG00000221823	0.31261	4.68234	5.14265	0.023345	0.0492596
TIAF1	ENSG00000221995	-0.0253432	1.20147	0.0114975	0.914609	0.942529
ZBTB22	ENSG00000236104	-0.0981314	4.72618	0.541313	0.461889	0.572754
AKAP2	ENSG00000241978	0.147899	-0.394266	0.187509	0.664998	0.753573
MALAT1	ENSG00000251562	-0.77116	8.46871	11.555	0.000675678	0.00211852
HOXA10	ENSG00000253293	-0.536071	3.48505	2.17391	0.140369	0.223363
AP5B1	ENSG00000254470	-0.324762	4.68006	4.22921	0.0397339	0.077644
MEX3A	ENSG00000254726	0.562504	2.33455	2.75745	0.0968022	0.163614
NOX5	ENSG00000255346	-1.49614	-0.170506	7.14046	0.00753638	0.0183289
PDF	ENSG00000258429	-1.04961	2.32072	18.8116	1.44e-05	6.43e-05
ITGB3	ENSG00000259207	-0.387238	3.29625	1.56229	0.21133	0.310177
GAN	ENSG00000261609	0.361185	2.83343	3.1367	0.0765485	0.134694
TXNIP	ENSG00000265972	0.124249	9.82275	0.622761	0.430023	0.54311
SPIB	ENSG00000269404	0.375551	0.229461	0.400643	0.526757	0.633531
NUDT3	ENSG00000272325	0.276246	2.18269	1.93825	0.163859	0.253449
PRICKLE4	ENSG00000278224	-0.513907	-1.69068	0.697884	0.403496	0.517109
ADORA3	ENSG00000282608	3.76852	3.08967	194.876	2.74e-44	1.18e-41
