# Supplementary material for: Identification of RCC Subtype-Specific microRNAs–Meta-Analysis of High-Throughput RCC Tumor microRNA Expression Data
Source: Cancers (Basel). 2021 Feb 1;13(3):548. doi: 10.3390/cancers13030548 (PMC7867039; doi:10.3390/cancers13030548)
Supplement: Supplementary file 1 [file cancers-13-00548-s001.zip › Supplementary_Tables.pdf]

**Supplementary Table S1.** List of patients.

| Patient name | RCC subtype | Gender | TNM | Metastasis | Fuhrman grade | Control tissue NGS | Control tissue qPCR | Analysis in which sample were used                |
|--------------|-------------|--------|-----|------------|---------------|--------------------|---------------------|---------------------------------------------------|
| 001C         | ccRCC       | M      | 3   | N          | 3             |                    |                     | RNA-Seq                                           |
| 003S         | ccRCC       | F      | 4   | Y          | 4             |                    |                     | miRNA-Seq                                         |
| 004C         | ccRCC       | M      | 3   | N          | 3             |                    |                     | RNA-Seq, miRNA-Seq                                |
| 005C         | ccRCC       | F      | 1   | N          | 3             |                    |                     | RNA-Seq                                           |
| 006C         | ccRCC       | M      | 3   | N          | 4             |                    |                     | RNA-Seq                                           |
| 009C         | ccRCC       | M      | 3   | N          | 3             |                    |                     | RNA-Seq                                           |
| 011C         | ccRCC       | F      | 3   | N          | 2             |                    |                     | RNA-Seq                                           |
| 012C         | ccRCC       | M      | 4   | Y          | 4             |                    |                     | RNA-Seq, miRNA-Seq                                |
| 016C         | ccRCC       | F      | 1   | N          | 2             |                    |                     | RNA-Seq, miRNA-Seq                                |
| 019C         | ccRCC       | M      | 1   | N          | 2             |                    |                     | RNA-Seq, miRNA-Seq                                |
| 024C         | ccRCC       | M      | 3   | Y          | 2             |                    |                     | RNA-Seq, miRNA-Seq                                |
| 028C         | ccRCC       | M      | 1   | N          | 2             |                    |                     | RNA-Seq                                           |
| 030C         | ccRCC       | M      | 1   | N          | 2             |                    |                     | RNA-Seq                                           |
| 034C         | ccRCC       | M      | 1   | N          | 2             |                    |                     | RNA-Seq                                           |
| 035C         | ccRCC       | M      | 1   | N          | 3             |                    |                     | RNA-Seq                                           |
| 036C         | ccRCC       | F      | 3   | N          | 3             |                    |                     | miRNA-Seq                                         |
| 045C         | ccRCC       | M      | 3   | N          | 4             |                    |                     | RNA-Seq, miRNA-Seq                                |
| 047C         | ccRCC       | M      | 1   | N          | 2             |                    |                     | miRNA-Seq                                         |
| 48C          | ccRCC       | F      | 1   |            | 2             |                    |                     | miR-qPCR, mRNA-qPCR, iso-qPCR                     |
| 050C         | ccRCC       | F      | 3   | Y          | 2             |                    |                     | RNA-Seq, miRNA-Seq, miR-qPCR, mRNA-qPCR, iso-qPCR |
| 058C         | ccRCC       | F      | 3   | N          | 3             |                    |                     | miRNA-Seq, miR-qPCR, mRNA-qPCR, iso-qPCR          |
| 059C         | ccRCC       | F      | 1   | Y          | 2             |                    |                     | RNA-Seq, miRNA-Seq                                |
| 062C         | ccRCC       | F      | 1   | N          | 3             |                    |                     | RNA-Seq                                           |
| 065C         | ccRCC       | F      | 1   | N          | 1             |                    |                     | RNA-Seq, miR-qPCR, mRNA-qPCR, iso-qPCR            |
| 067C         | ccRCC       | F      | 3   | Y          | 2             |                    |                     | RNA-Seq, miRNA-Seq                                |
| 068C         | ccRCC       | F      | 3   | Y          | 2             |                    |                     | RNA-Seq, miRNA-Seq                                |
| 069C         | ccRCC       | F      | 1   | N          | 2             |                    |                     | RNA-Seq                                           |
| 72C          | ccRCC       |        | 1   |            | 4             |                    |                     | miR-qPCR, mRNA-qPCR, iso-qPCR                     |
| 073C         | ccRCC       | F      | 1   | N          | 2             |                    |                     | RNA-Seq                                           |
| 074C         | ccRCC       | M      | 1   | N          | 1             |                    |                     | RNA-Seq                                           |
| 075C         | ccRCC       | F      | 2   | N          | 2             |                    |                     | RNA-Seq                                           |
| 081C         | ccRCC       | F      | 1   | N          | 1             |                    |                     | RNA-Seq, miR-qPCR, mRNA-qPCR, iso-qPCR            |
| 082C         | ccRCC       | F      | 1   | N          | 2             |                    |                     | RNA-Seq                                           |
| 083C         | ccRCC       | M      | 3   | Y          | 3             |                    |                     | RNA-Seq, miRNA-Seq, miR-qPCR, iso-qPCR            |
| 084C         | ccRCC       | F      | 3   | N          | 4             |                    |                     | RNA-Seq, miRNA-Seq, miR-qPCR, mRNA-qPCR, iso-qPCR |
| 090C         | ccRCC       | F      | 1   | N          | 2             |                    |                     | RNA-Seq                                           |
| 091C         | ccRCC       | F      | 3   | N          | 3             | Y                  |                     | RNA-Seq                                           |
| 096C         | ccRCC       | M      | 1   | N          | 4             |                    |                     | RNA-Seq, miRNA-Seq, iso-qPCR                      |
| 101          | ccRCC       | M      | 3   |            | 2             |                    |                     | miR-qPCR                                          |
| 103          | ccRCC       | F      | 3   |            | 1             |                    |                     | miR-qPCR, mRNA-qPCR, iso-qPCR                     |
| 104C         | ccRCC       | F      | 3   | N          | 3             |                    |                     | RNA-Seq, miRNA-Seq                                |
| 106C         | ccRCC       | F      | 3   | N          | 3             | Y                  |                     | RNA-Seq                                           |
| 107C         | ccRCC       | F      | 1   | N          | 1             |                    |                     | RNA-Seq                                           |

|        |       |   |   |   |   |   |   |                                        |
|--------|-------|---|---|---|---|---|---|----------------------------------------|
| 110    | ccRCC | F | 3 |   | 4 |   |   | miR-qPCR, iso-qPCR                     |
| 115    | ccRCC | F | 1 |   | 2 |   |   | miR-qPCR                               |
| 117C   | ccRCC | M | 3 | N | 3 |   |   | RNA-Seq                                |
| 118C   | ccRCC | F | 3 | Y | 3 |   |   | RNA-Seq, miRNA-Seq                     |
| 119C   | ccRCC | M | 3 | N | 4 | Y |   | RNA-Seq, miR-qPCR, mRNA-qPCR           |
| 120C   | ccRCC | M |   | N | 2 |   |   | miRNA-Seq                              |
| 123C   | ccRCC | F | 1 | N | 3 | Y |   | RNA-Seq, miRNA-Seq                     |
| 124C   | ccRCC | F | 1 | N | 2 |   |   | RNA-Seq                                |
| 125C   | ccRCC | F | 3 | N | 3 |   |   | RNA-Seq                                |
| 126C   | ccRCC | M | 1 | N | 2 | Y |   | RNA-Seq                                |
| 131C   | ccRCC | M | 3 |   | 2 |   |   | miR-qPCR, mRNA-qPCR, iso-qPCR          |
| 132C   | ccRCC | M | 1 | N | 3 | Y | Y | RNA-Seq, miR-qPCR, mRNA-qPCR, iso-qPCR |
| 134    | ccRCC | M |   | N | 3 |   |   | miRNA-Seq                              |
| 143C   | ccRCC | M | 3 | Y | 2 | Y | Y | RNA-Seq, miR-qPCR                      |
| 147C   | ccRCC | M | 3 | N | 2 | Y |   | RNA-Seq                                |
| 149C   | ccRCC | M | 1 | Y | 3 | Y |   | RNA-Seq, miRNA-Seq                     |
| 153C   | ccRCC | M | 3 | Y | 3 | Y |   | RNA-Seq, miRNA-Seq                     |
| 156    | ccRCC |   |   |   | 3 | Y |   | RNA-Seq                                |
| 158C   | ccRCC | F | 3 | N | 3 | Y |   | RNA-Seq                                |
| 162C   | ccRCC | M | 1 | N | 3 |   |   | RNA-Seq                                |
| 164C   | ccRCC | F | 2 | Y | 4 |   |   | RNA-Seq                                |
| 169C   | ccRCC | M | 3 | N | 4 |   |   | RNA-Seq                                |
| 171B   | ccRCC | F | 1 | N | 2 | Y |   | RNA-Seq                                |
| 172B   | ccRCC | F | 3 | N | 2 |   |   | RNA-Seq, miRNA-Seq                     |
| 175C   | ccRCC | F | 1 | N | 3 |   |   | RNA-Seq                                |
| 178C   | ccRCC | M | 3 | N | 3 |   |   | RNA-Seq, miRNA-Seq                     |
| 179C   | ccRCC | M | 3 | N | 2 | Y |   | RNA-Seq, miRNA-Seq                     |
| 180C   | ccRCC | M | 1 | N | 2 | Y |   | RNA-Seq, miRNA-Seq                     |
| 182C   | ccRCC | M | 3 | N | 3 | Y |   | RNA-Seq                                |
| 183C   | ccRCC | M | 3 | Y | 4 | Y |   | RNA-Seq                                |
| 185C   | ccRCC | F | 3 | Y | 3 |   |   | RNA-Seq, miR-qPCR, mRNA-qPCR, iso-qPCR |
| 217    | ccRCC | M | 3 |   | 3 |   |   | miR-qPCR                               |
| 220c   | ccRCC | M | 3 |   | 4 |   | Y | miR-qPCR, mRNA-qPCR, iso-qPCR          |
| 221c   | ccRCC | M | 1 |   | 1 |   |   | miR-qPCR                               |
| 222C   | ccRCC | F | 1 |   | 1 |   |   | miR-qPCR                               |
| 225c   | ccRCC | M | 3 |   | 3 |   | Y | miR-qPCR                               |
| 227c   | ccRCC | F | 2 |   | 4 |   | Y | miR-qPCR                               |
| 229c   | ccRCC | M | 1 |   | 1 |   |   | miR-qPCR                               |
| 241c   | ccRCC | F | 2 |   | 2 |   |   | miR-qPCR                               |
| 271C   | ccRCC | M | 1 |   | 2 |   |   | miR-qPCR                               |
| 291c   | ccRCC |   | 3 |   | 2 |   | Y | miR-qPCR                               |
| 293C-1 | ccRCC | M | 1 |   | 1 |   | Y | miR-qPCR, mRNA-qPCR, iso-qPCR          |
| 294    | ccRCC | F | 1 |   | 1 |   | Y | miR-qPCR, mRNA-qPCR                    |
| 299c   | ccRCC | M | 1 |   | 1 |   | Y | miR-qPCR                               |
| 302c   | ccRCC | M | 1 |   | 3 |   | Y | miR-qPCR, mRNA-qPCR, iso-qPCR          |
| 303c   | ccRCC | M | 3 |   | 3 |   |   | miR-qPCR                               |
| 306c   | ccRCC | F | 2 |   | 1 |   |   | miR-qPCR                               |
| 308    | ccRCC | M | 1 |   | 4 |   |   | miR-qPCR                               |

|      |              |   |   |  |   |   |   |          |
|------|--------------|---|---|--|---|---|---|----------|
| 316c | ccRCC        | M | 2 |  | 4 |   | Y | miR-qPCR |
| 318C | ccRCC        |   | 3 |  | 3 |   | Y | miR-qPCR |
| 319c | ccRCC        | M | 1 |  | 4 |   | Y | miR-qPCR |
| S10c | ccRCC        | M | 3 |  | 2 |   |   | miR-qPCR |
| s19c | ccRCC        | M | 1 |  | 3 |   | Y | miR-qPCR |
| s8C  | ccRCC        | M | 3 |  | 2 |   | Y | miR-qPCR |
| 77C  | onco.        |   |   |  |   |   |   | miR-qPCR |
| 78C  | onco.        |   |   |  |   |   |   | miR-qPCR |
| 210  | onco.        | M |   |  |   |   |   | miR-qPCR |
| s18c | onco.        | F |   |  |   |   |   | miR-qPCR |
| s26c | onco.        | M |   |  |   |   |   | miR-qPCR |
| 236  | onco.        | M |   |  |   |   |   | miR-qPCR |
| 208  | onco.        | M |   |  |   |   |   | miR-qPCR |
| 228  | onco.        | M |   |  |   |   |   | miR-qPCR |
| 010C | pRCC         |   |   |  |   |   |   | miR-qPCR |
| 013C | pRCC         |   |   |  |   |   |   | miR-qPCR |
| 029C | pRCC         |   |   |  |   |   |   | miR-qPCR |
| 33C  | pRCC         |   |   |  |   |   |   | miR-qPCR |
| 39C  | pRCC         |   |   |  |   |   |   | miR-qPCR |
| 51C  | pRCC         |   |   |  |   |   |   | miR-qPCR |
| 272c | pRCC         | M |   |  |   |   | Y | miR-qPCR |
| 288c | pRCC         | M |   |  |   |   | Y | miR-qPCR |
| 311c | pRCC         |   |   |  |   |   | Y | miR-qPCR |
| 322c | pRCC         | F |   |  |   |   | Y | miR-qPCR |
| 120  | only control | M | 3 |  |   | Y | Y | miR-qPCR |
| 135  | only control |   |   |  |   |   | Y | miR-qPCR |

ccRCC, clear cell renal cell carcinoma; pRCC, papillary renal cell carcinoma; onco., oncocytoma; F, female; M, male; TNM, TNM Classification of Malignant Tumors; samples usage: miR-qPCR, qPCR for miRNA; iso-qPCR, qPCR for isoforms of miRNA; mRNA-qPCR, qPCR for mRNA

**Supplementary Table S2.** Identified iso-miRNAs in healthy and ccRCC kidney tissues in Exp1 and Exp4 data sets. The average percentage of miRNA isoforms.

|                                                 |                                    | Exp1                          |                                |                      |               | Exp4                          |                                 |                      |               |
|-------------------------------------------------|------------------------------------|-------------------------------|--------------------------------|----------------------|---------------|-------------------------------|---------------------------------|----------------------|---------------|
|                                                 |                                    | AVG<br>ccRCC<br>[%]<br>n = 26 | AVG<br>healthy<br>[%]<br>n = 6 | Ratio<br>in<br>ccRCC | P-value       | AVG<br>ccRCC<br>[%]<br>n = 18 | AVG<br>healthy<br>[%]<br>n = 18 | Ratio<br>in<br>ccRCC | P-value       |
| <b>hsa-miR-200c-3p</b>                          |                                    |                               |                                |                      |               |                               |                                 |                      |               |
| 5' -CGGUUGGGAGUCUCUAAUACUGCCGGGUAAGAUGGAGG-3'   |                                    |                               |                                |                      |               |                               |                                 |                      |               |
| reference                                       | UAAUACUGCCGGGUAAGAUGGA             | 65.066<br>7                   | 63.231<br>6                    | 1.0290               | 0.8926        | 50.048<br>2                   | 60.790<br>6                     | 0.8233               | <b>0.0029</b> |
|                                                 | UAAUACUGCCGGGUAAGAUGG              | 21.263<br>3                   | 26.660<br>6                    | 0.7976               | 0.6307        | 21.531<br>3                   | 17.848<br>0                     | 1.2064               | 0.2040        |
|                                                 | UAAUACUGCCGGGUAAGAUGGAU            | 1.7062                        | 2.3420                         | 0.7285               | 0.7871        | 2.9506                        | 2.9663                          | 0.9947               | 0.9911        |
|                                                 | UAAUACUGCCGGGUAAGAUGGU             | 11.963<br>8                   | 7.7658                         | 1.5406               | 0.6636        | 8.7295                        | 9.8789                          | 0.8837               | 0.5968        |
|                                                 | UAAUACUGCCGGGUAAGAUG               | NA                            | NA                             | NA                   | NA            | 0.5779                        | 1.2904                          | 0.4478               | 0.1505        |
|                                                 | UAAUACUGCCGGGUAAGAU                | NA                            | NA                             | NA                   | NA            | 5.5160                        | 1.1923                          | 4.6266               | 0.0581        |
|                                                 | UAAUACUGCCGGGUAAGAUGGA             | NA                            | NA                             | NA                   | NA            | 7.5810                        | 4.3595                          | 1.7389               | 0.1721        |
|                                                 | UAAUACUGCCGGGUAAGAUGA              | NA                            | NA                             | NA                   | NA            | 1.0053                        | 0.4701                          | 2.1383               | 0.3915        |
|                                                 | UAAUACUGCCGGGUAAGAUGAA             | NA                            | NA                             | NA                   | NA            | 0.1852                        | 0.2383                          | 0.7771               | 0.7859        |
|                                                 | UAAUACUGCCGGGUAAGAUGGUA            | NA                            | NA                             | NA                   | NA            | 0.4657                        | 0.3657                          | 1.2734               | 0.8179        |
|                                                 | UAAUACUGCCGGGUAAGAUGGUU            | NA                            | NA                             | NA                   | NA            | 1.4095                        | 0.5999                          | 2.3496               | 0.3544        |
| <b>has-miRNA-362-5p</b>                         |                                    |                               |                                |                      |               |                               |                                 |                      |               |
| 5' -UGAAUCCUUGGAACCUAGGUGUGAGUGCUAUUUCAGUGCA-3' |                                    |                               |                                |                      |               |                               |                                 |                      |               |
|                                                 | AAUCCUUGGAACCUAGGUGUGAGU reference | 63.364<br>3                   | 64.119<br>6                    | 0.9882               | 0.9167        | 34.480<br>9                   | 47.451<br>2                     | 0.7267               | <b>0.0001</b> |
|                                                 | AAUCCUUGGAACCUAGGUGUGAGUGC         | 5.5141                        | 5.8861                         | 0.9368               | 0.8880        | 5.1825                        | 17.556<br>8                     | 0.2952               | <b>0.0000</b> |
|                                                 | AAUCCUUGGAACCUAGGUGUGA             | 3.7886                        | 3.3526                         | 1.1300               | 0.8680        | 7.6758                        | 4.1270                          | 1.8599               | <b>0.0316</b> |
|                                                 | AAUCCUUGGAACCUAGGUGUGAG            | 22.754<br>1                   | 24.466<br>7                    | 0.9300               | 0.7620        | 42.957<br>5                   | 21.447<br>0                     | 2.0030               | <b>0.0000</b> |
|                                                 | AAUCCUUGGAACCUAGGUGUGAGA           | 4.5789                        | 2.1749                         | 2.1054               | 0.4572        | 4.3160                        | 2.9306                          | 1.4727               | 0.2297        |
|                                                 | AAUCCUUGGAACCUAGGUGUGAGUG          | NA                            | NA                             | NA                   | NA            | 2.0240                        | 1.9266                          | 1.0506               | 0.8990        |
|                                                 | AAUCCUUGGAACCUAGGUGUGAGUU          | NA                            | NA                             | NA                   | NA            | 3.3632                        | 4.5607                          | 0.7374               | 0.5139        |
| <b>has-miRNA-363-3p</b>                         |                                    |                               |                                |                      |               |                               |                                 |                      |               |
| 5' -UCAUAGGAGAAAAUUUGCACGGUAUCCAUCUGUAAACC-3'   |                                    |                               |                                |                      |               |                               |                                 |                      |               |
| reference                                       | AAUUGCACGGUAUCCAUCUGUA             | 6.8393                        | 8.7565                         | 0.7810               | 0.1467        | 9.3545                        | 9.0175                          | 1.0374               | 0.5859        |
|                                                 | AAUUGCACGGUAUCCAUCUGU              | 40.060<br>7                   | 41.624<br>4                    | 0.9624               | 0.6445        | 43.780<br>2                   | 38.688<br>8                     | 1.1316               | <b>0.0206</b> |
|                                                 | AAUUGCACGGUAUCCAUCUGUAA            | 13.876<br>2                   | 20.127<br>2                    | 0.6894               | <b>0.0467</b> | 13.625<br>2                   | 22.755<br>9                     | 0.5988               | <b>0.0000</b> |
|                                                 | AAUUGCACGGUAUCCAUCUG               | 26.632<br>4                   | 9.9151                         | 2.6860               | <b>0.0057</b> | 18.740<br>4                   | 5.7392                          | 3.2653               | <b>0.0000</b> |
|                                                 | AUUGCACGGUAUCCAUCUGU               | 3.2057                        | 2.1532                         | 1.4888               | 0.2307        | 2.4178                        | 1.5468                          | 1.5631               | <b>0.0006</b> |
|                                                 | AUUGCACGGUAUCCAUCUGUAA             | 2.0746                        | 2.7705                         | 0.7488               | 0.3825        | 2.5013                        | 3.6281                          | 0.6894               | <b>0.0006</b> |
|                                                 | AAUUGCACGGUAUCCAUCUGUAU            | 6.0911                        | 12.041<br>1                    | 0.5059               | <b>0.0018</b> | 7.8480                        | 15.687<br>4                     | 0.5003               | <b>0.0000</b> |
|                                                 | AUUGCACGGUAUCCAUCUGUAU             | 1.2200                        | 2.6119                         | 0.4671               | <b>0.0256</b> | 1.7326                        | 2.9362                          | 0.5901               | <b>0.0001</b> |
| <b>hsa-miR-204-5p</b>                           |                                    |                               |                                |                      |               |                               |                                 |                      |               |
| 5' -GACUUCUUUGUCAUCCUAUGCCUGAGAAUAUGAAGG-3'     |                                    |                               |                                |                      |               |                               |                                 |                      |               |
|                                                 | UUCCUUUGUCAUCCUAUGCCU reference    | 56.305<br>1                   | 41.951<br>4                    | 1.3422               | 0.0704        | 14,692<br>6                   | 21,219<br>2                     | 0,6924               | <b>0,0023</b> |
|                                                 | UUCCUUUGUCAUCCUAUG                 | 3.6779                        | 1.5841                         | 2.3218               | 0.2224        | 2,4267                        | 0,2528                          | 9,5981               | <b>0,0001</b> |
|                                                 | UUCCUUUGUCAUCCUAUGCCUG             | 27.979<br>1                   | 48.510<br>8                    | 0.5768               | <b>0.0007</b> | 73,100<br>6                   | 68,989<br>1                     | 1,0596               | 0,0877        |
|                                                 | UUCCUUUGUCAUCCUAUGCCUGA            | 0.5211                        | 0.5341                         | 0.9757               | 0.9748        | 0,8670                        | 0,8514                          | 1,0183               | 0,8263        |
|                                                 | UUCCUUUGUCAUCCUAUGCC               | 4.7758                        | 2.1122                         | 2.2611               | <b>0.0112</b> | 1,8751                        | 0,8914                          | 2,1036               | <b>0,0020</b> |
|                                                 | UUCCUUUGUCAUCCUAUGCCUA             | 0.3268                        | 0.4086                         | 0.7998               | 0.4680        | 0,2492                        | 0,3119                          | 0,7989               | 0,0829        |
|                                                 | UUCCUUUGUCAUCCUAUGCCA              | 1.2556                        | 0.8033                         | 1.5631               | 0.2513        | 0,5209                        | 0,4065                          | 1,2815               | 0,1685        |
|                                                 | UUCCUUUGUCAUCCUAUGCCUU             | 0.6676                        | 0.7279                         | 0.9171               | 0.8198        | 0,5806                        | 0,7603                          | 0,7637               | <b>0,0065</b> |
|                                                 | UUCCUUUGUCAUCCUAUGCCUUG            | 4.4911                        | 3.3676                         | 1.3336               | 0.7768        | 5,0199                        | 5,6498                          | 0,8885               | 0,1422        |

|                                                  |             |             |        |               |             |             |             |               |
|--------------------------------------------------|-------------|-------------|--------|---------------|-------------|-------------|-------------|---------------|
| UUCCCUUUUGUCAUCCUAUGC                            | NA          | NA          | NA     | NA            | 0,2766      | 0,0912      | 3,0337      | <b>0,0000</b> |
| UUCCCUUUUGUCAUCCUAUGCAU                          | NA          | NA          | NA     | NA            | 0,1301      | 0,2283      | 0,5699      | <b>0,0091</b> |
| UUCCCUUUUGUCAUCCUAUGCCUGUA                       | NA          | NA          | NA     | NA            | 0,1511      | 0,1583      | 0,9546      | 0,7671        |
| UUCCCUUUUGUCAUCCUAUGCCUUU                        | NA          | NA          | NA     | NA            | 0,0415      | 0,0869      | 0,4770      | <b>0,0001</b> |
| UUCCCUUUUGUCAUCCUAUGCCUGUU                       | NA          | NA          | NA     | NA            | 0,0681      | 0,1028      | 0,6622      | 0,0254        |
| <b>hsa-miRNA-21-5p</b>                           |             |             |        |               |             |             |             |               |
| 5' -GGUAGCUUAUCAGACUGAUGUUGACUGUUGAAUCUCAUGG-3'  |             |             |        |               |             |             |             |               |
| UAGCUUAUCAGACUGAUGUUGA reference                 | 53.14       | 51.95       | 1.023  | 0.578         | 53.976<br>3 | 50.685<br>9 | 1.0649      | 0.0807        |
| UAGCUUAUCAGACUGAUGUUG                            | 12.01       | 12.18       | 0.985  | 0.8889        | 10.874<br>8 | 8.8147      | 1.2337      | <b>0.0065</b> |
| UAGCUUAUCAGACUGAUGUUGAC                          | 16.74       | 14.94       | 1.12   | 0.2806        | 14.379<br>6 | 15.386<br>6 | 0.9346      | 0.3699        |
| UAGCUUAUCAGACUGAUGUUGACU                         | 12.37       | 14.29       | 0.866  | 0.2381        | 14.620<br>0 | 18.297<br>9 | 0.7990      | <b>0.0082</b> |
| UAGCUUAUCAGACUGAUGUU                             | 1.964       | 1.854       | 1.059  | 0.7446        | 1.4899      | 0.9701      | 1.5357      | <b>0.0000</b> |
| UAGCUUAUCAGACUGAUGU                              | 0.643       | 0.654       | 0.984  | 0.9327        | 0.2533      | 0.2239      | 1.1317      | 0.1539        |
| UAGCUUAUCAGACUGAUGUUGAA                          | 1.016       | 1.236       | 0.822  | <b>0.0257</b> | 1.1578      | 1.3301      | 0.8704      | 0.0833        |
| UAGCUUAUCAGACUGAUGUUGACA                         | 1.654       | 2.227       | 0.743  | <b>0.0005</b> | 1.6658      | 2.4824      | 0.6710      | <b>0.0002</b> |
| UAGCUUAUCAGACUGAUGUUA                            | 0.103       | 0.118       | 0.871  | 0.5089        | 0.1212      | 0.0875      | 1.3857      | <b>0.0337</b> |
| UAGCUUAUCAGACUGAUGUUGAAA                         | 0.171       | 0.278       | 0.617  | <b>0.0036</b> | 0.3742      | 0.4875      | 0.7674      | <b>0.0420</b> |
| UAGCUUAUCAGACUGAUGUUGAU                          | 0.109       | 0.143       | 0.764  | 0.0856        | 0.2693      | 0.3542      | 0.7603      | <b>0.0316</b> |
| UAGCUUAUCAGACUGAUGUUGU                           | 0.085       | 0.13        | 0.652  | <b>0.0063</b> | 0.2195      | 0.2406      | 0.9120      | 0.3706        |
| GUAGCUUAUCAGACUGAUGUUGA                          | NA          | NA          | NA     | NA            | 0.0620      | 0.0729      | 0.8506      | 0.1755        |
| GUAGCUUAUCAGACUGAUGUUG                           | NA          | NA          | NA     | NA            | 0.0251      | 0.0291      | 0.8609      | 0.2792        |
| GUAGCUUAUCAGACUGAUGUUGAC                         | NA          | NA          | NA     | NA            | 0.0158      | 0.0194      | 0.8170      | 0.4576        |
| AGCUUAUCAGACUGAUGUUGA                            | NA          | NA          | NA     | NA            | 0.0333      | 0.0361      | 0.9226      | 0.4627        |
| AGCUUAUCAGACUGAUGUUGACU                          | NA          | NA          | NA     | NA            | 0.0512      | 0.0766      | 0.6687      | <b>0.0001</b> |
| UAGCUUAUCAGACUGAUGUA                             | NA          | NA          | NA     | NA            | 0.0553      | 0.0372      | 1.4872      | <b>0.0186</b> |
| UAGCUUAUCAGACUGAUGUUA                            | NA          | NA          | NA     | NA            | 0.0430      | 0.0407      | 1.0552      | 0.7380        |
| UAGCUUAUCAGACUGAUGUAA                            | NA          | NA          | NA     | NA            | 0.0133      | 0.0080      | 1.6526      | <b>0.0134</b> |
| UAGCUUAUCAGACUGAUGUUGAAU                         | NA          | NA          | NA     | NA            | 0.2693      | 0.3542      | 0.7603      | <b>0.0316</b> |
| UAGCUUAUCAGACUGAUGUUU                            | NA          | NA          | NA     | NA            | 0.0269      | 0.0288      | 0.9321      | 0.7274        |
| UAGCUUAUCAGACUGAUGUUGAU                          | NA          | NA          | NA     | NA            | 0.0332      | 0.0518      | 0.6413      | 0.0777        |
| UAGCUUAUCAGACUGAUGUUUA                           | NA          | NA          | NA     | NA            | 0.1404      | 0.1497      | 0.9377      | 0.7545        |
| <b>hsa-miR-224-5p</b>                            |             |             |        |               |             |             |             |               |
| 5' -CUUUCAAGUCACUAGUGGUUCCGUUUAGUAGAUGAUUGUG-3'  |             |             |        |               |             |             |             |               |
| UCAAGUCACUAGUGGUUCCGUUUAG reference              | NA          | NA          | NA     | NA            | NA          | NA          | NA          | NA            |
| CAAGUCACUAGUGGUUCCGUUUAG                         | 43.022<br>8 | 55.449<br>7 | 0.7759 | 0.1068        | 51.479<br>3 | 62.615<br>4 | 0.8222      | <b>0.0013</b> |
| CAAGUCACUAGUGGUUCCGUUUU                          | 39.425<br>5 | 16.203<br>7 | 2.4331 | <b>0.0022</b> | 28.696<br>6 | 17.044<br>8 | 1.6836      | <b>0.0001</b> |
| CAAGUCACUAGUGGUUCCGUUUA                          | 7.9281      | 13.002<br>6 | 0.6097 | 0.1417        | 5.7794      | 5.1270      | 1.1272      | 0.4465        |
| CAAGUCACUAGUGGUUCCGUUUAGU                        | 7.3273      | 14.232<br>8 | 0.5148 | 0.1171        | 6.1545      | 8.1010      | 0.7597      | 0.1152        |
| CAAGUCACUAGUGGUUCCGUU                            | 2.2963      | 1.1111      | 2.0666 | 0.4019        | 1.0007      | 0.7514      | 1.3317      | 0.5151        |
| UCAAGUCACUAGUGGUUCCGUUU                          | NA          | NA          | NA     | NA            | 0.2779      | 0.4370      | 0.6358      | 0.4525        |
| CAAGUCACUAGUGGUUCCGUUUAGA                        | NA          | NA          | NA     | NA            | 1.5150      | 1.8239      | 0.8306      | 0.4761        |
| CAAGUCACUAGUGGUUCCGUUUAA                         | NA          | NA          | NA     | NA            | 1.8503      | 1.6890      | 1.0955      | 0.6789        |
| CAAGUCACUAGUGGUUCCGUUA                           | NA          | NA          | NA     | NA            | 0.9659      | 0.7651      | 1.2624      | 0.4632        |
| CAAGUCACUAGUGGUUCCGUUAA                          | NA          | NA          | NA     | NA            | 0.3588      | 0.0265      | 13.561<br>6 | <b>0.0147</b> |
| CAAGUCACUAGUGGUUCCGUUUU                          | NA          | NA          | NA     | NA            | 1.0787      | 0.2562      | 4.2108      | <b>0.0000</b> |
| CAAGUCACUAGUGGUUCCGUUUAU                         | NA          | NA          | NA     | NA            | 0.6436      | 1.2121      | 0.5310      | 0.3882        |
| CAAGUCACUAGUGGUUCCGUUUAGUU                       | NA          | NA          | NA     | NA            | 0.1994      | 0.1507      | 1.3229      | 0.6331        |
| <b>hsa-miR-155-5p</b>                            |             |             |        |               |             |             |             |               |
| 5' -CUGUUA AUGCUAAUCGUGAUAGGGGUUUUUGCCUCCAACU-3' |             |             |        |               |             |             |             |               |

|                                                 |                           |             |             |             |               |             |             |        |               |
|-------------------------------------------------|---------------------------|-------------|-------------|-------------|---------------|-------------|-------------|--------|---------------|
| UUA AUGCUAAUCGUGAUAGGGGUU                       | reference                 | 23.823<br>4 | 21.301<br>7 | 1.1184      | 0.3897        | 30.964<br>4 | 29.618<br>1 | 1.0455 | 0.4852        |
| UUA AUGCUAAUCGUGAUAGGG                          |                           | 3.9100      | 7.6225      | 0.5130      | <b>0.0003</b> | 0.8104      | 1.0658      | 0.7603 | 0.1102        |
| UUA AUGCUAAUCGUGAUAGGGGU                        |                           | 35.869<br>3 | 34.321<br>6 | 1.0451      | 0.5640        | 30.060<br>7 | 32.144<br>2 | 0.9352 | 0.1589        |
| UUA AUGCUAAUCGUGAUAGGGGUUU                      |                           | 3.9968      | 4.1326      | 0.9672      | 0.8837        | 2.6426      | 3.8704      | 0.6828 | <b>0.0035</b> |
| UUA AUGCUAAUCGUGAUAGGGG                         |                           | 6.4934      | 6.6740      | 0.9729      | 0.8112        | 2.0383      | 3.2344      | 0.6302 | <b>0.0005</b> |
| UUA AUGCUAAUCGUGAUAGGGGA                        |                           | 11.749<br>5 | 11.097<br>7 | 1.0587      | 0.7505        | 5.4075      | 5.5154      | 0.9804 | 0.8871        |
| UUA AUGCUAAUCGUGAUAGGGGA                        |                           | 7.2448      | 7.0167      | 1.0325      | 0.8258        | 3.9582      | 5.4923      | 0.7207 | <b>0.0134</b> |
| UUA AUGCUAAUCGUGAUAGGGGAU                       |                           | 3.3309      | 5.0086      | 0.6650      | 0.0778        | 5.7477      | 4.1797      | 1.3751 | <b>0.0364</b> |
| UUA AUGCUAAUCGUGAUAGGGGU                        |                           | 3.5819      | 2.8248      | 1.2680      | 0.3280        | 4.5672      | 2.6639      | 1.7145 | <b>0.0007</b> |
| UUA AUGCUAAUCGUGAUAGGGGUUUU                     |                           | NA          | NA          | NA          | NA            | 0.8925      | 1.1141      | 0.8010 | 0.2757        |
| UUA AUGCUAAUCGUGAUAGGGGUUA                      |                           | NA          | NA          | NA          | NA            | 2.8899      | 2.6070      | 1.1085 | 0.5183        |
| UUA AUGCUAAUCGUGAUAGGGGUA                       |                           | NA          | NA          | NA          | NA            | 2.6533      | 2.6253      | 1.0106 | 0.9256        |
| UUA AUGCUAAUCGUGAUAGGGGAA                       |                           | NA          | NA          | NA          | NA            | 1.1022      | 0.7556      | 1.4588 | <b>0.0479</b> |
| UUA AUGCUAAUCGUGAUAGGGGUAAU                     |                           | NA          | NA          | NA          | NA            | 0.8701      | 0.6706      | 1.2974 | 0.3805        |
| UUA AUGCUAAUCGUGAUAGGGGUAU                      |                           | NA          | NA          | NA          | NA            | 0.5801      | 0.6879      | 0.8433 | 0.5183        |
| UUA AUGCUAAUCGUGAUAGGGGAU                       |                           | NA          | NA          | NA          | NA            | 4.0374      | 3.3516      | 1.2046 | 0.0807        |
| UUA AUGCUAAUCGUGAUAGGGGUU                       |                           | NA          | NA          | NA          | NA            | 0.7777      | 0.4036      | 1.9268 | <b>0.0025</b> |
| <b>hsa-miRNA-210-3p</b>                         |                           |             |             |             |               |             |             |        |               |
| 5' -UGCCCCAGACCCACUGUGCGUGUGACAGCGGCUGAUCUG- 3' |                           |             |             |             |               |             |             |        |               |
| reference                                       | CUGUGCGUGUGACAGCGGCUGA    | 42.891<br>0 | 49.527<br>6 | 0.8660      | <b>0.0149</b> | 34.409<br>4 | 42.174<br>5 | 0.8159 | <b>0.0000</b> |
|                                                 | CUGUGCGUGUGACAGCGGCUG     | 2.5423      | 1.9755      | 1.2869      | 0.3093        | 1.7822      | 2.0970      | 0.8499 | 0.5244        |
|                                                 | CUGUGCGUGUGACAGCGGCU      | 10.025<br>6 | 6.8729      | 1.4587      | 0.1162        | 8.4869      | 7.2670      | 1.1679 | 0.4344        |
|                                                 | CUGUGCGUGUGACAGCGGCUGAU   | 7.3747      | 7.0044      | 1.0529      | 0.7069        | 8.2708      | 8.4087      | 0.9836 | 0.8424        |
|                                                 | CUGUGCGUGUGACAGCGGC       | 1.6688      | 1.2961      | 1.2875      | 0.3378        | 1.1267      | 0.7187      | 1.5678 | <b>0.0487</b> |
|                                                 | ACUGUGCGUGUGACAGCGGCUGA   | 1.8607      | 2.9434      | 0.6322      | 0.0560        | 1.1489      | 1.6681      | 0.6887 | 0.0707        |
|                                                 | ACUGUGCGUGUGACAGCGGCUG    | 0.3215      | 0.5923      | 0.5427      | 0.3052        | NA          | NA          | NA     | NA            |
|                                                 | ACUGUGCGUGUGACAGCGGCU     | 2.1925      | 1.9243      | 1.1393      | 0.7436        | 3.1856      | 2.3298      | 1.3673 | 0.1040        |
|                                                 | CUGUGCGUGUGACAGCGGCUGAA   | 7.1310      | 6.3103      | 1.1301      | 0.4938        | 8.3580      | 6.1532      | 1.3583 | <b>0.0044</b> |
|                                                 | CUGUGCGUGUGACAGCGGCUGAU   | 0.7301      | 0.0524      | 13.945<br>5 | <b>0.0112</b> | 1.2802      | 1.0870      | 1.1778 | 0.4821        |
|                                                 | CUGUGCGUGUGACAGCGGCUGAAA  | 5.6719      | 3.1524      | 1.7992      | <b>0.0370</b> | 8.2720      | 6.9212      | 1.1952 | 0.3214        |
|                                                 | CUGUGCGUGUGACAGCGGCUGAAU  | 0.5124      | 0.0349      | 14.679<br>6 | <b>0.0182</b> | 0.8841      | 0.6200      | 1.4259 | 0.1142        |
|                                                 | CUGUGCGUGUGACAGCGGCUGAAU  | 5.6741      | 4.9682      | 1.1421      | 0.4794        | 8.5123      | 6.5743      | 1.2948 | <b>0.0383</b> |
|                                                 | CUGUGCGUGUGACAGCGGCUGU    | 7.1091      | 8.1233      | 0.8751      | 0.3488        | 8.3845      | 7.7964      | 1.0754 | 0.5403        |
|                                                 | CUGUGCGUGUGACAGCGGCUGAUU  | 2.0013      | 2.1335      | 0.9380      | 0.8227        | 2.6846      | 2.4225      | 1.1082 | 0.5241        |
|                                                 | ACUGUGCGUGUGACAGCGGCUGU   | 1.8866      | 2.9019      | 0.6501      | <b>0.0184</b> | 2.7441      | 3.1914      | 0.8598 | 0.2046        |
|                                                 | CUGUGCGUGUGACAGCGGCUGUU   | 0.4066      | 0.1864      | 2.1810      | 0.1741        | NA          | NA          | NA     | NA            |
|                                                 | CUGUGCGUGUGACAGCGGCUGUAAU | NA          | NA          | NA          | NA            | 0.4698      | 0.5702      | 0.8238 | 0.6607        |

Underline, adding A, U or mixed nucleotides; *P*-value based on *t*-test; bold marked *P*-value < 0.05; AVG, average

**Supplementary Table S3.** Top 10 gene ontology (GO) terms for targets of commonly deregulated miRNA in ccRCC

| GO id                | Description                                                                   | q-value    | Occurrences in Sample | Occurrences in Genome |
|----------------------|-------------------------------------------------------------------------------|------------|-----------------------|-----------------------|
| <b>miRNA-200c-3p</b> |                                                                               |            |                       |                       |
| GO:0038093           | Fc receptor signaling pathway                                                 | 1.47E-13   | 25                    | 219                   |
| GO:0002768           | immune response-regulating cell surface receptor signaling pathway            | 1.06E-12   | 27                    | 296                   |
| GO:0038095           | Fc-epsilon receptor signaling pathway                                         | 2.86E-12   | 21                    | 166                   |
| GO:0048011           | neurotrophin TRK receptor signaling pathway                                   | 7.68E-12   | 25                    | 274                   |
| GO:0038179           | neurotrophin signaling pathway                                                | 7.92E-12   | 25                    | 277                   |
| GO:0008543           | fibroblast growth factor receptor signaling pathway                           | 3.75E-10   | 19                    | 170                   |
| GO:0044344           | cellular response to fibroblast growth factor stimulus                        | 1.08E-09   | 19                    | 183                   |
| GO:0071774           | response to fibroblast growth factor                                          | 1.08E-09   | 19                    | 183                   |
| GO:0007173           | epidermal growth factor receptor signaling pathway                            | 1.52E-09   | 20                    | 213                   |
| GO:0038127           | ERBB signaling pathway                                                        | 1.78E-09   | 20                    | 216                   |
| <b>miRNA-362-5p</b>  |                                                                               |            |                       |                       |
| GO:0030897           | HOPS complex                                                                  | 1.17E-05   | 5                     | 12                    |
| GO:0006354           | DNA-templated transcription, elongation                                       | 0.61636971 | 5                     | 108                   |
| <b>miRNA-363-3p</b>  |                                                                               |            |                       |                       |
| GO:0000289           | nuclear-transcribed mRNA poly(A) tail shortening                              | 0.01642573 | 7                     | 31                    |
| GO:0010608           | posttranscriptional regulation of gene expression                             | 0.15691157 | 17                    | 298                   |
| GO:0061384           | heart trabecula morphogenesis                                                 | 0.15691157 | 4                     | 12                    |
| GO:0014009           | glial cell proliferation                                                      | 0.15691157 | 4                     | 11                    |
| GO:0002320           | lymphoid progenitor cell differentiation                                      | 0.15691157 | 4                     | 12                    |
| GO:0006417           | regulation of translation                                                     | 0.18950051 | 11                    | 152                   |
| GO:0010942           | positive regulation of cell death                                             | 0.18950051 | 15                    | 268                   |
| GO:0000288           | nuclear-transcribed mRNA catabolic process, deadenylation-dependent decay     | 0.18950051 | 7                     | 58                    |
| GO:0030014           | CCR4-NOT complex                                                              | 0.23063786 | 4                     | 15                    |
| GO:0031124           | mRNA 3'-end processing                                                        | 0.23606028 | 8                     | 88                    |
| <b>miRNA-204-5p</b>  |                                                                               |            |                       |                       |
| GO:0007178           | transmembrane receptor protein serine/threonine kinase signaling pathway      | 5.43E-05   | 21                    | 218                   |
| GO:0002768           | immune response-regulating cell surface receptor signaling pathway            | 6.31E-05   | 24                    | 296                   |
| GO:0005126           | cytokine receptor binding                                                     | 2.06E-04   | 16                    | 148                   |
| GO:0007179           | transforming growth factor beta receptor signaling pathway                    | 2.06E-04   | 16                    | 150                   |
| GO:0043565           | sequence-specific DNA binding                                                 | 2.06E-04   | 21                    | 255                   |
| GO:0002429           | immune response-activating cell surface receptor signaling pathway            | 2.64E-04   | 17                    | 175                   |
| GO:0000981           | sequence-specific DNA binding RNA polymerase II transcription factor activity | 3.03E-04   | 18                    | 200                   |
| GO:0071559           | response to transforming growth factor beta                                   | 6.04E-04   | 16                    | 169                   |

|                     |                                                                                                 |            |    |     |
|---------------------|-------------------------------------------------------------------------------------------------|------------|----|-----|
| GO:0071560          | cellular response to transforming growth factor beta stimulus                                   | 6.04E-04   | 16 | 169 |
| GO:0090101          | negative regulation of transmembrane receptor protein serine/threonine kinase signaling pathway | 6.74E-04   | 11 | 78  |
| <b>miRNA-21-5p</b>  |                                                                                                 |            |    |     |
| GO:0071214          | cellular response to abiotic stimulus                                                           | 1.54E-04   | 21 | 160 |
| GO:0034142          | toll-like receptor 4 signaling pathway                                                          | 1.54E-04   | 17 | 107 |
| GO:0019787          | small conjugating protein ligase activity                                                       | 1.54E-04   | 25 | 221 |
| GO:0004842          | ubiquitin-protein ligase activity                                                               | 1.54E-04   | 25 | 209 |
| GO:0016881          | acid-amino acid ligase activity                                                                 | 1.88E-04   | 25 | 232 |
| GO:0071260          | cellular response to mechanical stimulus                                                        | 1.88E-04   | 11 | 43  |
| GO:0016569          | covalent chromatin modification                                                                 | 1.88E-04   | 27 | 265 |
| GO:0042326          | negative regulation of phosphorylation                                                          | 3.09E-04   | 24 | 223 |
| GO:0016570          | histone modification                                                                            | 3.30E-04   | 26 | 260 |
| GO:0097285          | cell-type specific apoptotic process                                                            | 3.30E-04   | 22 | 194 |
| <b>miRNA-224-5p</b> |                                                                                                 |            |    |     |
| GO:0038093          | Fc receptor signaling pathway                                                                   | 1.47E-07   | 16 | 219 |
| GO:0002768          | immune response-regulating cell surface receptor signaling pathway                              | 7.18E-07   | 17 | 296 |
| GO:0038179          | neurotrophin signaling pathway                                                                  | 1.12E-05   | 15 | 277 |
| GO:0048011          | neurotrophin TRK receptor signaling pathway                                                     | 1.12E-05   | 15 | 274 |
| GO:0038095          | Fc-epsilon receptor signaling pathway                                                           | 1.55E-05   | 12 | 166 |
| GO:0008543          | fibroblast growth factor receptor signaling pathway                                             | 1.69E-05   | 12 | 170 |
| GO:0044344          | cellular response to fibroblast growth factor stimulus                                          | 2.91E-05   | 12 | 183 |
| GO:0071774          | response to fibroblast growth factor                                                            | 2.91E-05   | 12 | 183 |
| GO:0007173          | epidermal growth factor receptor signaling pathway                                              | 1.21E-04   | 12 | 213 |
| GO:0048017          | inositol lipid-mediated signaling                                                               | 1.21E-04   | 11 | 173 |
| <b>miRNA-155-5p</b> |                                                                                                 |            |    |     |
| GO:0019901          | protein kinase binding                                                                          | 4.52E-07   | 41 | 276 |
| GO:0071560          | cellular response to transforming growth factor beta stimulus                                   | 8.10E-05   | 27 | 169 |
| GO:0071559          | response to transforming growth factor beta                                                     | 8.10E-05   | 27 | 169 |
| GO:0038093          | Fc receptor signaling pathway                                                                   | 2.52E-04   | 30 | 219 |
| GO:0007179          | transforming growth factor beta receptor signaling pathway                                      | 2.52E-04   | 24 | 150 |
| GO:0051169          | nuclear transport                                                                               | 2.52E-04   | 35 | 282 |
| GO:0010608          | posttranscriptional regulation of gene expression                                               | 2.76E-04   | 36 | 298 |
| GO:0038095          | Fc-epsilon receptor signaling pathway                                                           | 3.31E-04   | 25 | 166 |
| GO:0038179          | neurotrophin signaling pathway                                                                  | 3.31E-04   | 34 | 277 |
| GO:0006913          | nucleocytoplasmic transport                                                                     | 3.55E-04   | 34 | 279 |
| <b>miRNA-210-3p</b> |                                                                                                 |            |    |     |
| GO:0036294          | cellular response to decreased oxygen levels                                                    | 2.51E-04   | 8  | 70  |
| GO:0071453          | cellular response to oxygen levels                                                              | 2.51E-04   | 8  | 72  |
| GO:0071456          | cellular response to hypoxia                                                                    | 2.51E-04   | 8  | 68  |
| GO:1901992          | positive regulation of mitotic cell cycle phase transition                                      | 0.00435409 | 5  | 26  |
| GO:1901989          | positive regulation of cell cycle phase transition                                              | 0.00435409 | 5  | 27  |
| GO:0036293          | response to decreased oxygen levels                                                             | 0.00483169 | 8  | 118 |

|            |                                               |                |   |     |
|------------|-----------------------------------------------|----------------|---|-----|
| GO:0070482 | response to oxygen levels                     | 0.004831<br>69 | 8 | 120 |
| GO:0001666 | response to hypoxia                           | 0.004831<br>69 | 8 | 116 |
| GO:0010639 | negative regulation of organelle organization | 0.004831<br>69 | 9 | 163 |
| GO:0007059 | chromosome segregation                        | 0.006471<br>4  | 8 | 128 |

**Supplementary Table S4.** Primers used in the experimental procedures.

| miRNA                    | primer sequence                                              |
|--------------------------|--------------------------------------------------------------|
| universal reverse primer | CCAGTCTCAGGGTCCGAGGTATTC                                     |
| Anchor RT primer         | CGACTCGATCCAGTCTCAGGGTCCGAGGTATTCGATCGAGTCGCACTTTTTTTTTTTTVN |
| miR-200c-3p_F            | TAATACTGCCGGGTAATGAT                                         |
| miR-363-3p_F             | AATTGCACGGTATCCATC                                           |
| miR-362-5p_F             | AATCCTTGGAACCTAGGT                                           |
| miR-204-5p_F             | TTCCCTTTGTCATCCTAT                                           |
| miR-21-5p_F              | CAACACCAGTCGATGGGC                                           |
| miR-224-5p_F             | TCAAGTCACTAGTGGTTC                                           |
| miR-155-5p_F             | TTAATGCTAATCGTGATA                                           |
| miR-210-3p_F             | CTGTGCGTGTGACAGCGG                                           |
| miR-127-3p_F             | CGGATCCGTCTGAGCTTG                                           |
| miR-139-5p_F             | TACAGTGCACGTGTCTCC                                           |
| miR-424-5p_F             | CAGCAGCAATTCATGTTTTG                                         |
| miR-146b-5p_F            | GAGAACTGAATTCCATAGGC                                         |
| miR-183-5p_F             | ATGGCACTGGTAGAATTC                                           |
| miR-218-5p_F             | TGTGCTTGATCTAACC                                             |
| iso-miR-363-3p_F         | TTGCACGGTATCCATCTGTA                                         |
| iso-miR-224-5p_F         | GTCCTAGTGGTCCGTTTAG                                          |
| U6_F                     | CAAATTCGTGAAGCGTTCC                                          |
| TUT4_F                   | TGCTCAACAGGTGGCTGGTTCA                                       |
| TUT4_R                   | GAGTTCTGTGGAAATGGCTGAGG                                      |
| PAPD4_F                  | AGTTCGTCCGTTAGTGCTGGTG                                       |
| PAPD4_R                  | GAGGGATGGAAGGATGGGTTC                                        |
| PAPD5_F                  | AGTGTGCTCCTCTTCTGCCACA                                       |
| PAPD5_R                  | AACTGCCTGAGAGGACTCCAAG                                       |
| DROSHA_F                 | GAAACTTCGCCACCTCCTAGCA                                       |
| DROSHA_R                 | CTCCACCGTTACTTCTCGTCTC                                       |
| DICER_F                  | ACTGCTGGATGTGGACCACACA                                       |
| DICER_R                  | GGCTTTCTCTTCTCAGCACTG                                        |
| DGCR8_F                  | GGAAATCCGAGGTCTGCATCCT                                       |
| DGCR8_R                  | GAGGCACCAAAAGGCTCACTTG                                       |
| GAPDH_F                  | CATCAATGGAAATCCCATCAC                                        |
| GAPDH_R                  | GGTTTTCTAGACGGCAGGTC                                         |

F, forward primer; R, reverse primer; V, base A, G or C; N, any base
